# Supplementary material for: Copper-catalysed synthesis of 3-hydroxyisoindolin-1-ones from benzylcyanide 2-iodobenzamides
Source: Royal Society of Chemistry journal article supplement (doi:10.1039/c9ob02329a), 2020-01-01

## Supporting Information

### Copper Catalyzed Synthesis of 3-Hydroxyisoindolin-1-one and Benzopyridoindolone Derivatives from 2-Iodobenzamide and Benzylcyanide

Veerababurao Kavala, Chen-Yu Wang, Cheng-Chuan Wang, Prakash Bhimrao Patil, ChiaChi Fang, Chun-Wei Kuo, Ching-Fa Yao\*

#### Table of Contents

| S. NO | Content        | Page number |
|-------|----------------|-------------|
| 1.    | Crystal Data   | 2           |
| 2.    | Spectra Copies | 6           |

# Crystal Data

## Crystal Structure of Compound 3aa (ORTEP VIEW 30% probability)

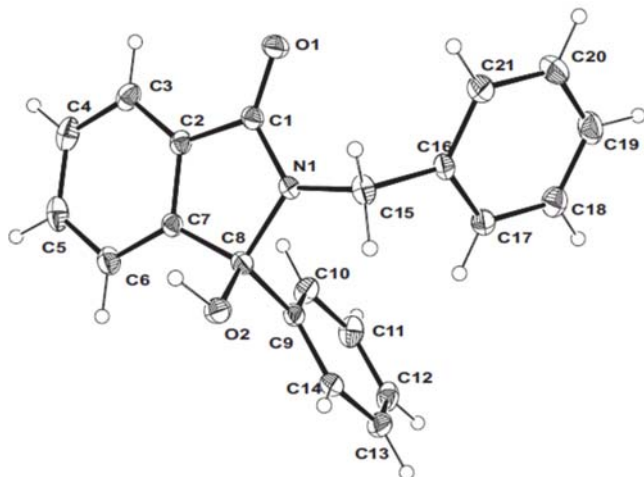

Table S1. Crystal data and structure refinement for 3aa. (CCDC Number- 1945018)

|                        |                         |                              |
|------------------------|-------------------------|------------------------------|
| Identification code    | ch15498                 |                              |
| Empirical formula      | $C_{21}H_{17}NO_2$      |                              |
| Formula weight         | 315.36                  |                              |
| Temperature            | 200(2) K                |                              |
| Wavelength             | 0.71073 Å               |                              |
| Crystal system         | Triclinic               |                              |
| Space group            | P -1                    |                              |
| Unit cell dimensions   | $a = 9.7191(17)$ Å      | $\alpha = 61.607(6)^\circ$ . |
|                        | $b = 10.2939(19)$ Å     | $\beta = 63.029(5)^\circ$ .  |
|                        | $c = 10.630(2)$ Å       | $\gamma = 87.604(6)^\circ$ . |
| Volume                 | 813.1(3) Å <sup>3</sup> |                              |
| Z                      | 2                       |                              |
| Density (calculated)   | 1.288 Mg/m <sup>3</sup> |                              |
| Absorption coefficient | 0.083 mm <sup>-1</sup>  |                              |
| F(000)                 | 332                     |                              |

|                                   |                                             |
|-----------------------------------|---------------------------------------------|
| Crystal size                      | 0.31 x 0.25 x 0.06 mm <sup>3</sup>          |
| Theta range for data collection   | 2.38 to 25.07°.                             |
| Index ranges                      | -11<=h<=11, -11<=k<=12, -12<=l<=12          |
| Reflections collected             | 7092                                        |
| Independent reflections           | 2860 [R(int) = 0.0384]                      |
| Completeness to theta = 25.07°    | 98.7 %                                      |
| Absorption correction             | multi-scan                                  |
| Max. and min. transmission        | 0.9950 and 0.9748                           |
| Refinement method                 | Full-matrix least-squares on F <sup>2</sup> |
| Data / restraints / parameters    | 2860 / 0 / 217                              |
| Goodness-of-fit on F <sup>2</sup> | 1.067                                       |
| Final R indices [I>2sigma(I)]     | R1 = 0.0500, wR2 = 0.1208                   |
| R indices (all data)              | R1 = 0.0879, wR2 = 0.1546                   |
| Largest diff. peak and hole       | 0.223 and -0.236 e.Å <sup>-3</sup>          |

**Crystal Structure of Compound 3ae (ORTEP VIEW 30% probability)**

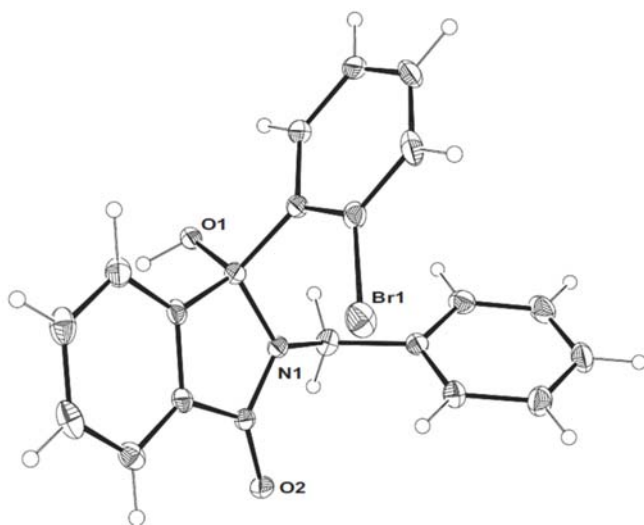

**Table S 2. Crystal data and structure refinement for 3ae. (CCDC Number 1945019)**

Identification code ch16057

|                                   |                                                     |                 |
|-----------------------------------|-----------------------------------------------------|-----------------|
| Empirical formula                 | C <sub>21</sub> H <sub>16</sub> Br N O <sub>2</sub> |                 |
| Formula weight                    | 394.26                                              |                 |
| Temperature                       | 200(2) K                                            |                 |
| Wavelength                        | 0.71073 Å                                           |                 |
| Crystal system                    | Triclinic                                           |                 |
| Space group                       | P -1                                                |                 |
| Unit cell dimensions              | a = 8.9170(9) Å                                     | α = 73.236(5)°. |
|                                   | b = 10.2917(9) Å                                    | β = 67.643(5)°. |
|                                   | c = 11.1275(8) Å                                    | γ = 65.564(6)°. |
| Volume                            | 849.34(13) Å <sup>3</sup>                           |                 |
| Z                                 | 2                                                   |                 |
| Density (calculated)              | 1.542 Mg/m <sup>3</sup>                             |                 |
| Absorption coefficient            | 2.434 mm <sup>-1</sup>                              |                 |
| F(000)                            | 400                                                 |                 |
| Crystal size                      | 0.58 x 0.39 x 0.25 mm <sup>3</sup>                  |                 |
| Theta range for data collection   | 2.20 to 25.07°.                                     |                 |
| Index ranges                      | -10 ≤ h ≤ 10, -12 ≤ k ≤ 12, -12 ≤ l ≤ 13            |                 |
| Reflections collected             | 6699                                                |                 |
| Independent reflections           | 2972 [R(int) = 0.0356]                              |                 |
| Completeness to theta = 25.07°    | 98.1 %                                              |                 |
| Absorption correction             | multi-scan                                          |                 |
| Max. and min. transmission        | 0.5813 and 0.3326                                   |                 |
| Refinement method                 | Full-matrix least-squares on F <sup>2</sup>         |                 |
| Data / restraints / parameters    | 2972 / 0 / 226                                      |                 |
| Goodness-of-fit on F <sup>2</sup> | 1.113                                               |                 |
| Final R indices [I > 2σ(I)]       | R1 = 0.0345, wR2 = 0.0986                           |                 |
| R indices (all data)              | R1 = 0.0466, wR2 = 0.1128                           |                 |

Largest diff. peak and hole

0.369 and -0.499 e.Å<sup>-3</sup>

**Crystal Structure of Compound 3mn (ORTEP VIEW 30% probability)**

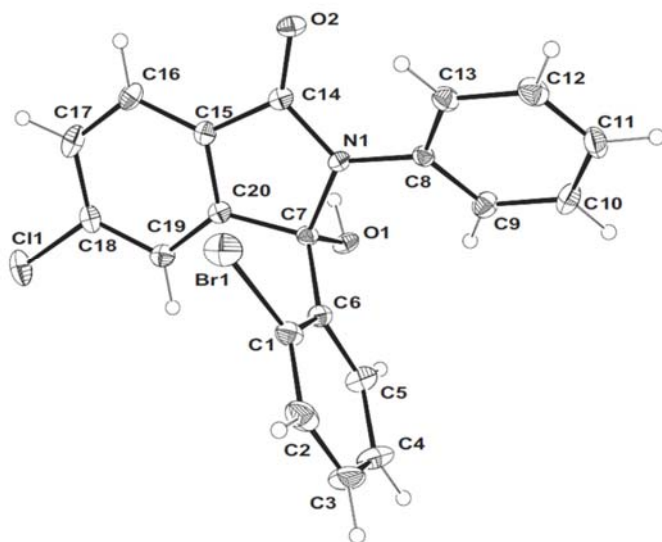

**Table S3. Crystal data and structure refinement for 3mn. (CCDC Number 1945020)**

|                      |                                                        |                  |
|----------------------|--------------------------------------------------------|------------------|
| Identification code  | a15070                                                 |                  |
| Empirical formula    | C <sub>20</sub> H <sub>13</sub> Br Cl N O <sub>2</sub> |                  |
| Formula weight       | 414.67                                                 |                  |
| Temperature          | 200(2) K                                               |                  |
| Wavelength           | 0.71073 Å                                              |                  |
| Crystal system       | Monoclinic                                             |                  |
| Space group          | C 2/c                                                  |                  |
| Unit cell dimensions | a = 25.659(3) Å                                        | α = 90°.         |
|                      | b = 8.0570(7) Å                                        | β = 114.978(4)°. |
|                      | c = 18.4834(17) Å                                      | γ = 90°.         |
| Volume               | 3463.7(6) Å <sup>3</sup>                               |                  |
| Z                    | 8                                                      |                  |
| Density (calculated) | 1.590 Mg/m <sup>3</sup>                                |                  |

|                                   |                                             |
|-----------------------------------|---------------------------------------------|
| Absorption coefficient            | 2.541 mm <sup>-1</sup>                      |
| F(000)                            | 1664                                        |
| Crystal size                      | 0.42 x 0.36 x 0.15 mm <sup>3</sup>          |
| Theta range for data collection   | 2.32 to 25.11°.                             |
| Index ranges                      | -30<=h<=24, -9<=k<=7, -22<=l<=21            |
| Reflections collected             | 9036                                        |
| Independent reflections           | 3052 [R(int) = 0.0413]                      |
| Completeness to theta = 25.11°    | 99.1 %                                      |
| Absorption correction             | multi-scan                                  |
| Max. and min. transmission        | 0.7018 and 0.4150                           |
| Refinement method                 | Full-matrix least-squares on F <sup>2</sup> |
| Data / restraints / parameters    | 3052 / 0 / 226                              |
| Goodness-of-fit on F <sup>2</sup> | 1.052                                       |
| Final R indices [I>2sigma(I)]     | R1 = 0.0409, wR2 = 0.0874                   |
| R indices (all data)              | R1 = 0.0650, wR2 = 0.0965                   |
| Largest diff. peak and hole       | 0.320 and -0.686 e.Å <sup>-3</sup>          |

# *Spectra Copies*

## 2-Benzyl-3-hydroxy-3-phenylisoindolin-1-one (3aa)

1H of benzyl final

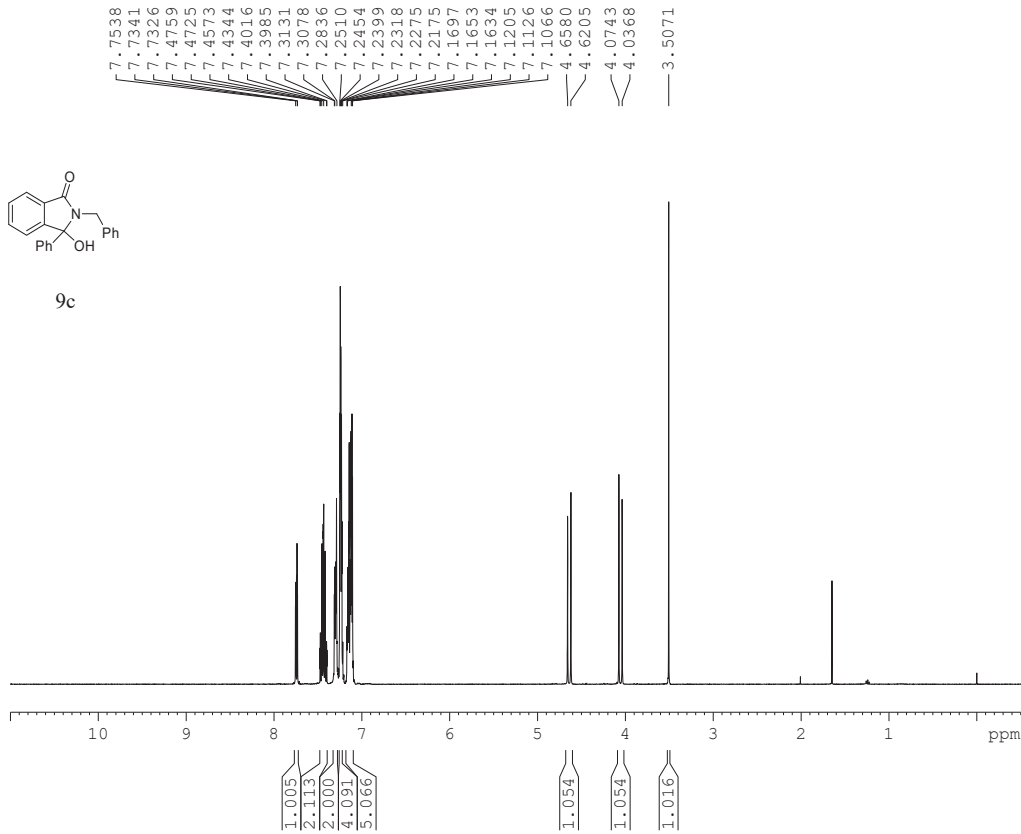

Current Data Parameters  
NAME 20131019  
EXPNO 3  
PROCNO 1

F2 - Acquisition Parameters  
Date\_ 20131019  
Time 15.20  
INSTRUM SPECT  
PROBHD 5 mm PABBO BB/  
PULPROG zg30  
TD 32768  
SOLVENT CDCl3  
NS 16  
DS 0  
SWH 7211.539 Hz  
FIDRES 0.220079 Hz  
AQ 2.2719147 sec  
RG 78.51  
DW 69.333 usec  
DE 10.52 usec  
TE 298.6 K  
D1 2.0000000 sec  
TD0 1

===== CHANNEL f1 =====  
SFO1 400.1324008 MHz  
NUC1 1H  
P1 12.80 usec  
PLW1 15.0000000 W

F2 - Processing parameters  
SI 16384  
SF 400.1300132 MHz  
WDW EM  
SSB 0  
LB 0 Hz  
GB 0  
PC 1.00

## 2-Benzyl-3-hydroxy-3-phenylisoindolin-1-one (3aa)

13C of benzyl final

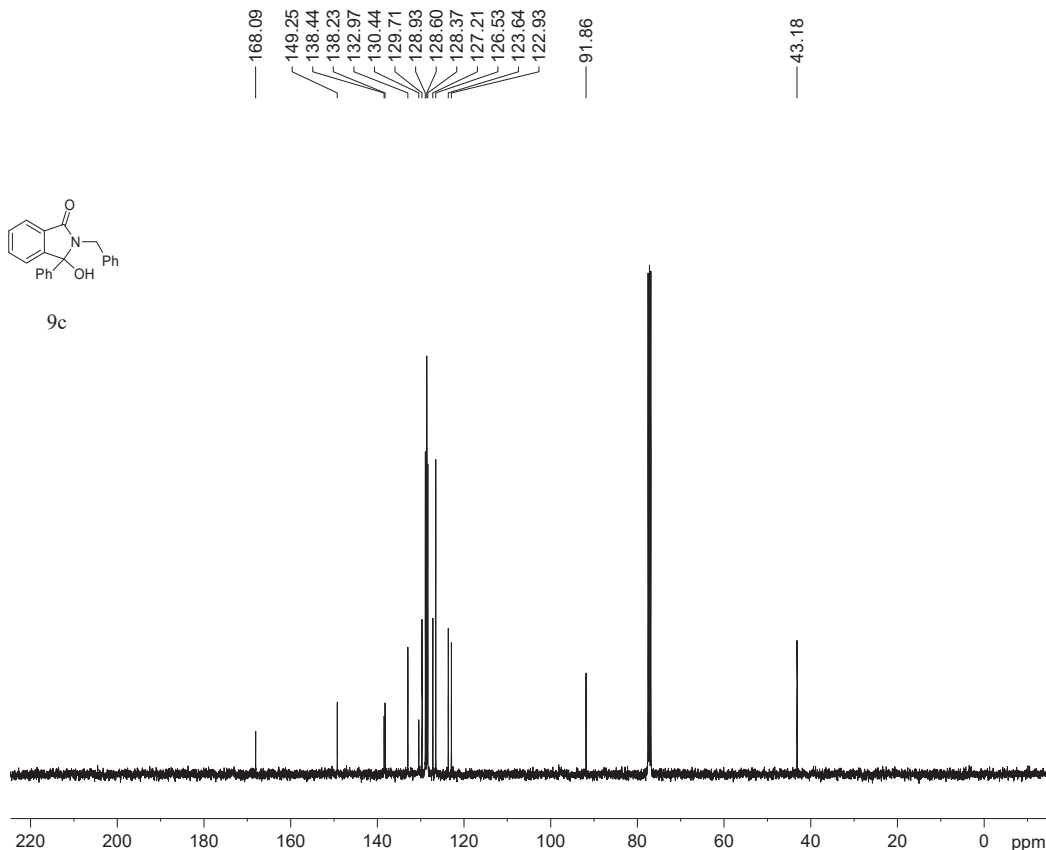

Current Data Parameters  
NAME 20131019  
EXPNO 4  
PROCNO 1

F2 - Acquisition Parameters  
Date\_ 20131019  
Time 15.25  
INSTRUM SPECT  
PROBHD 5 mm PABBO BB/  
PULPROG zgpg30  
TD 32768  
SOLVENT CDCl3  
NS 171  
DS 0  
SWH 24038.461 Hz  
FIDRES 0.733596 Hz  
AQ 0.6815744 sec  
RG 198.09  
DW 20.800 usec  
DE 6.50 usec  
TE 299.2 K  
D1 2.0000000 sec  
D11 0.03000000 sec  
TD0 1

===== CHANNEL f1 =====  
SFO1 100.6233324 MHz  
NUC1 13C  
P1 10.00 usec  
PLW1 46.0000000 W

===== CHANNEL f2 =====  
SFO2 400.1316005 MHz  
NUC2 1H  
CPDPRG2 waltz16  
PCPD2 90.00 usec  
PLW2 15.0000000 W  
PLW12 0.34252000 W  
PLW13 0.27744001 W

F2 - Processing parameters  
SI 32768  
SF 100.6127491 MHz  
WDW EM  
SSB 0  
LB 2.00 Hz  
GB 0  
PC 1.00

## 2-Benzyl-3-hydroxy-3-(p-tolyl)isoindolin-1-one (3ab)

<sup>1</sup>H of 4-CH<sub>3</sub> BnCN final product

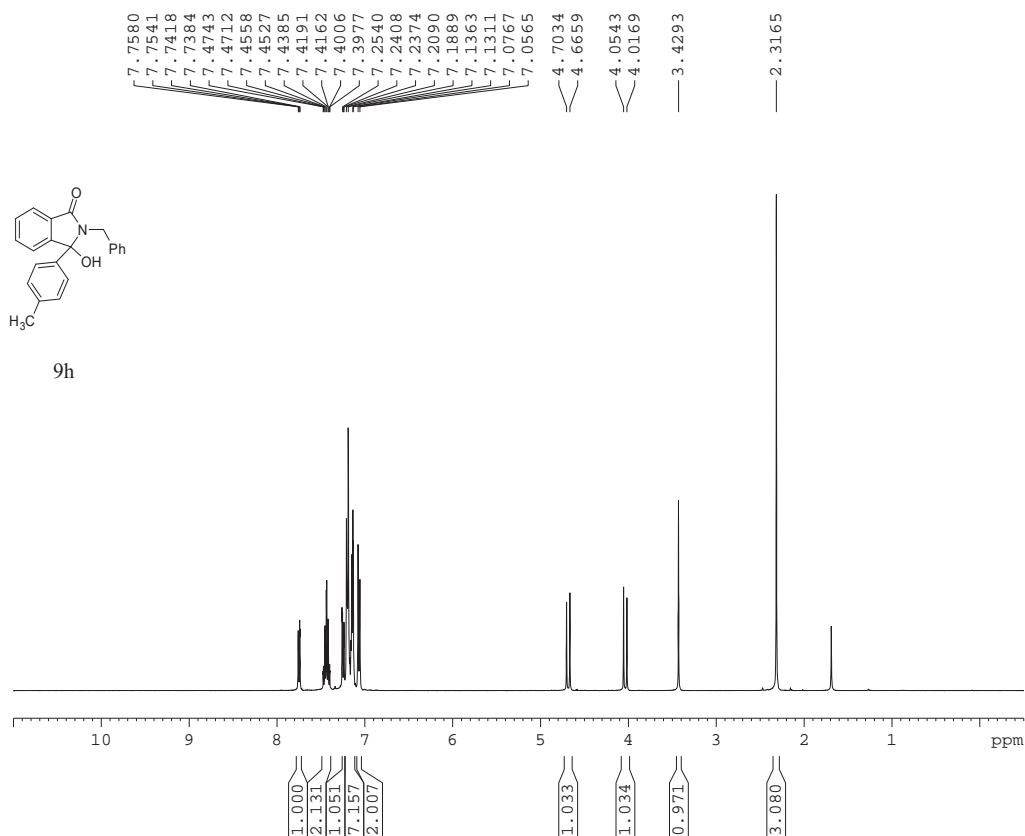

Current Data Parameters  
 NAME 20140419  
 EXPNO 2  
 PROCNO 1

F2 - Acquisition Parameters  
 Date\_ 20140419  
 Time 18.24  
 INSTRUM spect  
 PROBHD 5 mm PABBO BB/  
 PULPROG zg30  
 TD 32768  
 SOLVENT CDCl3  
 NS 16  
 DS 0  
 SWH 7211.539 Hz  
 FIDRES 0.220079 Hz  
 AQ 2.2719147 sec  
 RG 71.42  
 DW 69.333 usec  
 DE 10.52 usec  
 TE 298.6 K  
 D1 2.0000000 sec  
 TDO 1

===== CHANNEL f1 =====  
 SFO1 400.1324008 MHz  
 NUC1 1H  
 P1 12.80 usec  
 PLW1 15.0000000 W

F2 - Processing parameters  
 SI 16384  
 SF 400.1300094 MHz  
 WDW EM  
 SSB 0  
 LB 0 Hz  
 GB 0  
 PC 1.00

## 2-Benzyl-3-hydroxy-3-(p-tolyl)isoindolin-1-one (3ab)

2

<sup>13</sup>C of CH<sub>3</sub> BnCN final product

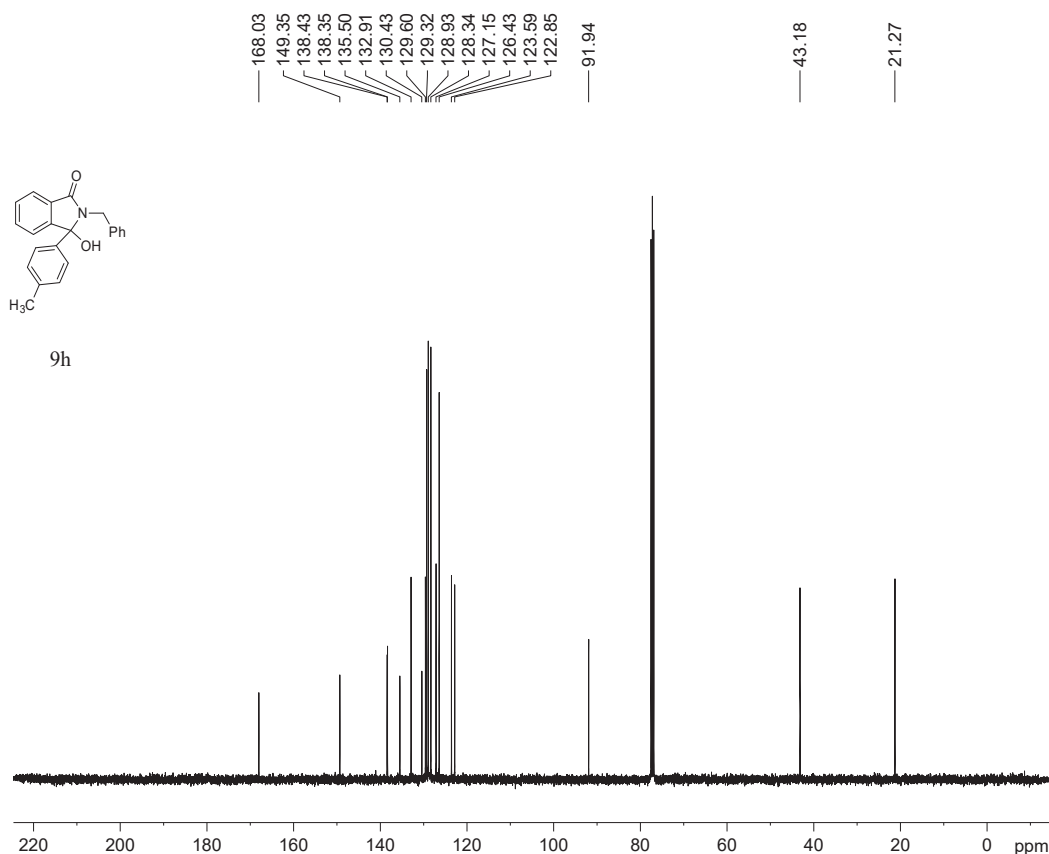

Current Data Parameters  
 NAME 20140418  
 EXPNO 19  
 PROCNO 1

F2 - Acquisition Parameters  
 Date\_ 20140419  
 Time 0.20  
 INSTRUM spect  
 PROBHD 5 mm SEI 1H-13  
 PULPROG zgpg30  
 TD 32768  
 SOLVENT CDCl3  
 NS 1000  
 DS 0  
 SWH 24038.461 Hz  
 FIDRES 0.733596 Hz  
 AQ 0.6815744 sec  
 RG 4096  
 DW 20.800 usec  
 DE 6.50 usec  
 TE 300.5 K  
 D1 2.0000000 sec  
 D11 0.0300000 sec  
 TDO 1

===== CHANNEL f1 =====  
 NUC1 13C  
 P1 15.50 usec  
 PL1 7.30 dB  
 SFO1 100.6233325 MHz

===== CHANNEL f2 =====  
 CPDPRG2 waltz16  
 NUC2 1H  
 PCPD2 90.00 usec  
 PL2 -4.20 dB  
 PL12 13.10 dB  
 PL13 16.10 dB  
 SFO2 400.1316005 MHz

F2 - Processing parameters  
 SI 32768  
 SF 100.6127499 MHz  
 WDW EM  
 SSB 0  
 LB 1.00 Hz  
 GB 0  
 PC 1.00



## 2-Benzyl-3-(4-(tert-butyl)phenyl)-3-hydroxyisoindolin-1-one (3ac)

<sup>1</sup>H of t-Bu BnCN final product

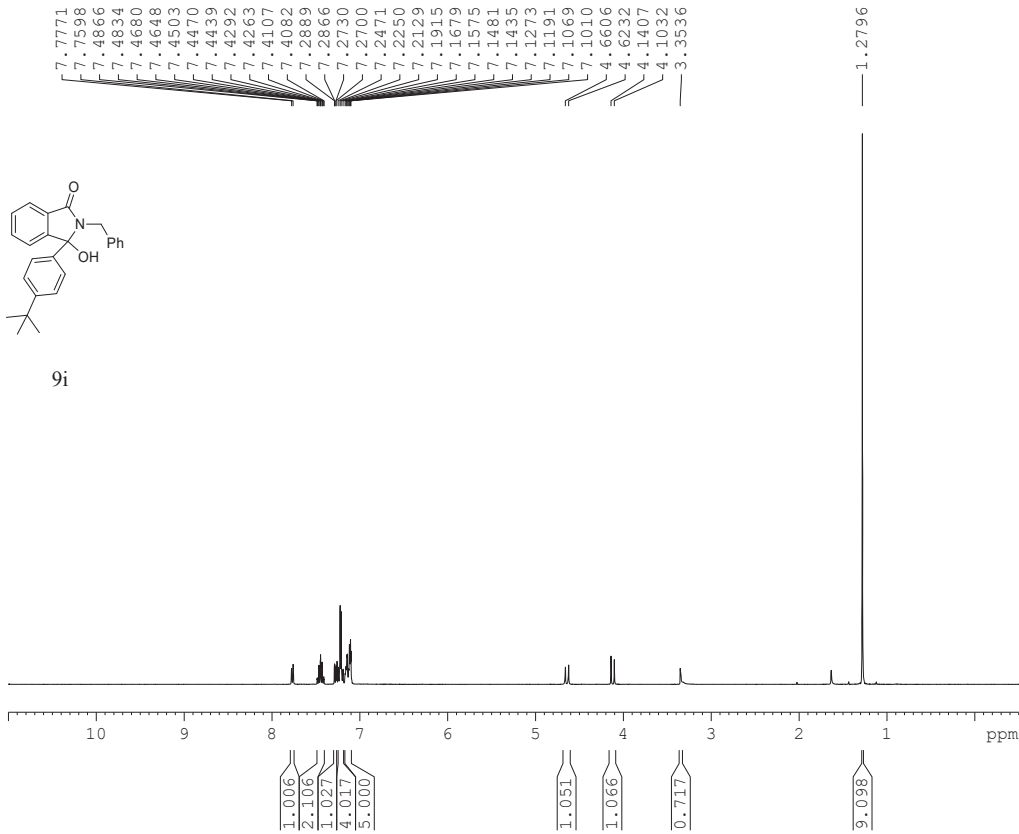

Current Data Parameters  
 NAME 20140418  
 EXPNO 13  
 PROCNO 1

F2 - Acquisition Parameters  
 Date\_ 20140418  
 Time 22.05  
 INSTRUM spect  
 PROBHD 5 mm SEI 1H-13  
 PULPROG zg30  
 TD 32768  
 SOLVENT CDCl3  
 NS 16  
 DS 0  
 SWH 7246.377 Hz  
 FIDRES 0.221142 Hz  
 AQ 2.2609921 sec  
 RG 114  
 DW 69.000 usec  
 DE 6.50 usec  
 TE 299.6 K  
 D1 2.00000000 sec  
 TDO 1

===== CHANNEL f1 =====  
 NUC1 1H  
 P1 11.00 usec  
 PL1 -4.20 dB  
 SFO1 400.1324008 MHz

F2 - Processing parameters  
 SI 16384  
 SF 400.1300091 MHz  
 WDW EM  
 SSB 0  
 LB 0 Hz  
 GB 0  
 PC 1.00

## 2-Benzyl-3-(4-(tert-butyl)phenyl)-3-hydroxyisoindolin-1-one (3ac)

<sup>13</sup>C of t-Bu BnCN final product

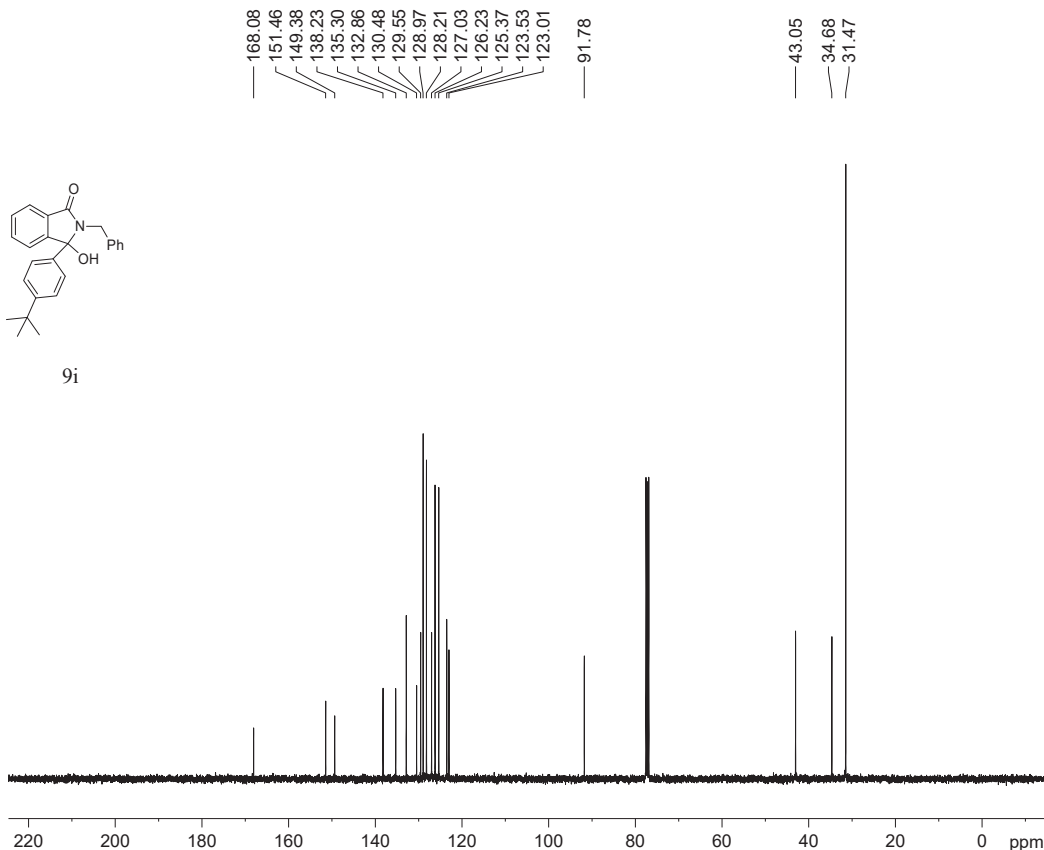

Current Data Parameters  
 NAME 20140418  
 EXPNO 17  
 PROCNO 1

F2 - Acquisition Parameters  
 Date\_ 20140418  
 Time 22.57  
 INSTRUM spect  
 PROBHD 5 mm SEI 1H-13  
 PULPROG zgpg30  
 TD 32768  
 SOLVENT CDCl3  
 NS 736  
 DS 0  
 SWH 24038.461 Hz  
 FIDRES 0.733596 Hz  
 AQ 0.6815744 sec  
 RG 2048  
 DW 20.800 usec  
 DE 6.50 usec  
 TE 299.9 K  
 D1 2.00000000 sec  
 D11 0.03000000 sec  
 TDO 1

===== CHANNEL f1 =====  
 NUC1 13C  
 P1 15.50 usec  
 PL1 7.30 dB  
 SFO1 100.6233325 MHz

===== CHANNEL f2 =====  
 NUC2 1H  
 PCPD2 90.00 usec  
 PL2 -4.20 dB  
 PL12 13.10 dB  
 PL13 16.10 dB  
 SFO2 400.1316005 MHz

F2 - Processing parameters  
 SI 32768  
 SF 100.6127500 MHz  
 WDW EM  
 SSB 0  
 LB 1.00 Hz  
 GB 0  
 PC 1.00

## 2-Benzyl-3-hydroxy-3-(4-methoxyphenyl)isoindolin-1-one (3ad)

<sup>1</sup>H of 4-OMe BnCN final product

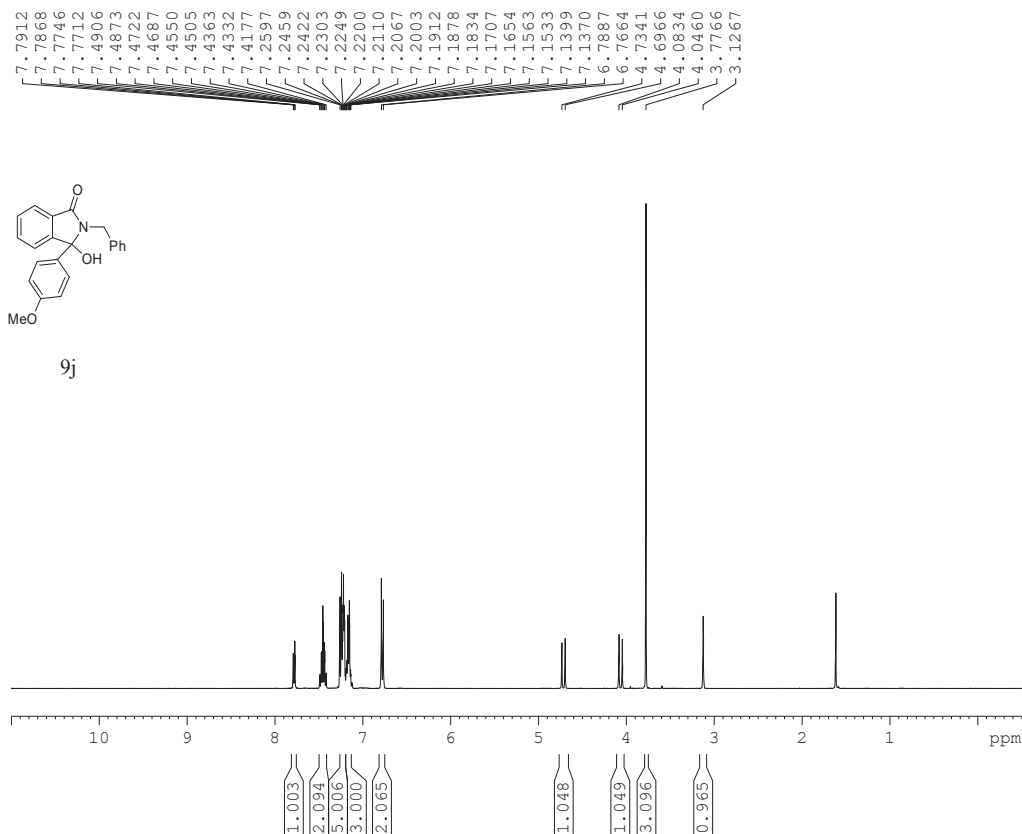

```
Current Data Parameters
NAME      20140425
EXPNO     4
PROCNO    1

F2 - Acquisition Parameters
Date_     20140425
Time      22.13
INSTRUM   spect
PROBHD    5 mm SEI 1H-13
PULPROG   zg30
TD         32768
SOLVENT   CDCl3
NS         16
DS         0
SWH        7246.377 Hz
FIDRES     0.221142 Hz
AQ         2.2609921 sec
RG         328.1
DW         69.000 usec
DE         6.50 usec
TE         299.1 K
D1         2.0000000 sec
TD0        1

===== CHANNEL f1 =====
NUC1       1H
P1         11.00 usec
PL1        -4.20 dB
SFO1       400.1324008 MHz

F2 - Processing parameters
SI         16384
SF         400.1300089 MHz
WDW        EM
SSB        0
LB         0 Hz
GB         0
PC         1.00
```

## 2-Benzyl-3-hydroxy-3-(4-methoxyphenyl)isoindolin-1-one (3ad)

<sup>13</sup>C of 4-OMe BnCN final product

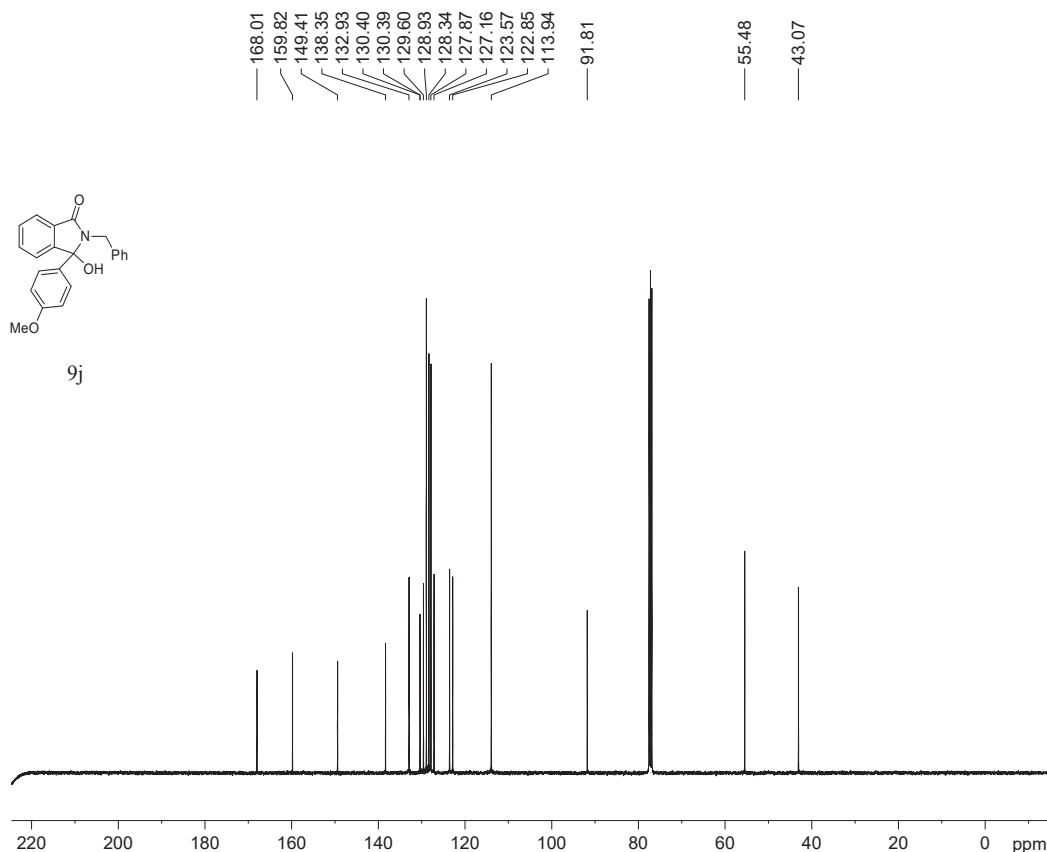

```
Current Data Parameters
NAME      20140425
EXPNO     6
PROCNO    1

F2 - Acquisition Parameters
Date_     20140425
Time      22.40
INSTRUM   spect
PROBHD    5 mm SEI 1H-13
PULPROG   zgpg30
TD         32768
SOLVENT   CDCl3
NS         12318
DS         0
SWH        24038.461 Hz
FIDRES     0.733596 Hz
AQ         0.6815744 sec
RG         4096
DW         20.800 usec
DE         6.50 usec
TE         299.4 K
D1         2.0000000 sec
D11        0.0300000 sec
TD0        1

===== CHANNEL f1 =====
NUC1       13C
P1         15.50 usec
PL1         7.30 dB
SFO1       100.6233325 MHz

===== CHANNEL f2 =====
CPDPRG2   waltz16
NUC2       1H
PCPD2     90.00 usec
PL2        -4.20 dB
PL12       13.10 dB
PL13       16.10 dB
SFO2       400.1316005 MHz

F2 - Processing parameters
SI         32768
SF         100.6127492 MHz
WDW        EM
SSB        0
LB         1.00 Hz
GB         0
PC         1.00
```

### 3-(Benzo[d][1,3]dioxol-5-yl)-2-benzyl-3-hydroxyisoindolin-1-one (3ae)

<sup>1</sup>H of methylenedioxy BnCN final product

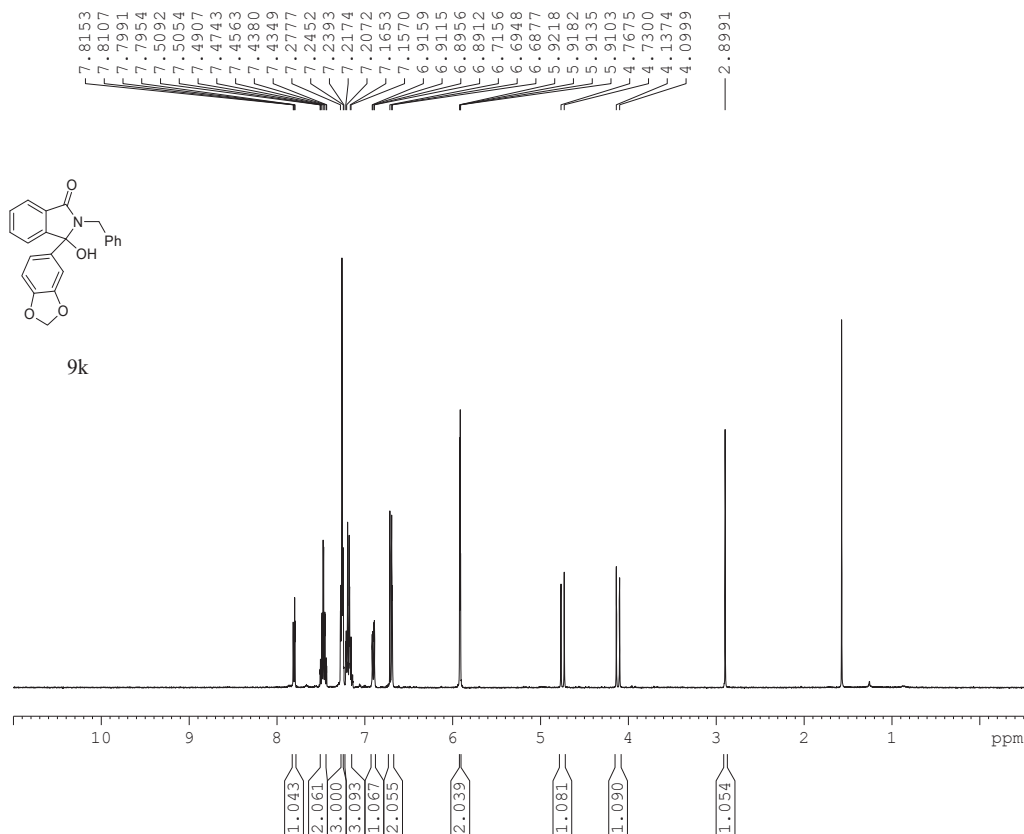

```

Current Data Parameters
NAME      20131116
EXPNO    6
PROCNO   1

F2 - Acquisition Parameters
Date_    20131116
Time     15.55
INSTRUM  SPECT
PROBHD   5 mm PABBO BB/
PULPROG  zg30
TD        32768
SOLVENT  CDCl3
NS        8
DS        0
SWH      7211.539 Hz
FIDRES   0.220079 Hz
AQ        2.2719147 sec
RG        198.09
DW        69.333 usec
DE        10.52 usec
TE        298.5 K
D1        2.0000000 sec
TD0       1

===== CHANNEL f1 =====
SFO1     400.1324008 MHz
NUC1      1H
P1        12.80 usec
PLW1     15.0000000 W

F2 - Processing parameters
SI        16384
SF        400.1300097 MHz
WDW       EM
SSB       0
LB        0 Hz
GB        0
PC        1.00
    
```

### 3-(Benzo[d][1,3]dioxol-5-yl)-2-benzyl-3-hydroxyisoindolin-1-one (3ae)

3

<sup>13</sup>C of methylenedioxy BnCN final product

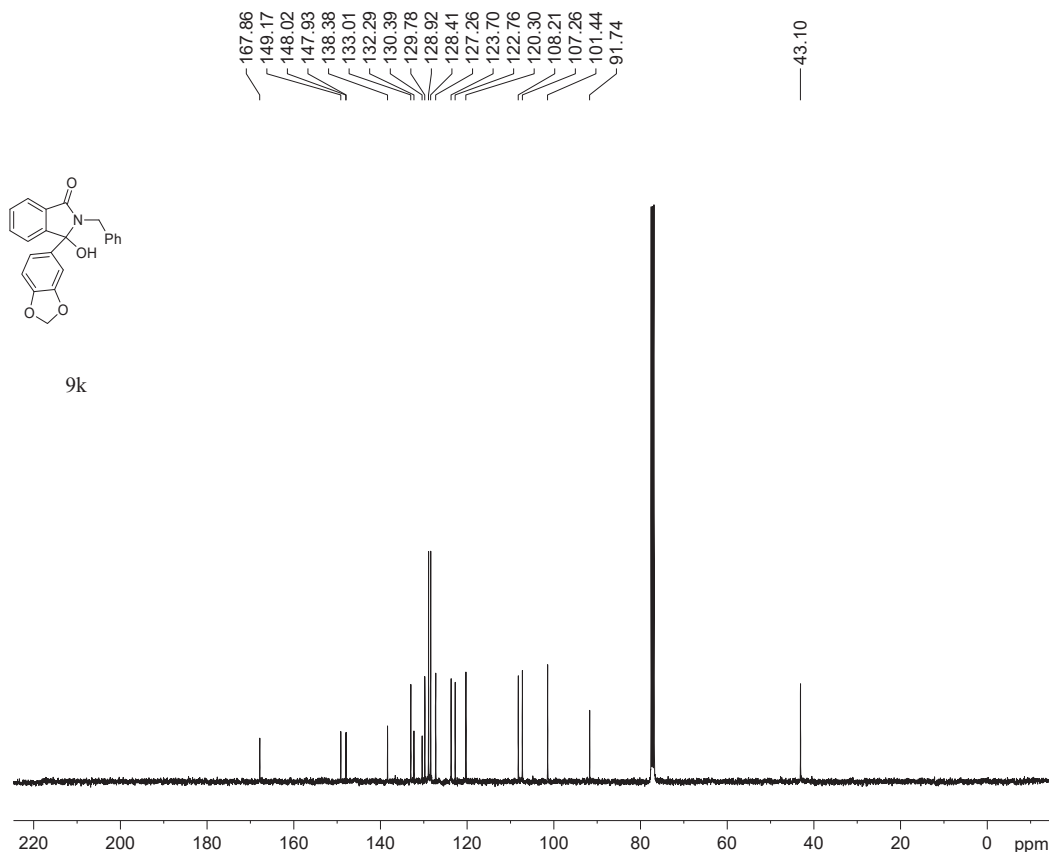

```

Current Data Parameters
NAME      20131116
EXPNO    5
PROCNO   1

F2 - Acquisition Parameters
Date_    20131116
Time     14.40
INSTRUM  SPECT
PROBHD   5 mm PABBO BB/
PULPROG  zpgpg30
TD        32768
SOLVENT  CDCl3
NS        779
DS        0
SWH      24038.461 Hz
FIDRES   0.733596 Hz
AQ        0.6815744 sec
RG        198.09
DW        20.800 usec
DE        6.50 usec
TE        298.9 K
D1        2.0000000 sec
D11      0.03000000 sec
TD0       1

===== CHANNEL f1 =====
SFO1     100.6233324 MHz
NUC1      13C
P1        10.00 usec
PLW1     46.0000000 W

===== CHANNEL f2 =====
SFO2     400.1316005 MHz
NUC2      1H
CPDPRG2  waltz16
PCPD2    90.00 usec
PLW2     15.0000000 W
PLW12    0.34252000 W
PLW13    0.27744001 W

F2 - Processing parameters
SI        32768
SF        100.6127462 MHz
WDW       EM
SSB       0
LB        2.00 Hz
GB        0
PC        1.00
    
```

# 2-Benzyl-3-(3-chlorophenyl)-3-hydroxyisoindolin-1-one (3af)

1H of 3-Cl BnCN final product

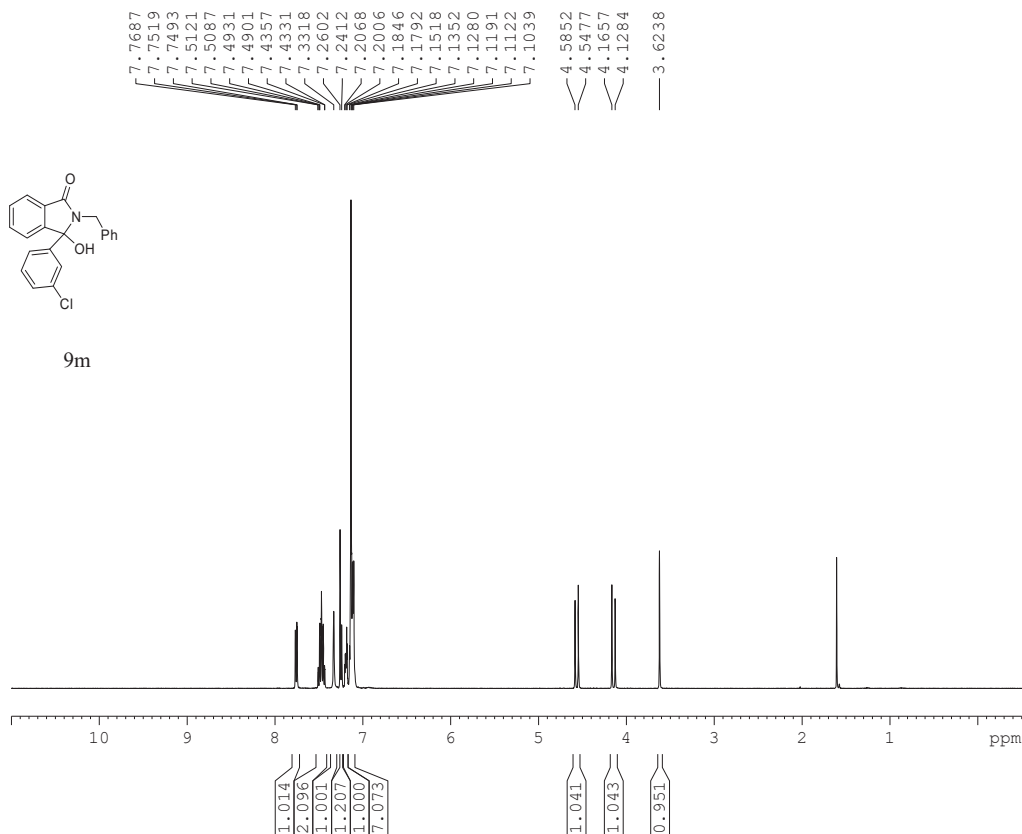

Current Data Parameters  
 NAME 20140418  
 EXPNO 6  
 PROCNO 1

F2 - Acquisition Parameters  
 Date\_ 20140418  
 Time 15.14  
 INSTRUM spect  
 PROBHD 5 mm SEI 1H-13  
 PULPROG zg30  
 TD 32768  
 SOLVENT CDCl3  
 NS 16  
 DS 0  
 SWH 7246.377 Hz  
 FIDRES 0.221142 Hz  
 AQ 2.260921 sec  
 RG 256  
 DW 69.000 usec  
 DE 6.50 usec  
 TE 299.6 K  
 D1 2.0000000 sec  
 TDO 1

===== CHANNEL f1 =====  
 NUC1 1H  
 P1 11.00 usec  
 PL1 -4.20 dB  
 SFO1 400.1324008 MHz

F2 - Processing parameters  
 SI 16384  
 SF 400.1300090 MHz  
 WDW EM  
 SSB 0  
 LB 0 Hz  
 GB 0  
 PC 1.00

# 2-Benzyl-3-(3-chlorophenyl)-3-hydroxyisoindolin-1-one (3af)

2

13C of 3-Cl BnCN final product

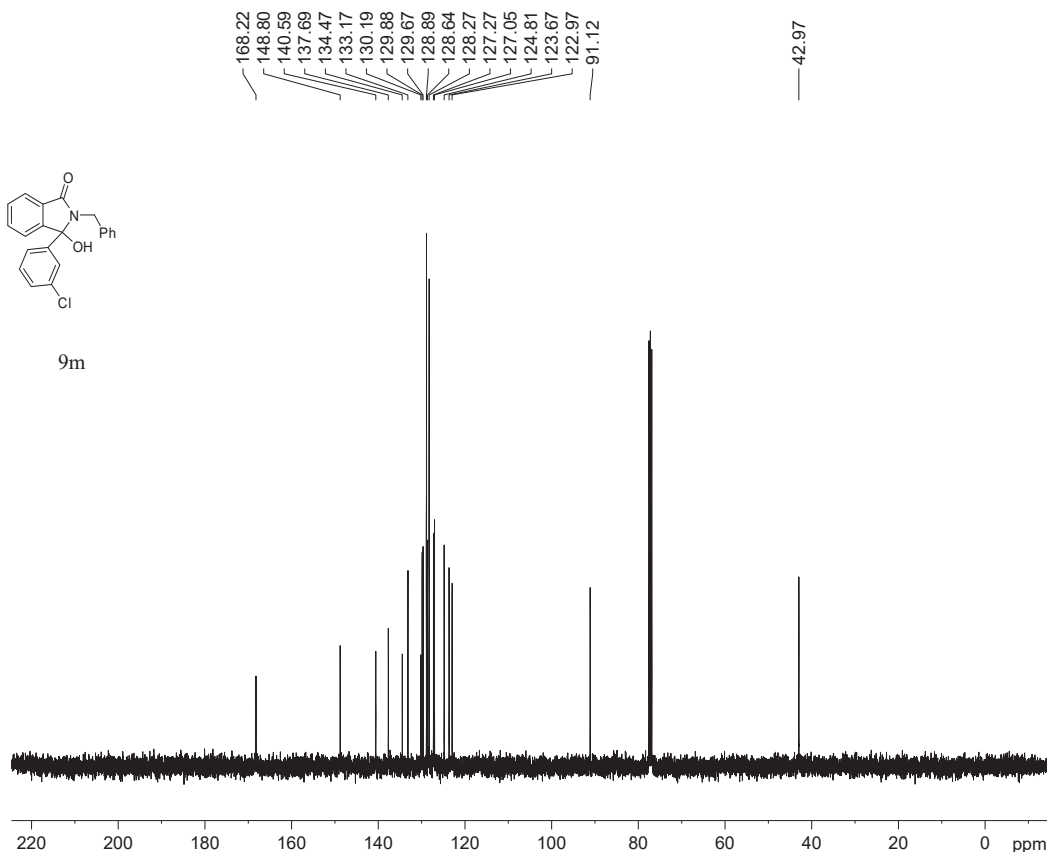

Current Data Parameters  
 NAME 20140418  
 EXPNO 6  
 PROCNO 1

F2 - Acquisition Parameters  
 Date\_ 20140418  
 Time 15.36  
 INSTRUM spect  
 PROBHD 5 mm SEI 1H-13  
 PULPROG zgpg30  
 TD 32768  
 SOLVENT CDCl3  
 NS 116  
 DS 0  
 SWH 24038.461 Hz  
 FIDRES 0.733596 Hz  
 AQ 0.6815744 sec  
 RG 2048  
 DW 20.800 usec  
 DE 6.50 usec  
 TE 299.9 K  
 D1 2.0000000 sec  
 D11 0.03000000 sec  
 TDO 1

===== CHANNEL f1 =====  
 NUC1 13C  
 P1 15.50 usec  
 PL1 7.30 dB  
 SFO1 100.6233325 MHz

===== CHANNEL f2 =====  
 CPDPRG2 waltz16  
 NUC2 1H  
 PCPD2 90.00 usec  
 PL2 -4.20 dB  
 PL12 13.10 dB  
 PL13 16.10 dB  
 SFO2 400.1316005 MHz

F2 - Processing parameters  
 SI 32768  
 SF 100.6127506 MHz  
 WDW EM  
 SSB 0  
 LB 1.00 Hz  
 GB 0  
 PC 1.00

## 2-Benzyl-3-(4-fluorophenyl)-3-hydroxyisoindolin-1-one (3ag)

<sup>1</sup>H of 4-F BnCN final product

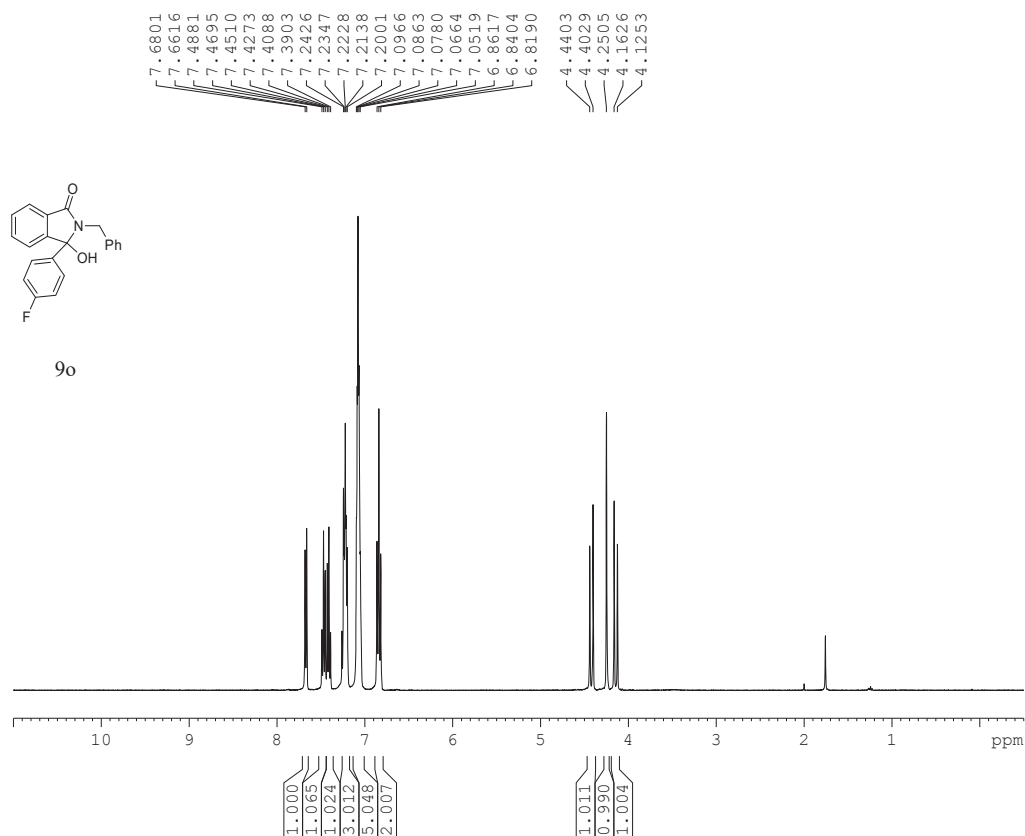

```
Current Data Parameters
NAME      20140415
EXPNO    3
PROCNO   1

F2 - Acquisition Parameters
Date_    20140415
Time     21.50
INSTRUM  spect
PROBHD   5 mm BBO BB-1H
PULPROG  zg30
TD        32768
SOLVENT  CDCl3
NS        8
DS        0
SWH      7246.377 Hz
FIDRES   0.221142 Hz
AQ        2.260921 sec
RG        114
DW        69.000 usec
DE        6.50 usec
TE        300.3 K
D1        2.0000000 sec
TD0       1

===== CHANNEL f1 =====
NUC1      1H
P1        14.35 usec
PL1       -2.00 dB
SFO1     400.1324008 MHz

F2 - Processing parameters
SI        16384
SF        400.1300094 MHz
WDW       EM
SSB       0
LB        0 Hz
GB        0
PC        1.00
```

## 2-Benzyl-3-(4-fluorophenyl)-3-hydroxyisoindolin-1-one (3ag)

2

<sup>13</sup>C of 4-F BnCN final product

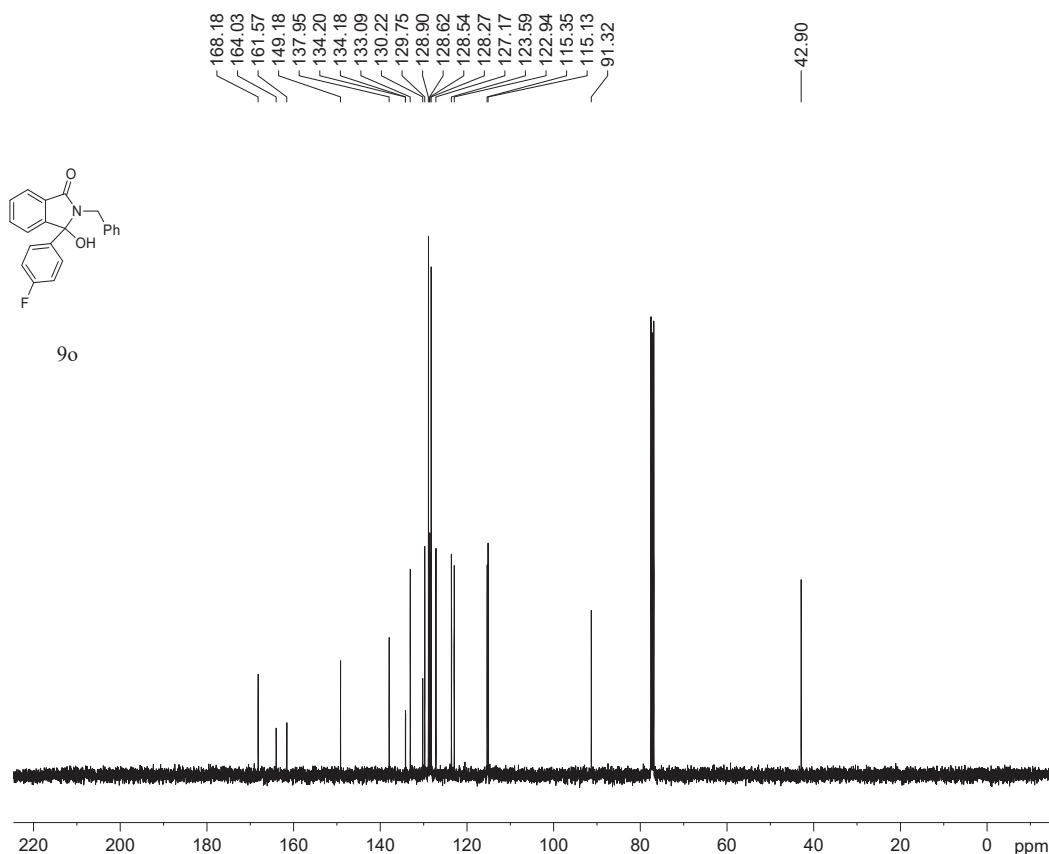

```
Current Data Parameters
NAME      20140415
EXPNO    4
PROCNO   1

F2 - Acquisition Parameters
Date_    20140415
Time     21.52
INSTRUM  spect
PROBHD   5 mm BBO BB-1H
PULPROG  zgpg30
TD        32768
SOLVENT  CDCl3
NS        134
DS        0
SWH      24038.461 Hz
FIDRES   0.733596 Hz
AQ        0.6815744 sec
RG        4096
DW        20.800 usec
DE        6.50 usec
TE        300.6 K
D1        2.0000000 sec
D11      0.0300000 sec
TD0       1

===== CHANNEL f1 =====
NUC1      13C
P1        9.40 usec
PL1       7.00 dB
SFO1     100.6233325 MHz

===== CHANNEL f2 =====
CPDPRG2  waltz16
NUC2      1H
PCPD2    90.00 usec
PL2      -2.00 dB
PL12     13.95 dB
PL13     17.00 dB
SFO2     400.1316005 MHz

F2 - Processing parameters
SI        32768
SF        100.6127506 MHz
WDW       EM
SSB       0
LB        1.00 Hz
GB        0
PC        1.00
```

## 2-Benzyl-3-(4-chlorophenyl)-3-hydroxyisoindolin-1-one (3ah)

<sup>1</sup>H of 4-Cl BnCN final product

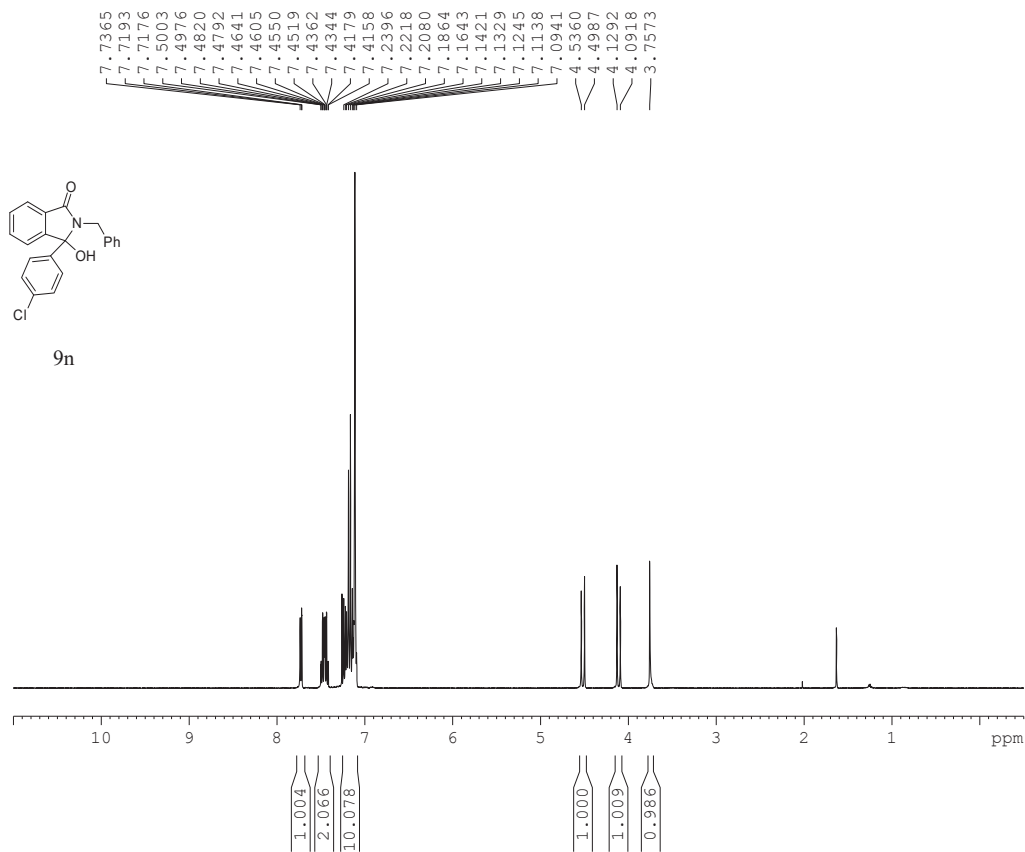

```
Current Data Parameters
NAME      20131206
EXPNO    5
PROCNO   1

F2 - Acquisition Parameters
Date_    20131206
Time     10.25
INSTRUM  spect
PROBHD   5 mm BBO BB-1H
PULPROG  zg30
TD        32768
SOLVENT  CDCl3
NS        8
DS        0
SWH       7246.377 Hz
FIDRES    0.221142 Hz
AQ        2.2609921 sec
RG        328.1
DW        69.000 usec
DE        6.50 usec
TE        295.9 K
D1        2.0000000 sec
TD0       1

===== CHANNEL f1 =====
NUC1      1H
P1        11.90 usec
PL1       3.00 dB
SFO1     400.1324008 MHz

F2 - Processing parameters
SI        16384
SF        400.1300093 MHz
WDW       EM
SSB       0
LB        0 Hz
GB        0
PC        1.00
```

## 2-Benzyl-3-(4-chlorophenyl)-3-hydroxyisoindolin-1-one (3ah)

<sup>13</sup>C of 4-Cl BnCN final product

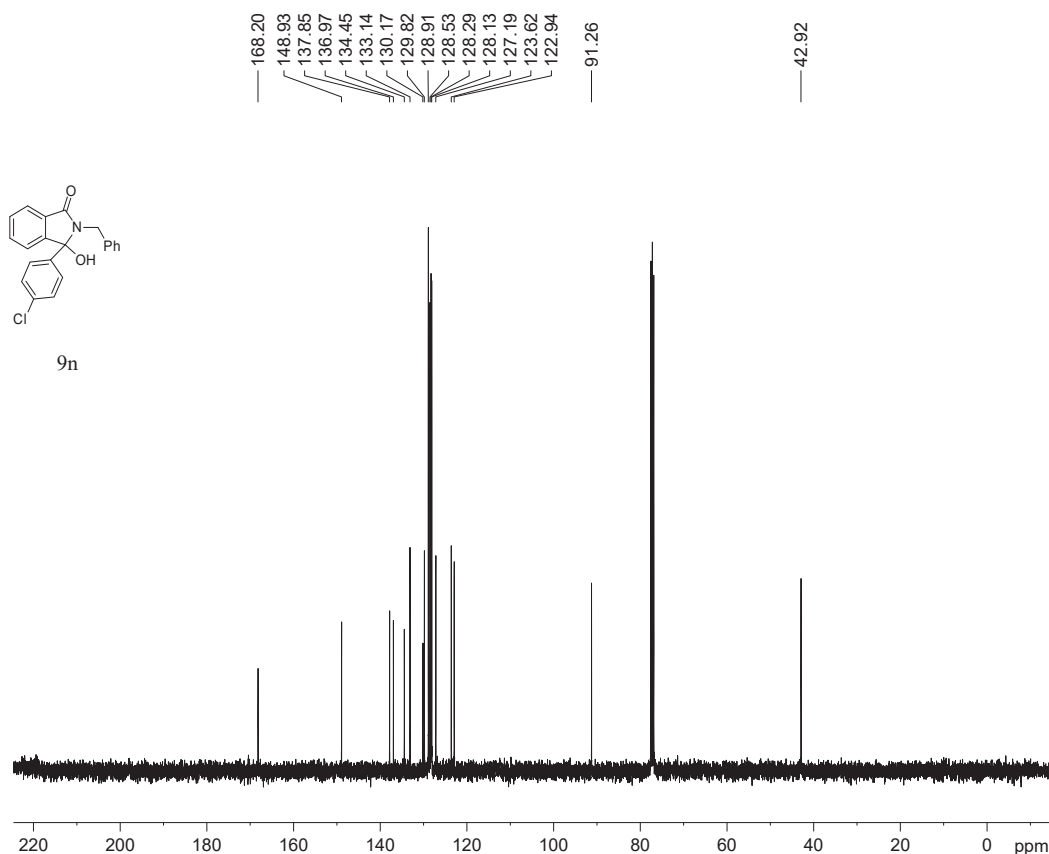

```
Current Data Parameters
NAME      20131206
EXPNO    11
PROCNO   1

F2 - Acquisition Parameters
Date_    20131206
Time     11.44
INSTRUM  spect
PROBHD   5 mm BBO BB-1H
PULPROG  zgpg30
TD        32768
SOLVENT  CDCl3
NS        105
DS        0
SWH       24038.461 Hz
FIDRES    0.733596 Hz
AQ        0.6815744 sec
RG        4096
DW        20.800 usec
DE        6.50 usec
TE        295.9 K
D1        2.0000000 sec
D11      0.03000000 sec
TD0       1

===== CHANNEL f1 =====
NUC1      13C
P1        9.40 usec
PL1       7.00 dB
SFO1     100.6233325 MHz

===== CHANNEL f2 =====
CPDPRG2  waltz16
NUC2      1H
PCPD2    90.00 usec
PL2      3.00 dB
PL12     20.70 dB
PL13     23.70 dB
SFO2     400.1316005 MHz

F2 - Processing parameters
SI        32768
SF        100.6127514 MHz
WDW       EM
SSB       0
LB        1.00 Hz
GB        0
PC        1.00
```

<sup>1</sup>H NMR spectra of 2-Benzyl-3-(4-bromophenyl)-3-hydroxyisoindolin-1-one (**3ai**)

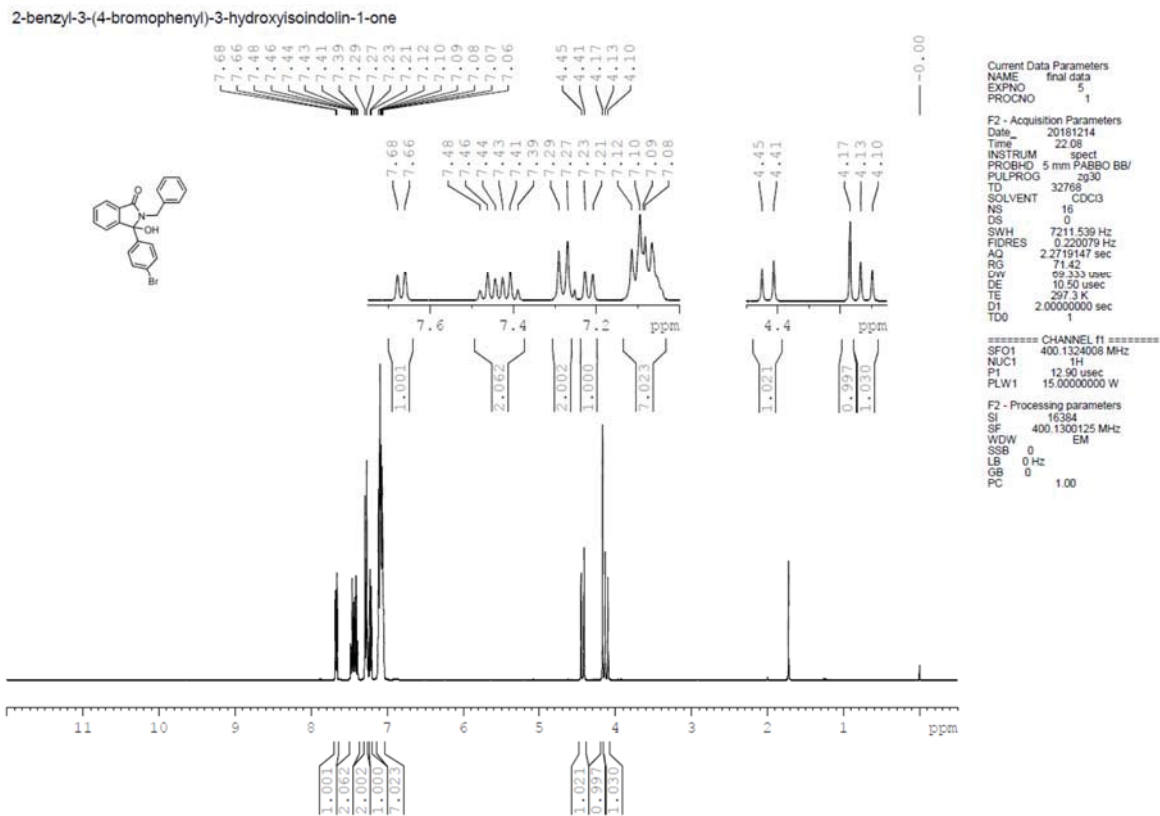

<sup>13</sup>C NMR spectra of 2-Benzyl-3-(4-bromophenyl)-3-hydroxyisoindolin-1-one (**3ai**)

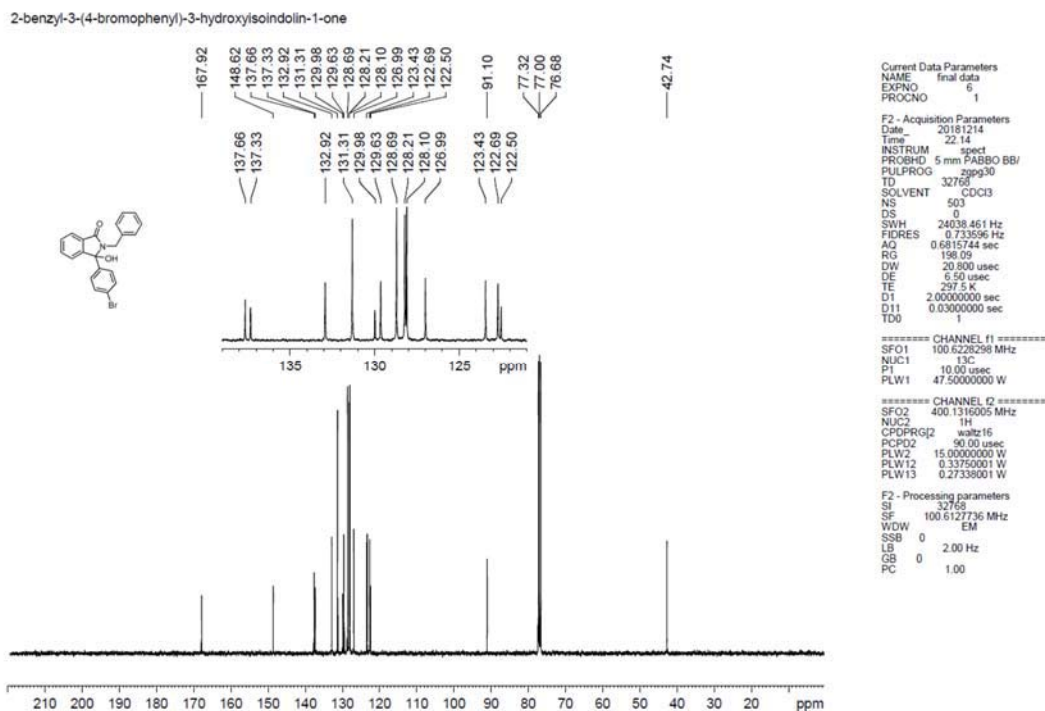

<sup>1</sup>H NMR spectra of 2-Benzyl-3-(2,4-dichlorophenyl)-3-hydroxyisoindolin-1-one (**3aj**)

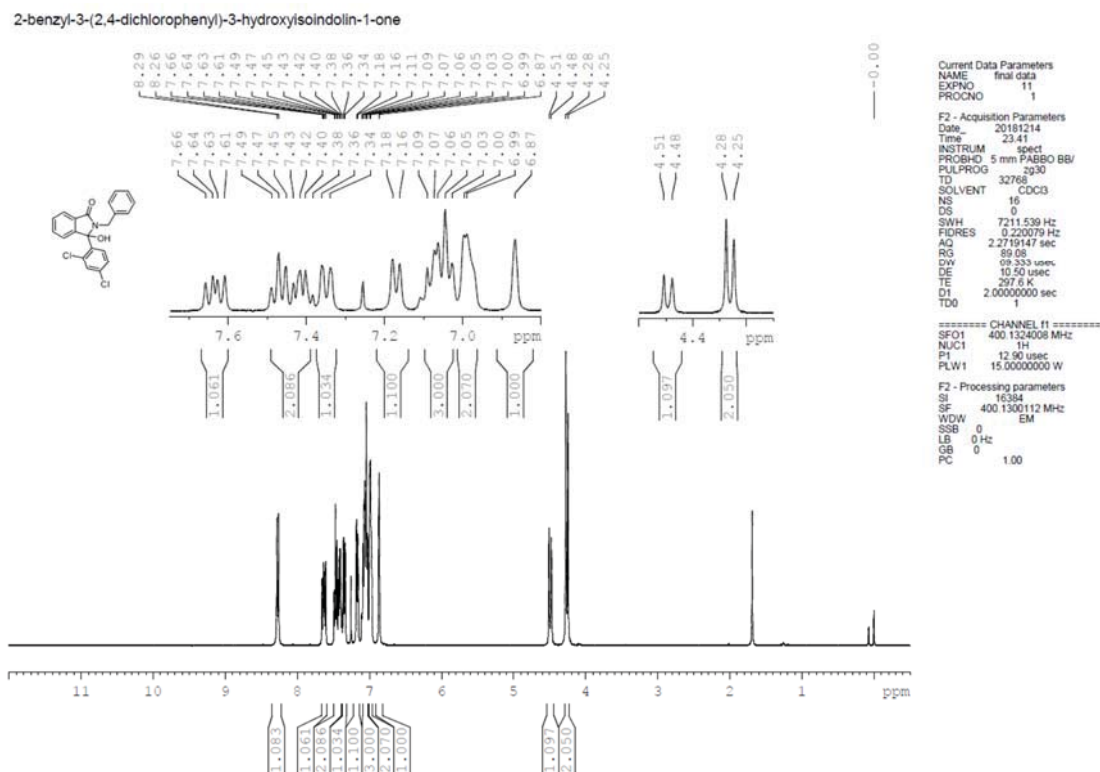

<sup>13</sup>C NMR spectra of 2-Benzyl-3-(2,4-dichlorophenyl)-3-hydroxyisoindolin-1-one (**3aj**)

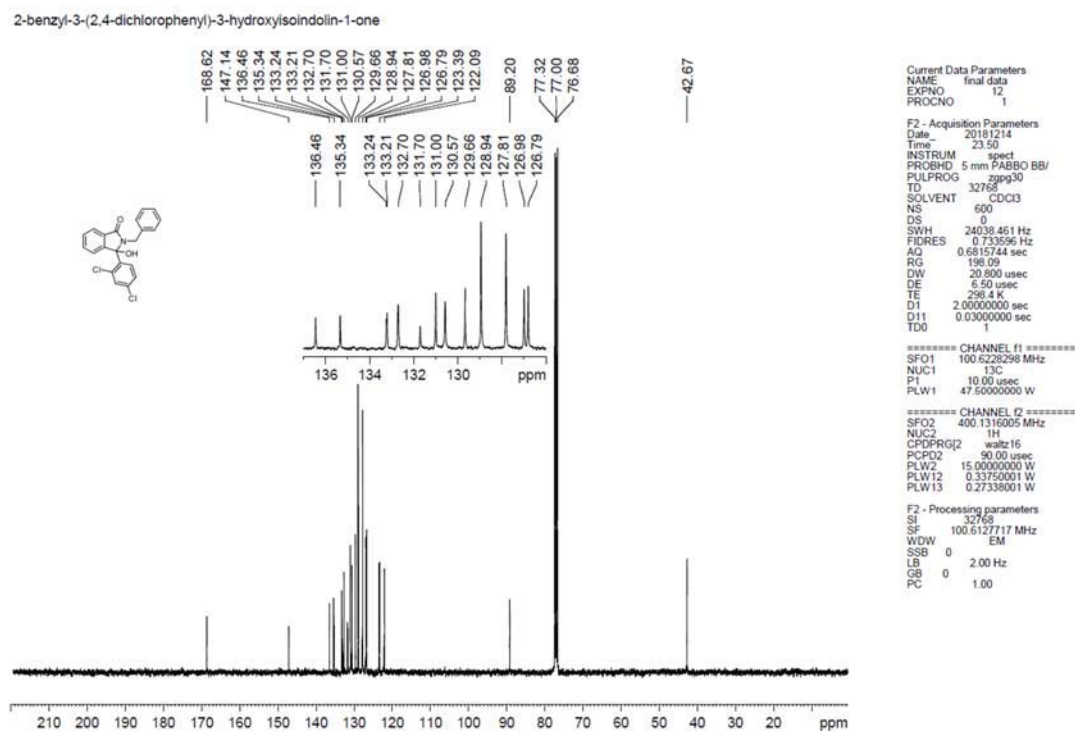



## 2-Benzyl-3-hydroxy-3-(4-(trifluoromethyl)phenyl)isoindolin-1-one (3ak)

1H of CF3 BnCN final product

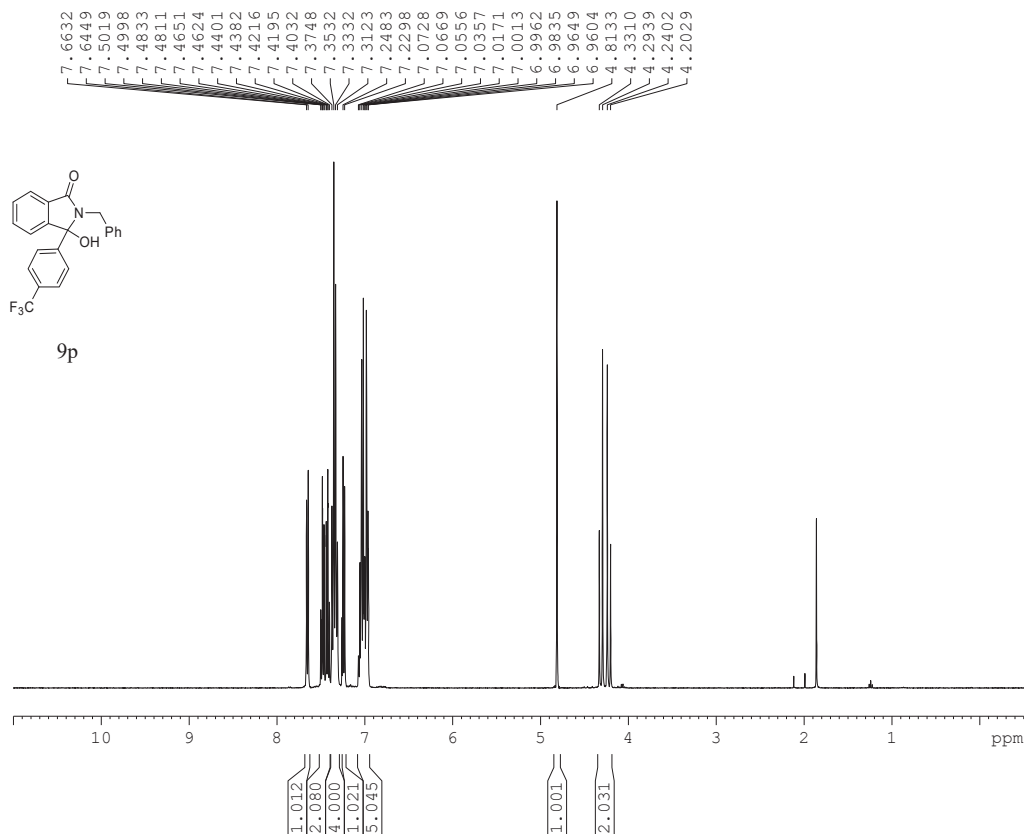

```
Current Data Parameters
NAME      20140418
EXPNO    3
PROCNO   1

F2 - Acquisition Parameters
Date_    20140418
Time     13.47
INSTRUM  spect
PROBHD   5 mm SEI 1H-13
PULPROG  zg30
TD        32768
SOLVENT  CDCl3
NS        8
DS        0
SWH       7246.377 Hz
FIDRES    0.221142 Hz
AQ        2.2609921 sec
RG        45.3
DW        69.000 usec
DE        6.50 usec
TE        299.8 K
D1        2.0000000 sec
TD0       1

===== CHANNEL f1 =====
NUC1      1H
P1        11.00 usec
PL1       -4.20 dB
SFO1     400.1324008 MHz

F2 - Processing parameters
SI        16384
SF        400.1300087 MHz
WDW       EM
SSB       0
LB        0 Hz
GB        0
PC        1.00
```

## 2-Benzyl-3-hydroxy-3-(4-(trifluoromethyl)phenyl)isoindolin-1-one (3ak)

13C of CF3 BnCN final product

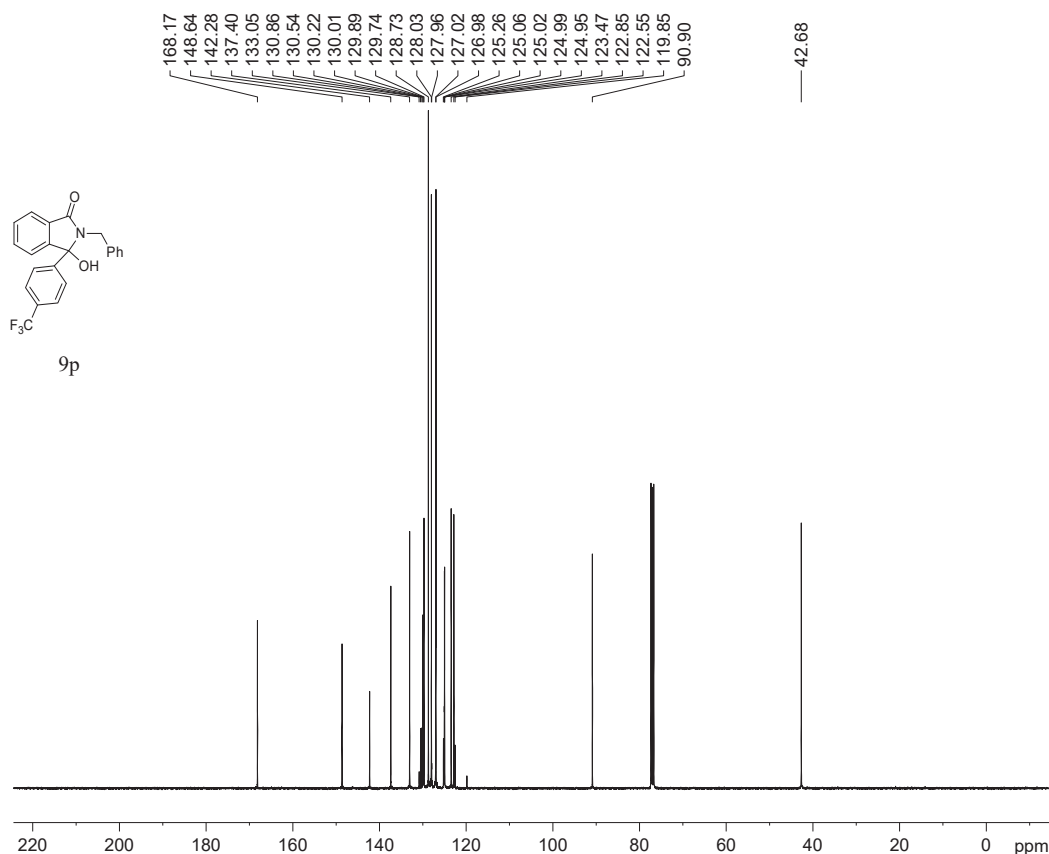

```
Current Data Parameters
NAME      20140418
EXPNO    22
PROCNO   1

F2 - Acquisition Parameters
Date_    20140419
Time     0.39
INSTRUM  spect
PROBHD   5 mm SEI 1H-13
PULPROG  zgpg30
TD        32768
SOLVENT  CDCl3
NS        10620
DS        0
SWH       24038.461 Hz
FIDRES    0.733596 Hz
AQ        0.6815744 sec
RG        2048
DW        20.800 usec
DE        6.50 usec
TE        300.1 K
D1        2.0000000 sec
D11      0.03000000 sec
TD0       1

===== CHANNEL f1 =====
NUC1      13C
P1        15.50 usec
PL1       7.30 dB
SFO1     100.6233325 MHz

===== CHANNEL f2 =====
CPDPRG2  waltz16
NUC2      1H
PCPD2    90.00 usec
PL2      -4.20 dB
PL12     13.10 dB
PL13     16.10 dB
SFO2     400.1316005 MHz

F2 - Processing parameters
SI        32768
SF        100.6127690 MHz
WDW       EM
SSB       0
LB        1.00 Hz
GB        0
PC        1.00
```

## 2-Benzyl-3-hydroxy-3-(4-nitrophenyl)isoindolin-1-one (3a)

<sup>1</sup>H of 4-NO<sub>2</sub> BnCN final product

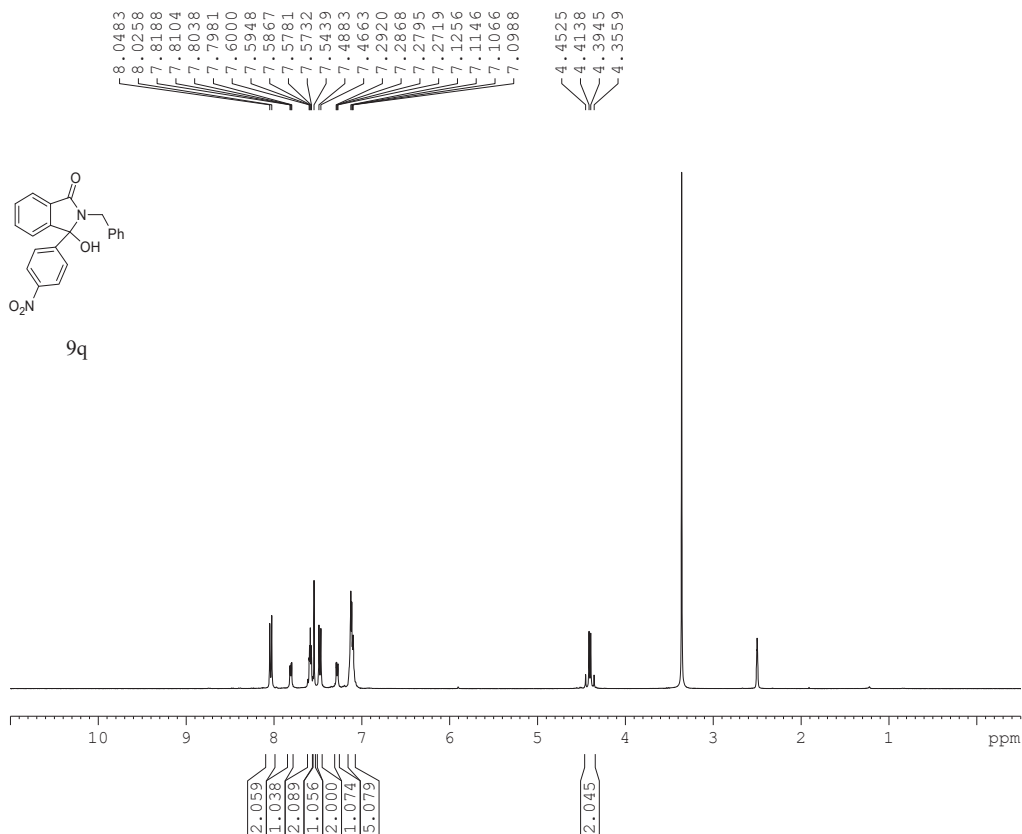

```
Current Data Parameters
NAME      20140430
EXPNO    1
PROCNO   1

F2 - Acquisition Parameters
Date_    20140430
Time     20.55
INSTRUM spect
PROBHD   5 mm PABBO BB/
PULPROG zg30
TD       32768
SOLVENT  DMSO
NS       8
DS       0
SWH      7211.539 Hz
FIDRES   0.220079 Hz
AQ       2.2719147 sec
RG       71.42
DW       69.333 usec
DE       10.52 usec
TE       298.2 K
D1       2.0000000 sec
TD0      1

===== CHANNEL f1 =====
SFO1    400.1324008 MHz
NUC1     1H
P1      12.80 usec
PLW1    15.0000000 W

F2 - Processing parameters
SI      16384
SF      400.1300031 MHz
WDW     EM
SSB     0
LB      0 Hz
GB      0
PC      1.00
```

## 2-Benzyl-3-hydroxy-3-(4-nitrophenyl)isoindolin-1-one (3a)

<sup>13</sup>C of 4-NO<sub>2</sub> BnCN final product

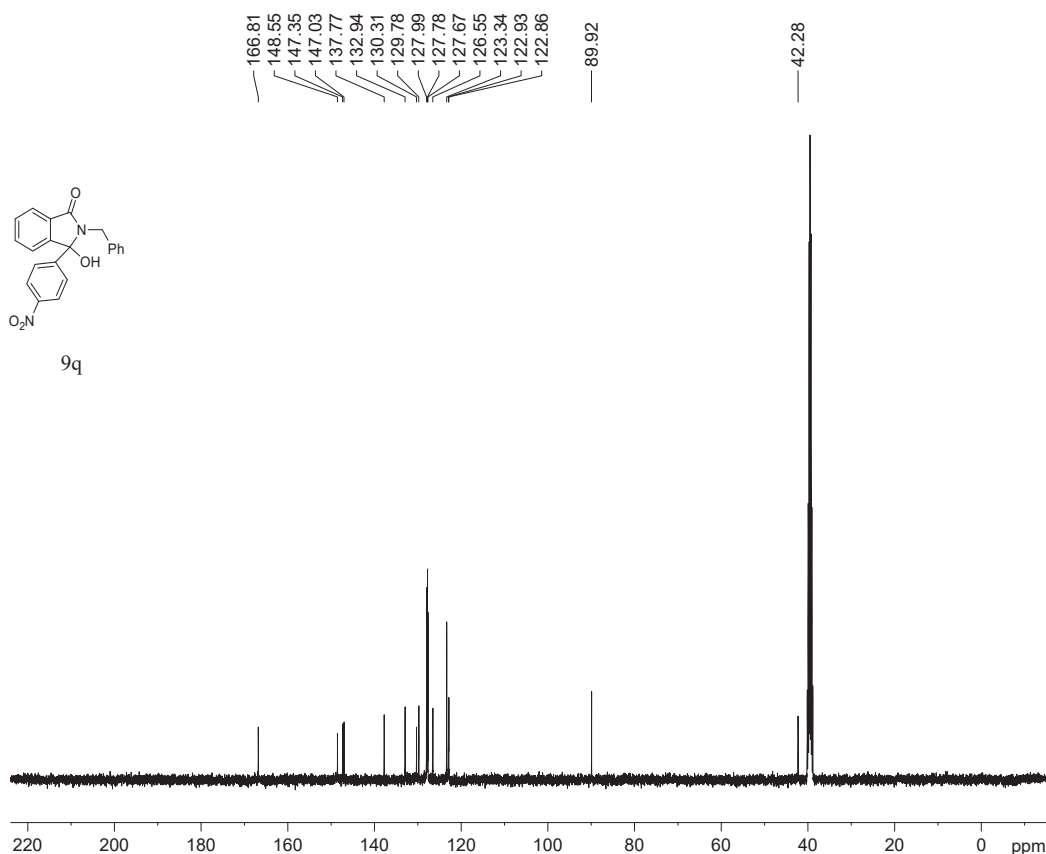

```
Current Data Parameters
NAME      20140502
EXPNO    2
PROCNO   1

F2 - Acquisition Parameters
Date_    20140502
Time     16.52
INSTRUM spect
PROBHD   5 mm SEI 1H-13
PULPROG zgpg30
TD       32768
SOLVENT  DMSO
NS       499
DS       0
SWH      24038.461 Hz
FIDRES   0.733596 Hz
AQ       0.6815744 sec
RG       4096
DW       20.800 usec
DE       6.50 usec
TE       299.2 K
D1       2.0000000 sec
D11     0.0300000 sec
TD0      1

===== CHANNEL f1 =====
NUC1     13C
P1      15.50 usec
PL1     7.30 dB
SFO1    100.6233325 MHz

===== CHANNEL f2 =====
CPDPRG2  waltz16
NUC2     1H
PCPD2   90.00 usec
PL2     -4.20 dB
PL12    13.10 dB
PL13    16.10 dB
SFO2    400.1316005 MHz

F2 - Processing parameters
SI      32768
SF      100.6128154 MHz
WDW     EM
SSB     0
LB      1.00 Hz
GB      0
PC      1.00
```

# 1H NMR of 3-Hydroxy-2-methyl-3-phenylisoindolin-1-one (3ba)

1H of methyl final

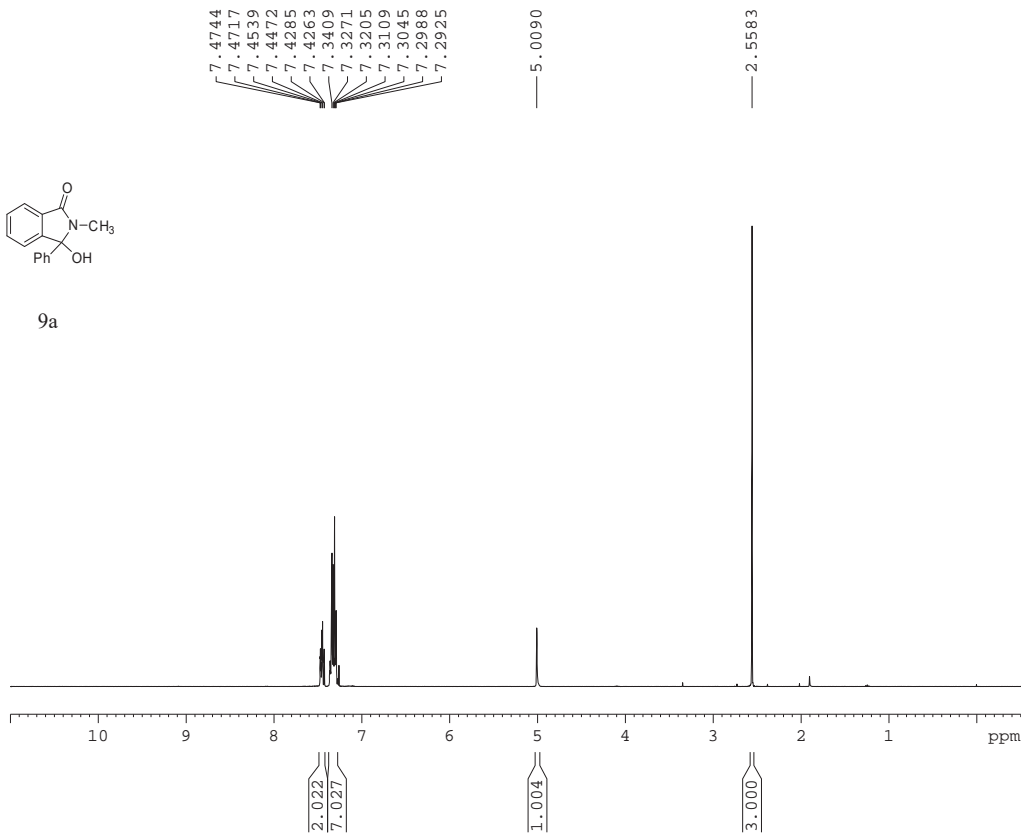

```
Current Data Parameters
NAME      20131019
EXPNO    5
PROCNO   1

F2 - Acquisition Parameters
Date_    20131019
Time     15.55
INSTRUM  SPECT
PROBHD   5 mm PABBO BB/
PULPROG  zg30
TD        32768
SOLVENT  CDCl3
NS        1
DS        0
SWH       7211.539 Hz
FIDRES    0.220079 Hz
AQ         2.2719147 sec
RG         63.58
DW         69.333 usec
DE         10.52 usec
TE         298.8 K
D1         2.0000000 sec
TD0        1

===== CHANNEL f1 =====
SFO1     400.1324008 MHz
NUC1      1H
P1        12.80 usec
PLW1     15.0000000 W

F2 - Processing parameters
SI        16384
SF        400.1300093 MHz
WDW       EM
SSB       0
LB        0 Hz
GB        0
PC        1.00
```

# 13C NMR of 3-Hydroxy-2-methyl-3-phenylisoindolin-1-one (3ba)

13C of methyl final

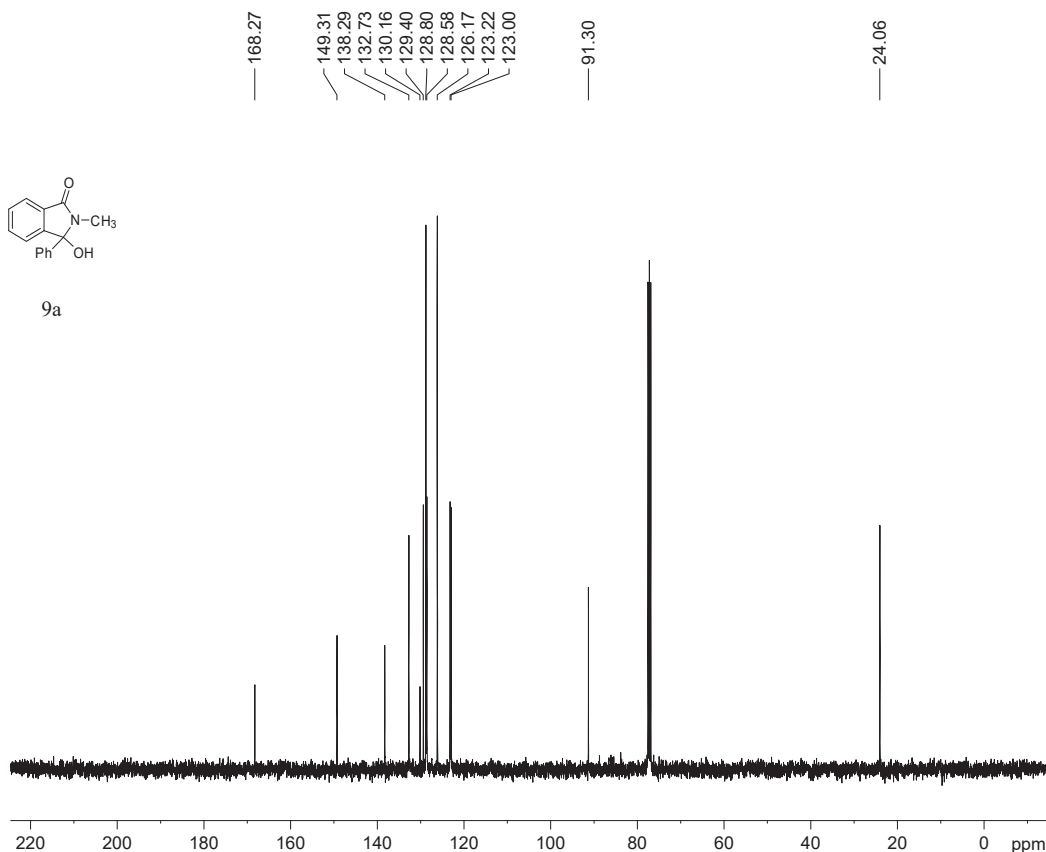

```
Current Data Parameters
NAME      20131019
EXPNO    6
PROCNO   1

F2 - Acquisition Parameters
Date_    20131019
Time     15.56
INSTRUM  SPECT
PROBHD   5 mm PABBO BB/
PULPROG  zgpg30
TD        32768
SOLVENT  CDCl3
NS        50
DS        0
SWH       24038.461 Hz
FIDRES    0.733596 Hz
AQ         0.6815744 sec
RG         198.09
DW         20.800 usec
DE         6.50 usec
TE         299.0 K
D1         2.0000000 sec
D11       0.03000000 sec
TD0        1

===== CHANNEL f1 =====
SFO1     100.6233324 MHz
NUC1     13C
P1        10.00 usec
PLW1     46.0000000 W

===== CHANNEL f2 =====
SFO2     400.1316005 MHz
NUC2      1H
CPDPRG2  waltz16
PCPD2    90.00 usec
PLW2     15.0000000 W
PLW12    0.34252000 W
PLW13    0.27744001 W

F2 - Processing parameters
SI        32768
SF        100.6127497 MHz
WDW       EM
SSB       0
LB        2.00 Hz
GB        0
PC        1.00
```

<sup>1</sup>H NMR spectra of 3-hydroxy-2-isopropyl-3-phenylisoindolin-1-one (**3ca**)

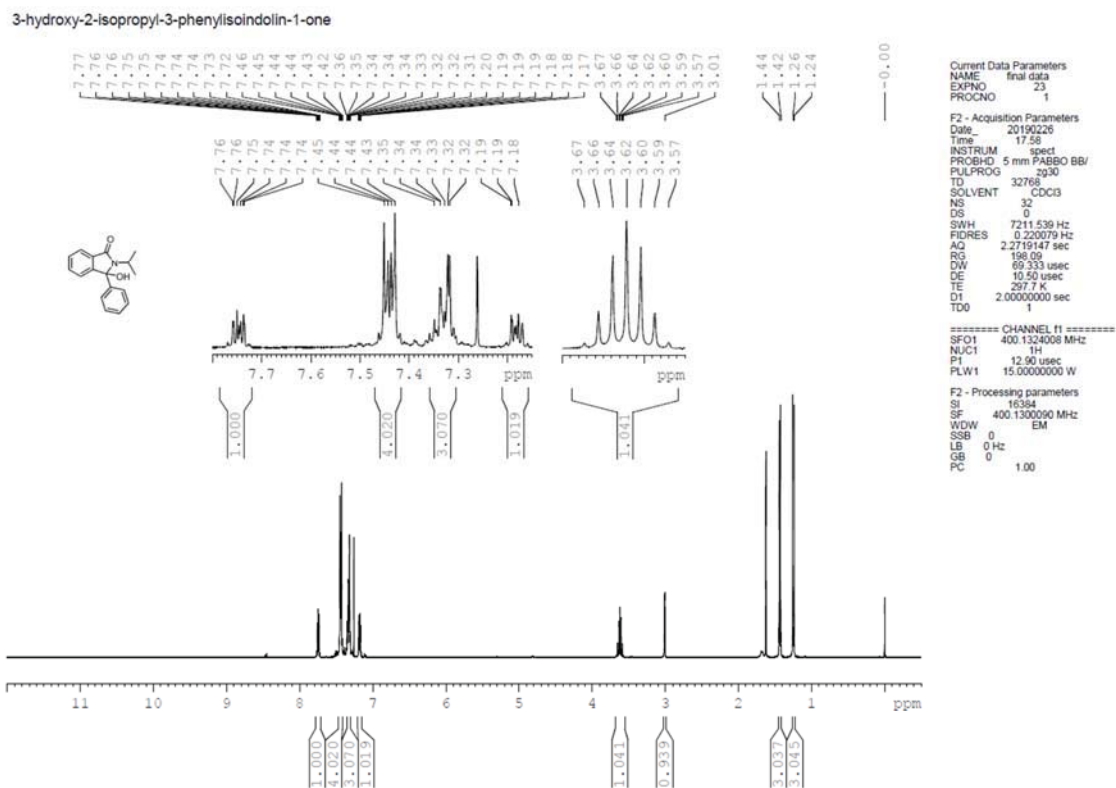

<sup>13</sup>C NMR spectra of 3-hydroxy-2-isopropyl-3-phenylisoindolin-1-one (**3ca**)

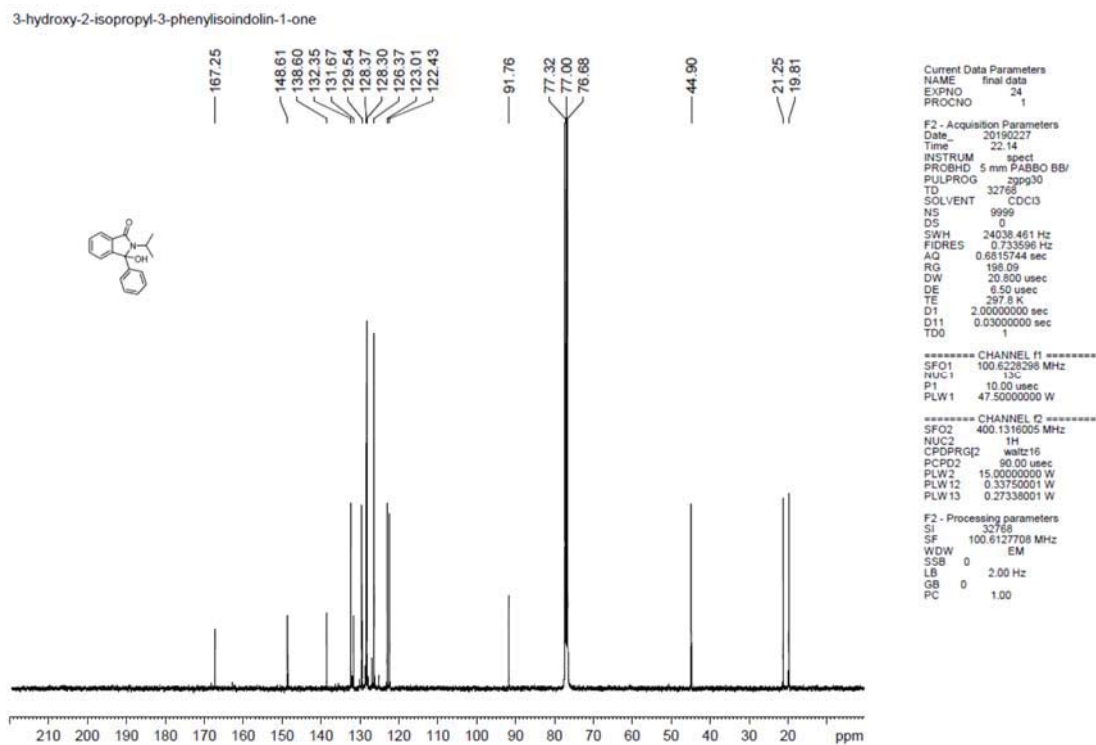

# 1H NMR of 3-Hydroxy-2,3-diphenylisoindolin-1-one (3da)

1H

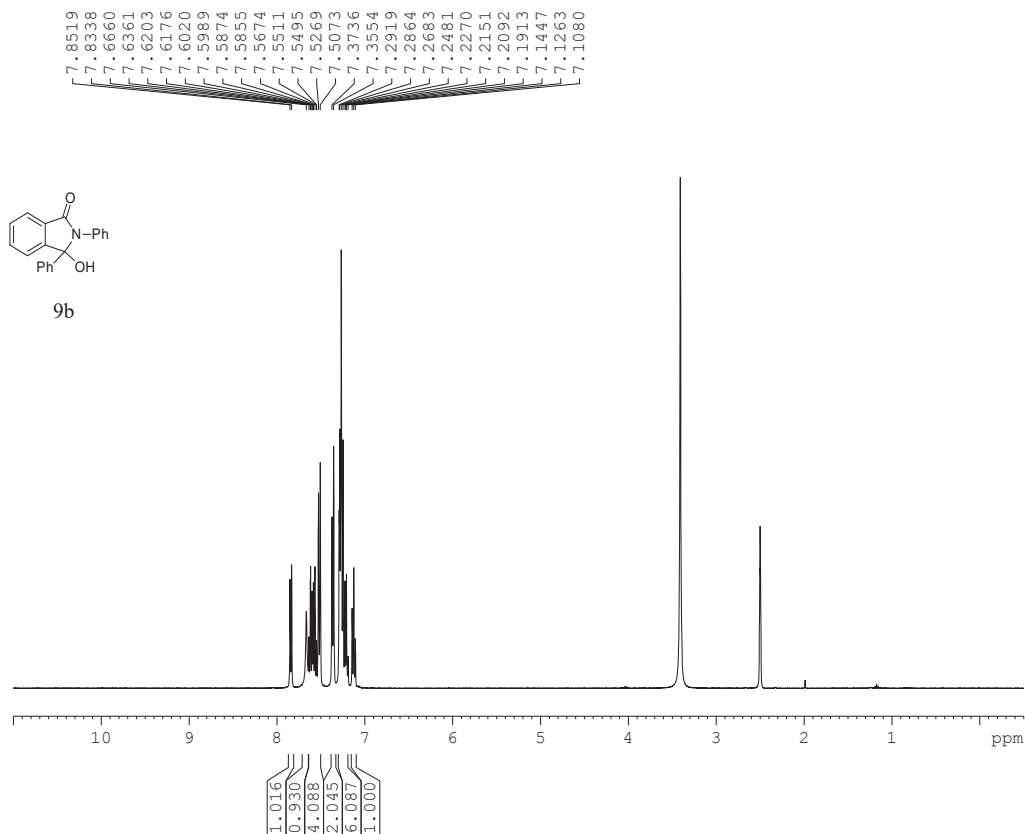

```
Current Data Parameters
NAME      20140106
EXPNO     1
PROCNO    1

F2 - Acquisition Parameters
Date_     20140106
Time      14.38
INSTRUM   spect
PROBHD    5 mm PABBO BB/
PULPROG   zg30
TD         32768
SOLVENT   DMSO
NS         4
DS         0
SWH        7211.539 Hz
FIDRES     0.220079 Hz
AQ         2.2719147 sec
RG         71.42
DW         69.333 usec
DE         10.52 usec
TE         297.6 K
D1         2.00000000 sec
TD0        1

===== CHANNEL f1 =====
SFO1      400.1324008 MHz
NUC1       1H
P1         12.80 usec
PLW1       15.00000000 W

F2 - Processing parameters
SI         16384
SF         400.1300031 MHz
WDW        EM
SSB        0
LB         0 Hz
GB         0
PC         1.00
```

# 13C NMR of 3-Hydroxy-2,3-diphenylisoindolin-1-one (3da)

13C of

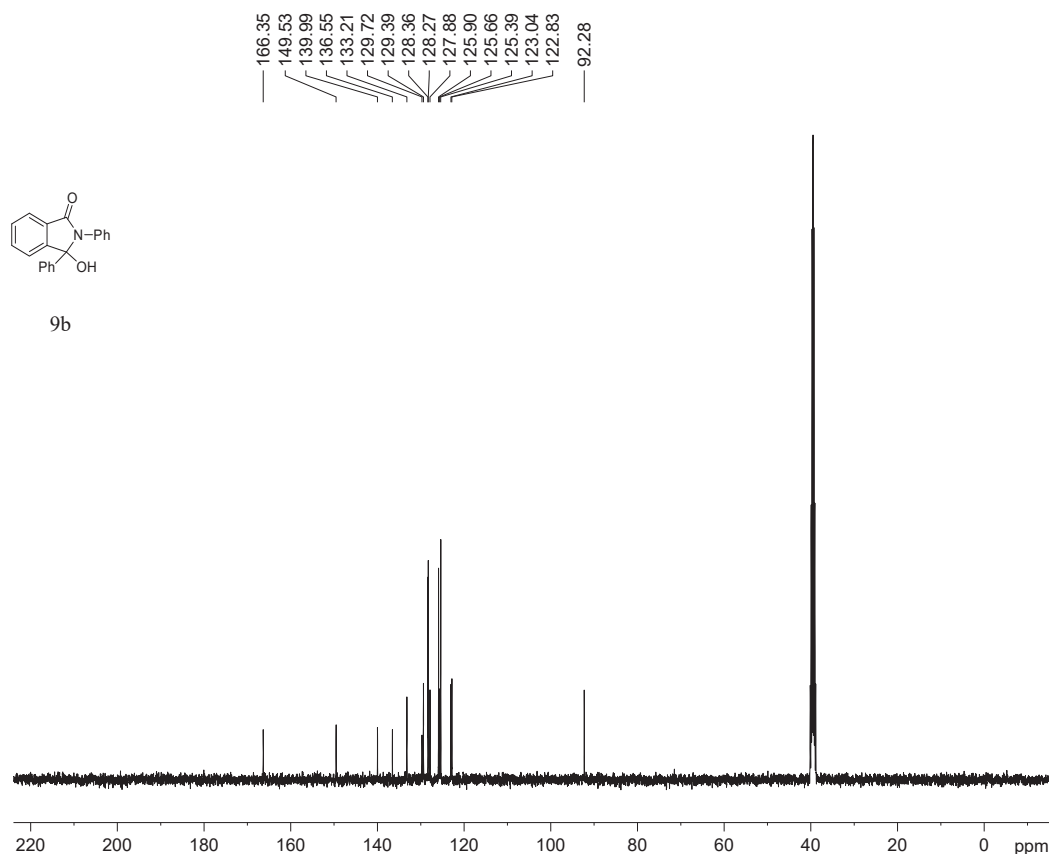

```
Current Data Parameters
NAME      20140106
EXPNO     2
PROCNO    1

F2 - Acquisition Parameters
Date_     20140106
Time      14.39
INSTRUM   spect
PROBHD    5 mm PABBO BB/
PULPROG   zgpg30
TD         32768
SOLVENT   DMSO
NS         66
DS         0
SWH        24038.461 Hz
FIDRES     0.733596 Hz
AQ         0.6815744 sec
RG         198.09
DW         20.800 usec
DE         6.50 usec
TE         297.7 K
D1         2.00000000 sec
D11        0.03000000 sec
TD0        1

===== CHANNEL f1 =====
SFO1      100.6233324 MHz
NUC1       13C
P1         10.00 usec
PLW1       46.00000000 W

===== CHANNEL f2 =====
SFO2      400.1316005 MHz
NUC2       1H
CPDPRG2   waltz16
PCPD2     90.00 usec
PLW2      15.00000000 W
PLW12     0.34252000 W
PLW13     0.27744001 W

F2 - Processing parameters
SI         32768
SF         100.6128170 MHz
WDW        EM
SSB        0
LB         2.00 Hz
GB         0
PC         1.00
```

### 3-Hydroxy-2-phenethyl-3-phenylisoindolin-1-one (3ea)

1H of N-ethylphenyl final product

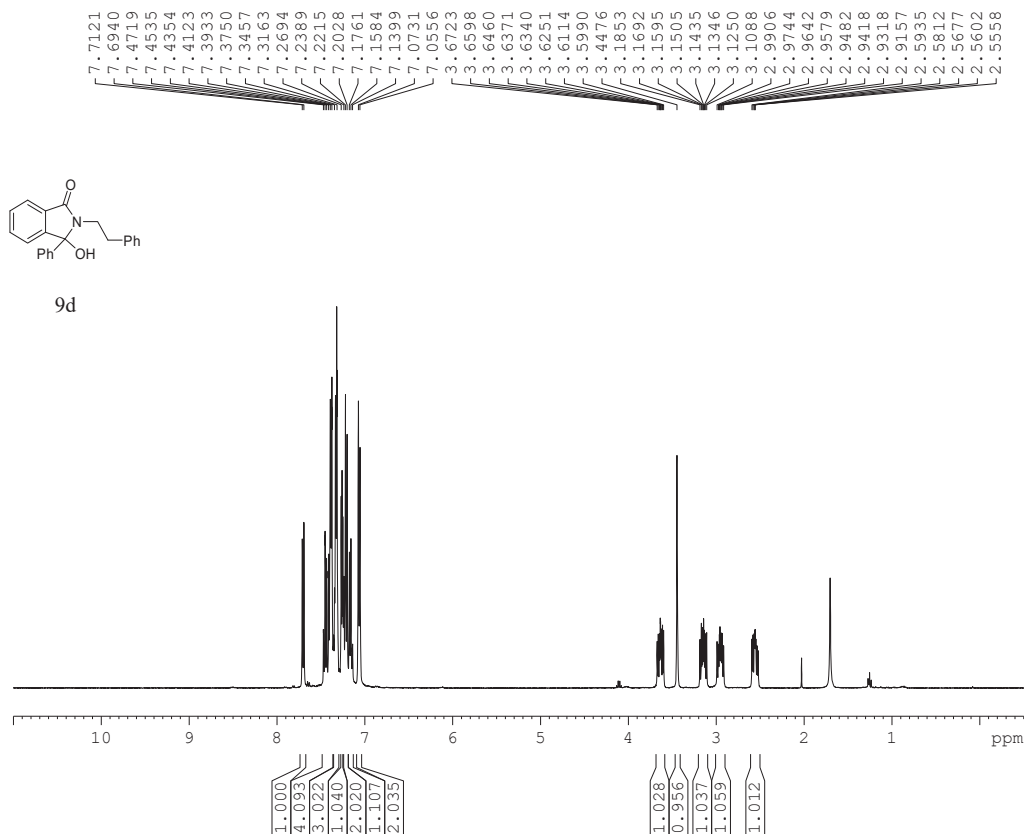

```
Current Data Parameters
NAME      20140418
EXPNO    14
PROCNO   1

F2 - Acquisition Parameters
Date_    20140418
Time     22.10
INSTRUM spect
PROBHD   5 mm SEI 1H-13
PULPROG zg30
TD       32768
SOLVENT  CDCl3
NS       16
DS       0
SWH      7246.377 Hz
FIDRES   0.221142 Hz
AQ       2.2609921 sec
RG       114
DW       69.000 usec
DE       6.50 usec
TE       299.6 K
D1       2.0000000 sec
TD0      1

===== CHANNEL f1 =====
NUC1     1H
P1       11.00 usec
PL1      -4.20 dB
SFO1    400.1324008 MHz

F2 - Processing parameters
SI       16384
SF       400.1300091 MHz
WDW      EM
SSB      0
LB       0 Hz
GB       0
PC       1.00
```

### 3-Hydroxy-2-phenethyl-3-phenylisoindolin-1-one (3ea)

3-hydroxy-2-phenethyl-3-phenylisoindolin-1-e

13C of N-ethylphenyl final product

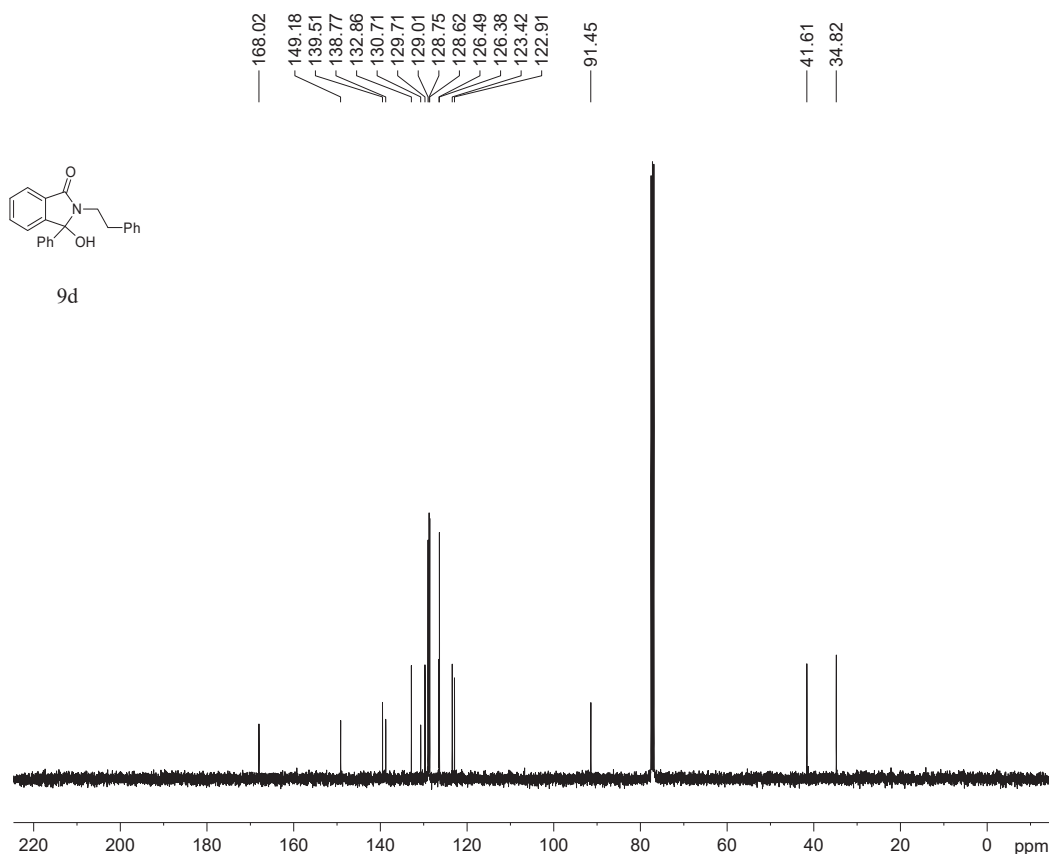

```
Current Data Parameters
NAME      20140418
EXPNO    15
PROCNO   1

F2 - Acquisition Parameters
Date_    20140418
Time     22.13
INSTRUM spect
PROBHD   5 mm SEI 1H-13
PULPROG zgpg30
TD       32768
SOLVENT  CDCl3
NS       500
DS       0
SWH      24038.461 Hz
FIDRES   0.733596 Hz
AQ       0.6815744 sec
RG       4096
DW       20.800 usec
DE       6.50 usec
TE       299.9 K
D1       2.0000000 sec
D11     0.0300000 sec
TD0      1

===== CHANNEL f1 =====
NUC1     13C
P1       15.50 usec
PL1      7.30 dB
SFO1    100.6233325 MHz

===== CHANNEL f2 =====
CPDPRG2  waltz16
NUC2     1H
PCPD2   90.00 usec
PL2     -4.20 dB
PL12    13.10 dB
PL13    16.10 dB
SFO2    400.1316005 MHz

F2 - Processing parameters
SI       32768
SF       100.6127484 MHz
WDW      EM
SSB      0
LB       1.00 Hz
GB       0
PC       1.00
```

# 3-Hydroxy-3-phenyl-2-(4-phenylbutyl)isoindolin-1-one (3fa)

1H of butyl phenyl final

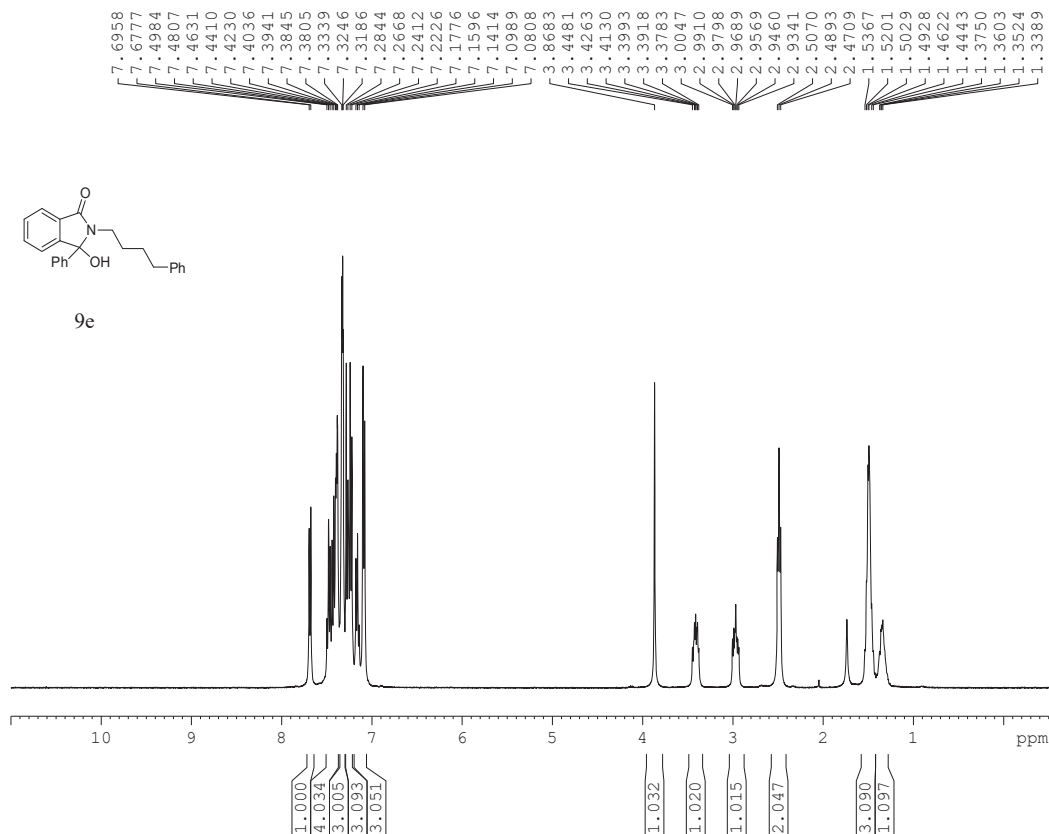

Current Data Parameters  
 NAME 20131112  
 EXPNO 3  
 PROCNO 1

F2 - Acquisition Parameters  
 Date\_ 20131112  
 Time 21.40  
 INSTRUM SPECT  
 PROBHD 5 mm PABBO BB/  
 PULPROG zg30  
 TD 32768  
 SOLVENT CDCl3  
 NS 8  
 DS 0  
 SWH 7211.539 Hz  
 FIDRES 0.220079 Hz  
 AQ 2.2719147 sec  
 RG 71.42  
 DW 69.333 usec  
 DE 10.52 usec  
 TE 298.6 K  
 D1 2.0000000 sec  
 TDO 1

===== CHANNEL f1 =====  
 SFO1 400.1324008 MHz  
 NUC1 1H  
 P1 12.80 usec  
 PLW1 15.0000000 W

F2 - Processing parameters  
 SI 16384  
 SF 400.1300000 MHz  
 WDW EM  
 SSB 0  
 LB 0 Hz  
 GB 0  
 PC 1.00

# 3-Hydroxy-3-phenyl-2-(4-phenylbutyl)isoindolin-1-one (3fa)

3-hydroxy-3-phenyl-2-(4-phenylbutyl)isoindolin-1-one

13C of butyl phenyl final

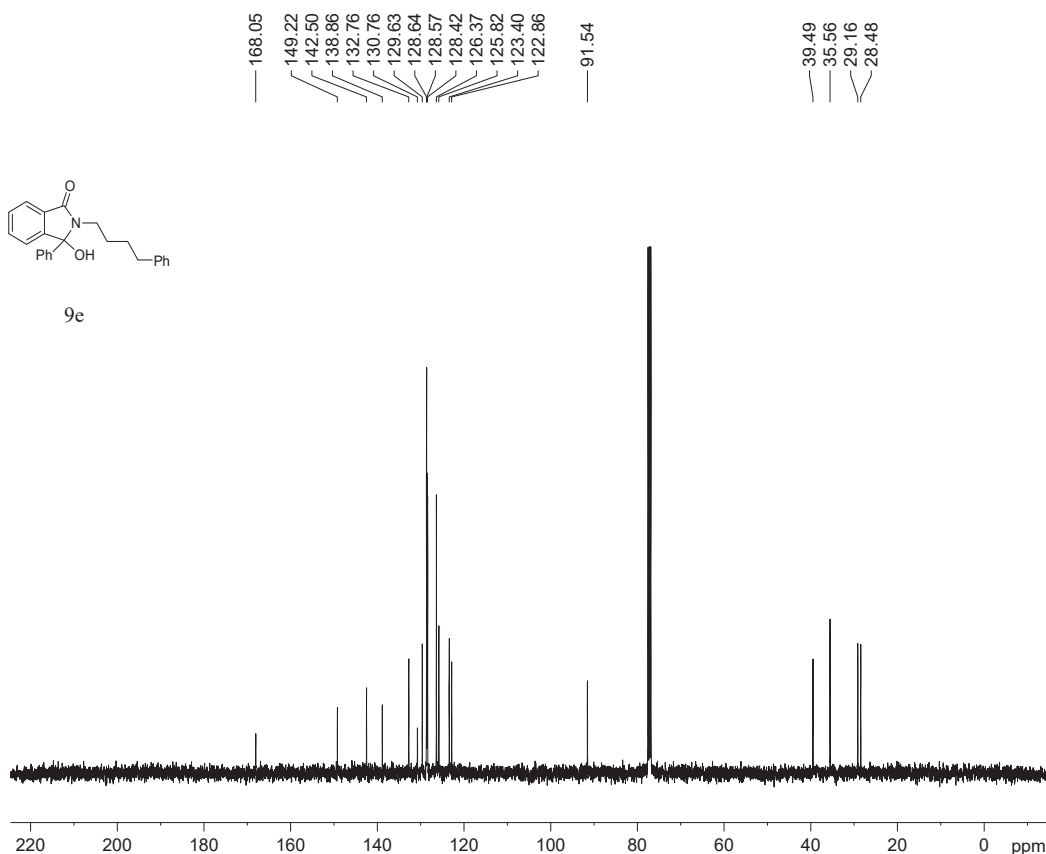

Current Data Parameters  
 NAME 20131112  
 EXPNO 4  
 PROCNO 1

F2 - Acquisition Parameters  
 Date\_ 20131112  
 Time 21.42  
 INSTRUM SPECT  
 PROBHD 5 mm PABBO BB/  
 PULPROG zgpg30  
 TD 32768  
 SOLVENT CDCl3  
 NS 100  
 DS 0  
 SWH 24038.461 Hz  
 FIDRES 0.733596 Hz  
 AQ 0.6815744 sec  
 RG 198.09  
 DW 20.800 usec  
 DE 6.50 usec  
 TE 298.9 K  
 D1 2.0000000 sec  
 D11 0.03000000 sec  
 TDO 1

===== CHANNEL f1 =====  
 SFO1 100.6233324 MHz  
 NUC1 13C  
 P1 10.00 usec  
 PLW1 46.0000000 W

===== CHANNEL f2 =====  
 SFO2 400.1316005 MHz  
 NUC2 1H  
 CPDPRG2 waltz16  
 PCPD2 90.00 usec  
 PLW2 15.0000000 W  
 PLW12 0.34252000 W  
 PLW13 0.27744001 W

F2 - Processing parameters  
 SI 32768  
 SF 100.6127492 MHz  
 WDW EM  
 SSB 0  
 LB 2.00 Hz  
 GB 0  
 PC 1.00

<sup>1</sup>H NMR spectra of 3-hydroxy-2-(3-methoxypropyl)-3-phenylisoindolin-1-one (**3ga**)

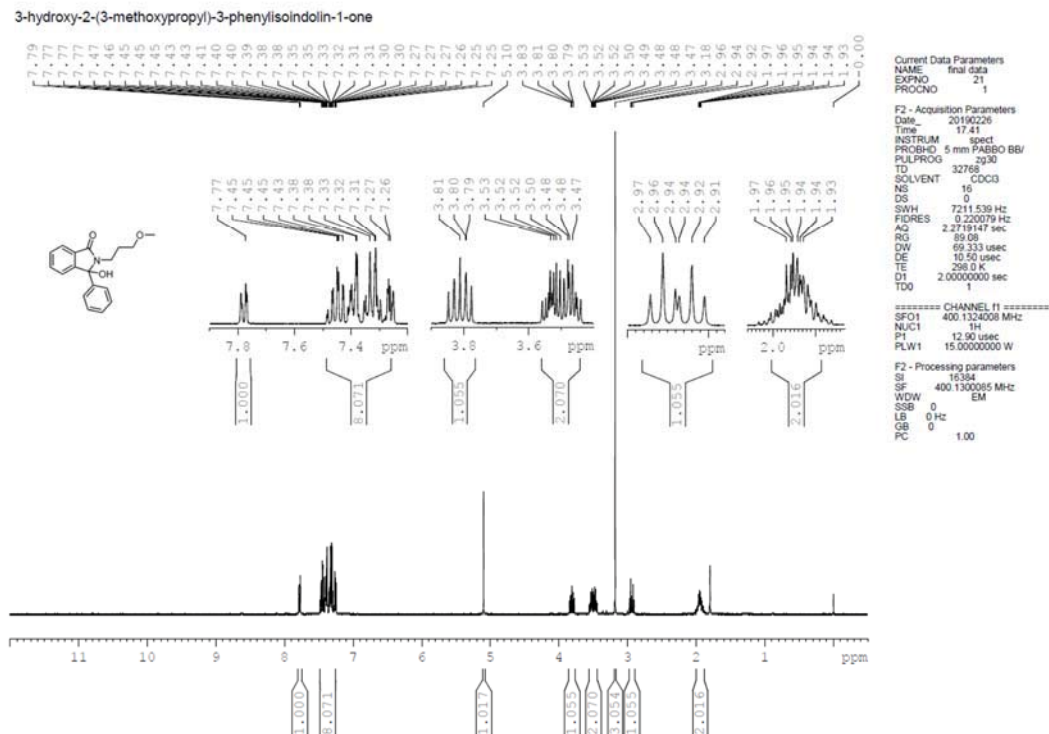

<sup>13</sup>C NMR spectra of 3-hydroxy-2-(3-methoxypropyl)-3-phenylisoindolin-1-one (**3ga**)

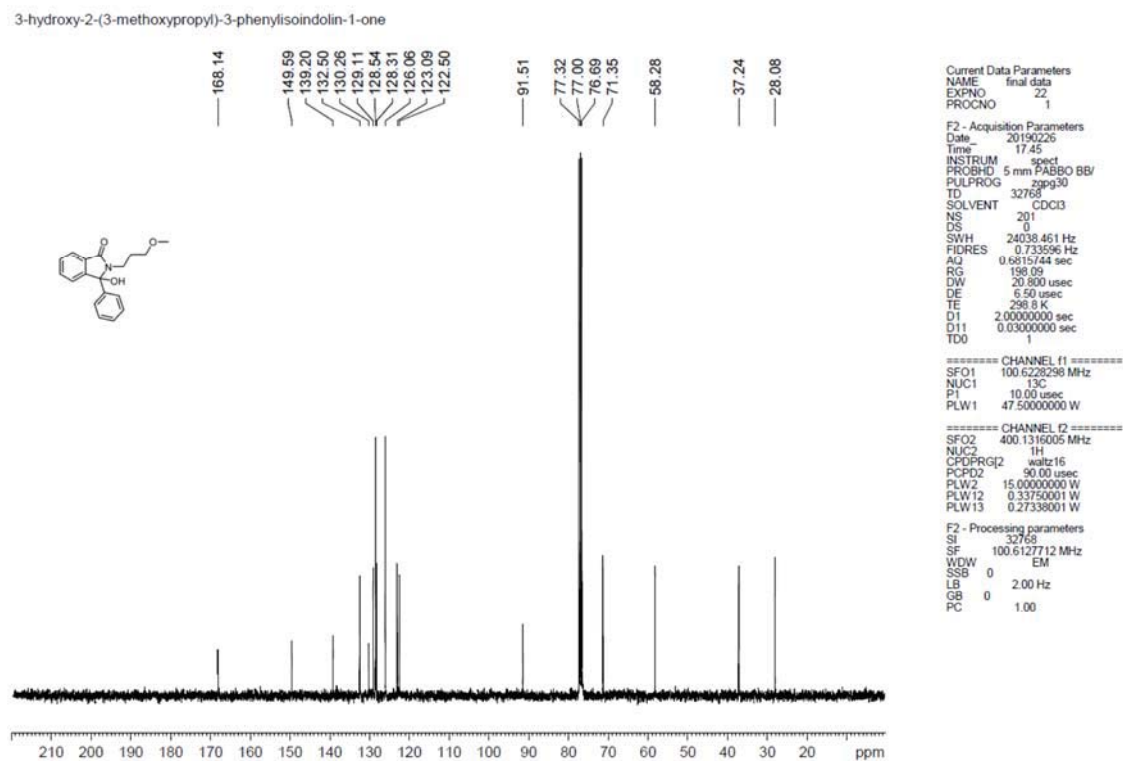



<sup>1</sup>H NMR spectra of 3-hydroxy-2-(2-morpholinoethyl)-3-phenylisoindolin-1-one (**3ha**)

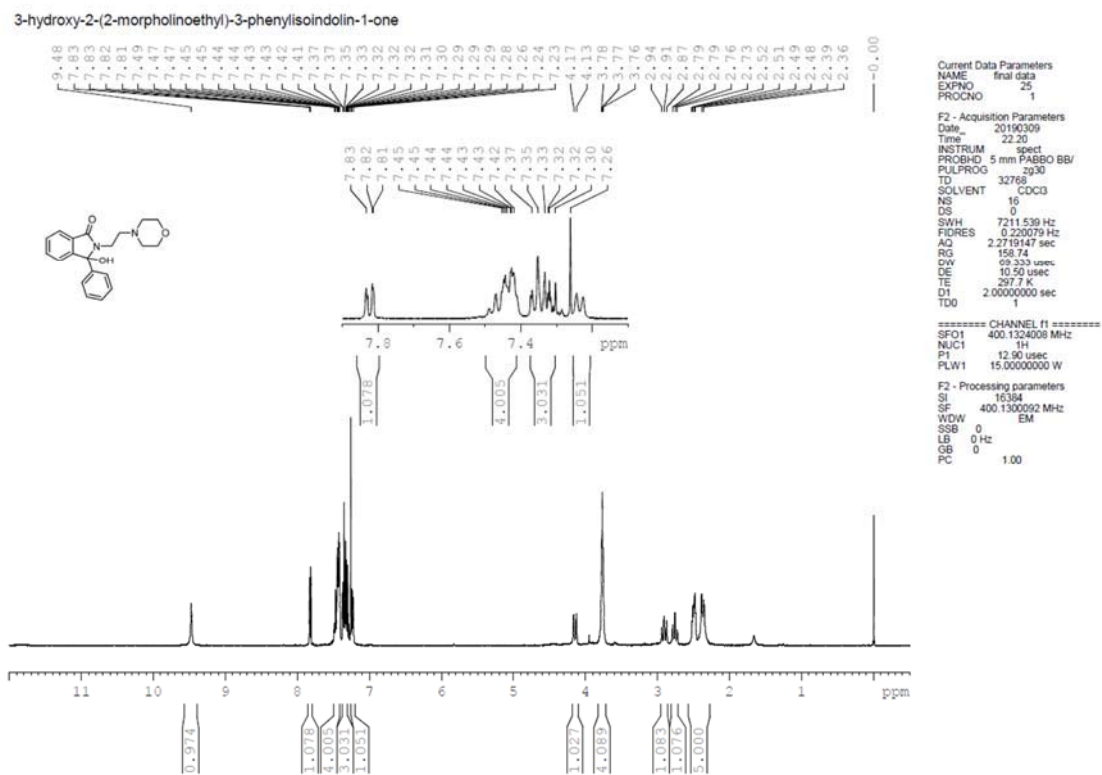

<sup>13</sup>C NMR spectra of 3-hydroxy-2-(2-morpholinoethyl)-3-phenylisoindolin-1-one (**3ha**)

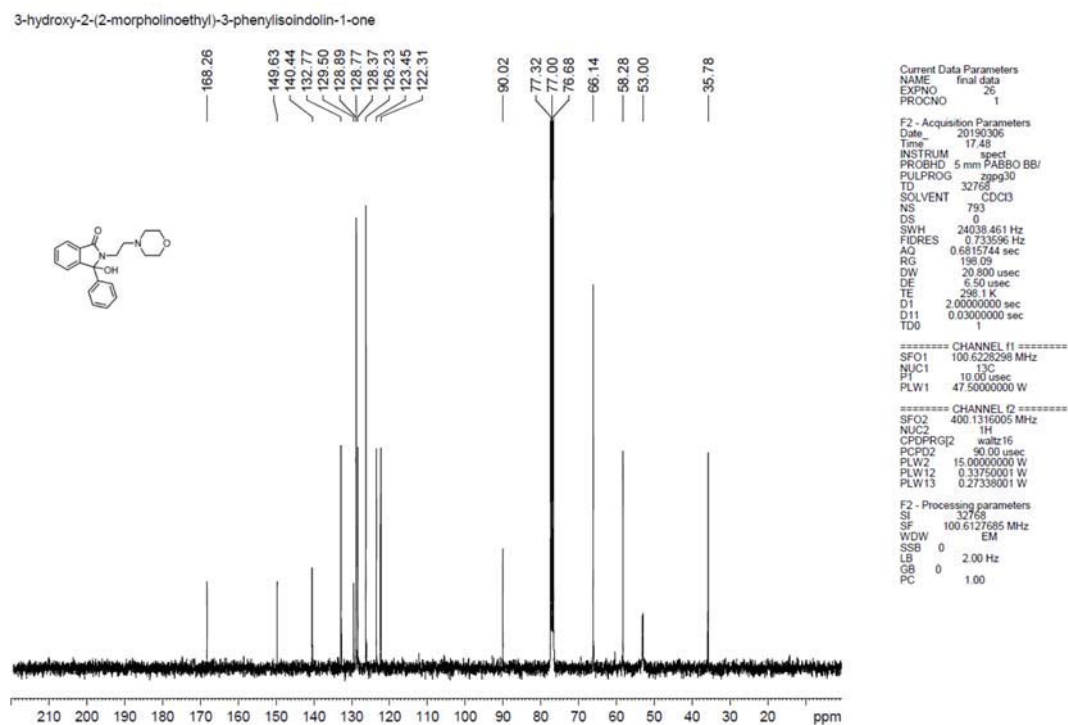

# 2-(2-(1H-Indol-3-yl)ethyl)-3-hydroxy-3-phenylisoindolin-1-one (3ia)

2-(2-(1H-indol-3-yl)ethyl)-3-hydroxy-3-phenylisoindolin-1-one

<sup>1</sup>H of N-c2h4indole final

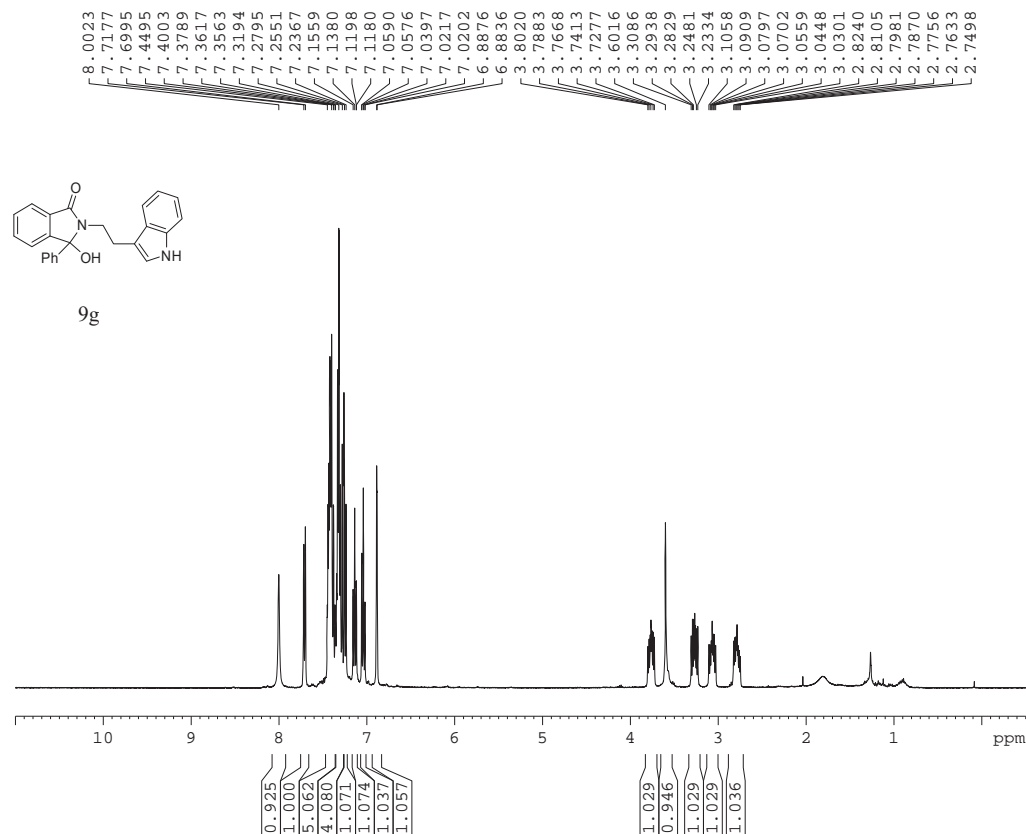

Current Data Parameters  
 NAME 20140412  
 EXPNO 2  
 PROCNO 1

F2 - Acquisition Parameters  
 Date\_ 20140412  
 Time 18.48  
 INSTRUM spect  
 PROBHD 5 mm PABBO BB/  
 PULPROG zg30  
 TD 32768  
 SOLVENT CDCl3  
 NS 16  
 DS 0  
 SWH 7211.539 Hz  
 FIDRES 0.220079 Hz  
 AQ 2.2719147 sec  
 RG 89.08  
 DW 69.333 usec  
 DE 10.52 usec  
 TE 298.3 K  
 D1 2.0000000 sec  
 TDO 1

===== CHANNEL f1 =====  
 SFO1 400.1324008 MHz  
 NUC1 1H  
 P1 12.80 usec  
 PLW1 15.0000000 W

F2 - Processing parameters  
 SI 16384  
 SF 400.1300094 MHz  
 WDW EM  
 SSB 0  
 LB 0 Hz  
 GB 0  
 PC 1.00

# 2-(2-(1H-Indol-3-yl)ethyl)-3-hydroxy-3-phenylisoindolin-1-one (3ia)

2-(2-(1H-indol-3-yl)ethyl)-3-hydroxy-3-phenylisoindolin-1-one

<sup>13</sup>C of N-c2h4indole final product

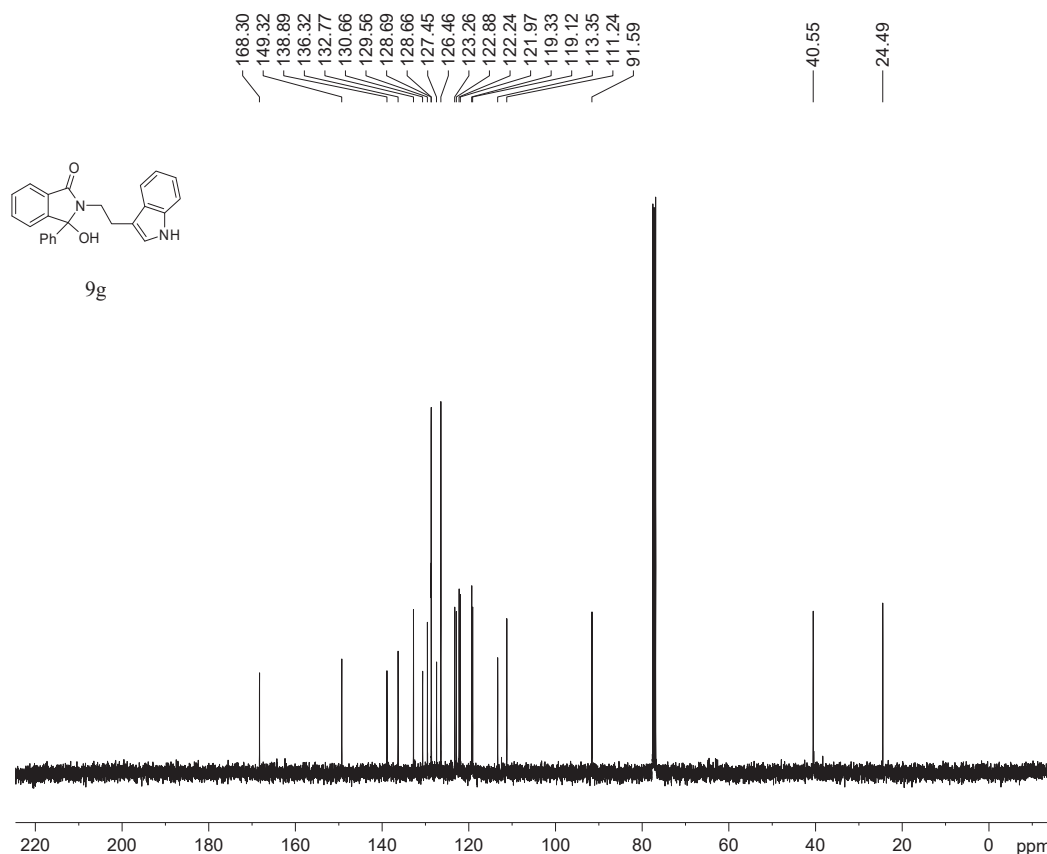

Current Data Parameters  
 NAME 20140412  
 EXPNO 2  
 PROCNO 1

F2 - Acquisition Parameters  
 Date\_ 20140412  
 Time 14.02  
 INSTRUM spect  
 PROBHD 5 mm BBO BB-1H  
 PULPROG zgpg30  
 TD 32768  
 SOLVENT CDCl3  
 NS 107  
 DS 0  
 SWH 24038.461 Hz  
 FIDRES 0.733596 Hz  
 AQ 0.6815744 sec  
 RG 2048  
 DW 20.800 usec  
 DE 6.50 usec  
 TE 300.4 K  
 D1 2.0000000 sec  
 D11 0.0300000 sec  
 TDO 1

===== CHANNEL f1 =====  
 NUC1 13C  
 P1 9.40 usec  
 PL1 7.00 dB  
 SFO1 100.6233325 MHz

===== CHANNEL f2 =====  
 CPDPRG2 waltz16  
 NUC2 1H  
 PCPD2 90.00 usec  
 PL2 -2.00 dB  
 PL12 13.95 dB  
 PL13 17.00 dB  
 SFO2 400.1316005 MHz

F2 - Processing parameters  
 SI 32768  
 SF 100.6127542 MHz  
 WDW EM  
 SSB 0  
 LB 1.00 Hz  
 GB 0  
 PC 1.00

<sup>1</sup>H NMR spectra of 2-Benzyl-6-bromo-3-hydroxy-3-phenylisoindolin-1-one (**3ja**)

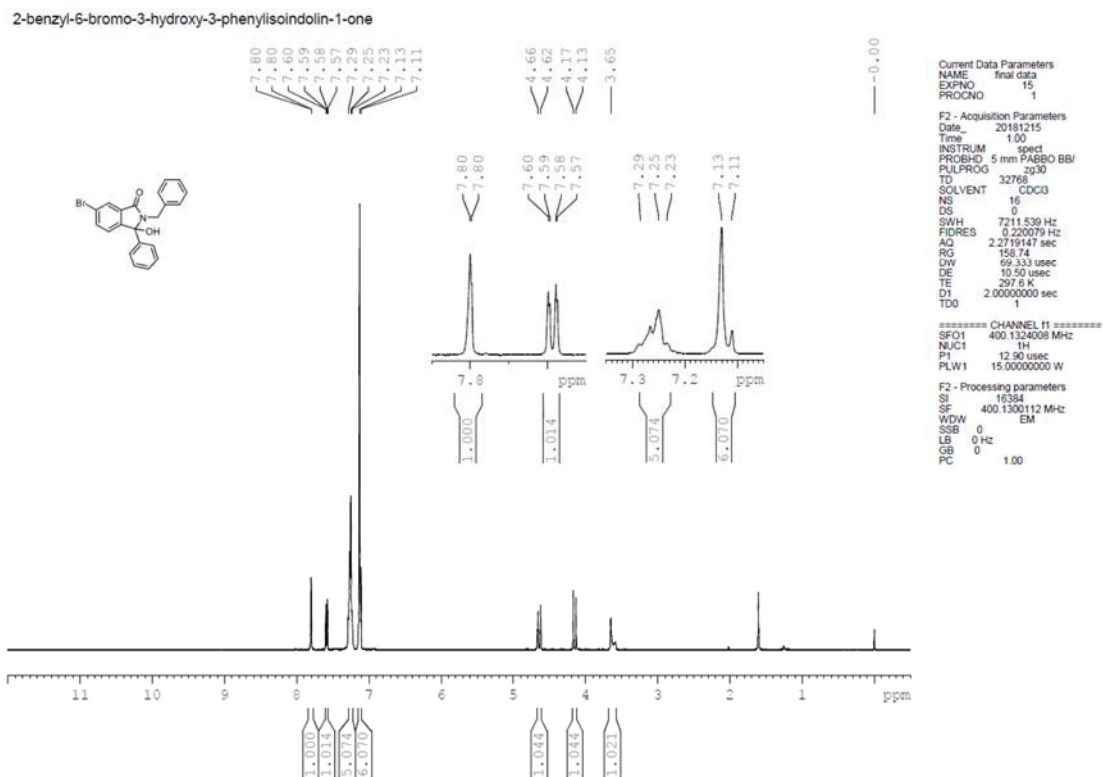

<sup>13</sup>C NMR spectra of 2-Benzyl-6-bromo-3-hydroxy-3-phenylisoindolin-1-one (**3ja**)

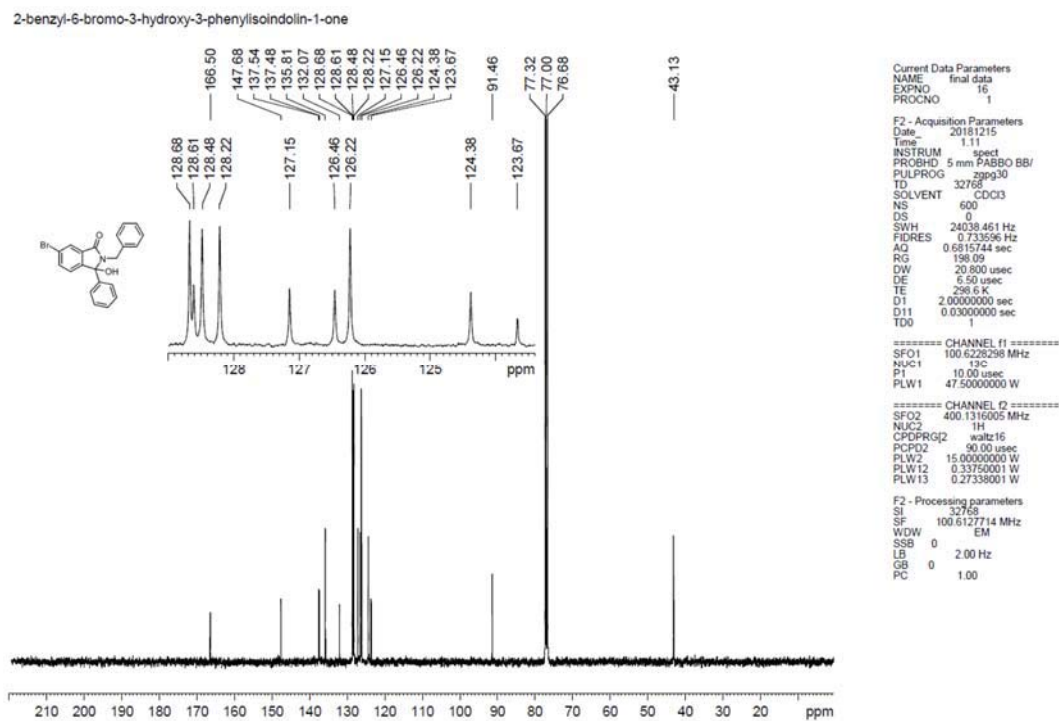



<sup>1</sup>H NMR spectra of 2-Benzyl-6-fluoro-3-hydroxy-3-phenylisoindolin-1-one (**31a**)

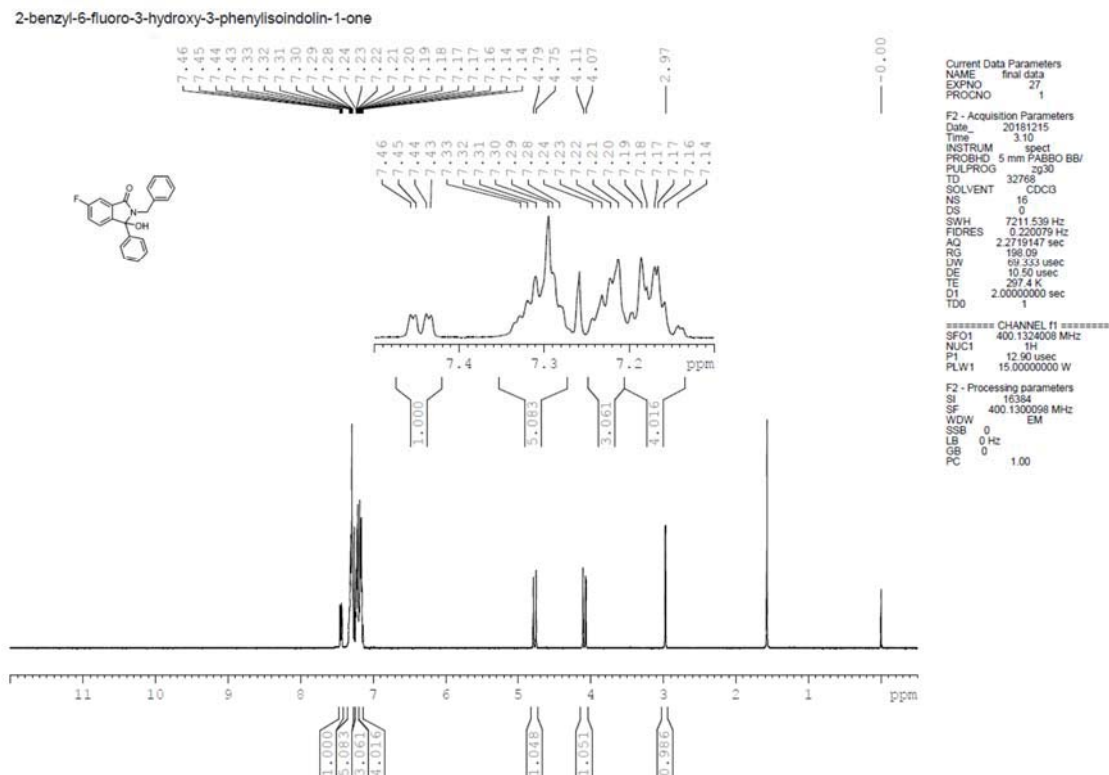

<sup>13</sup>C NMR spectra of 2-Benzyl-6-fluoro-3-hydroxy-3-phenylisoindolin-1-one (**31a**)

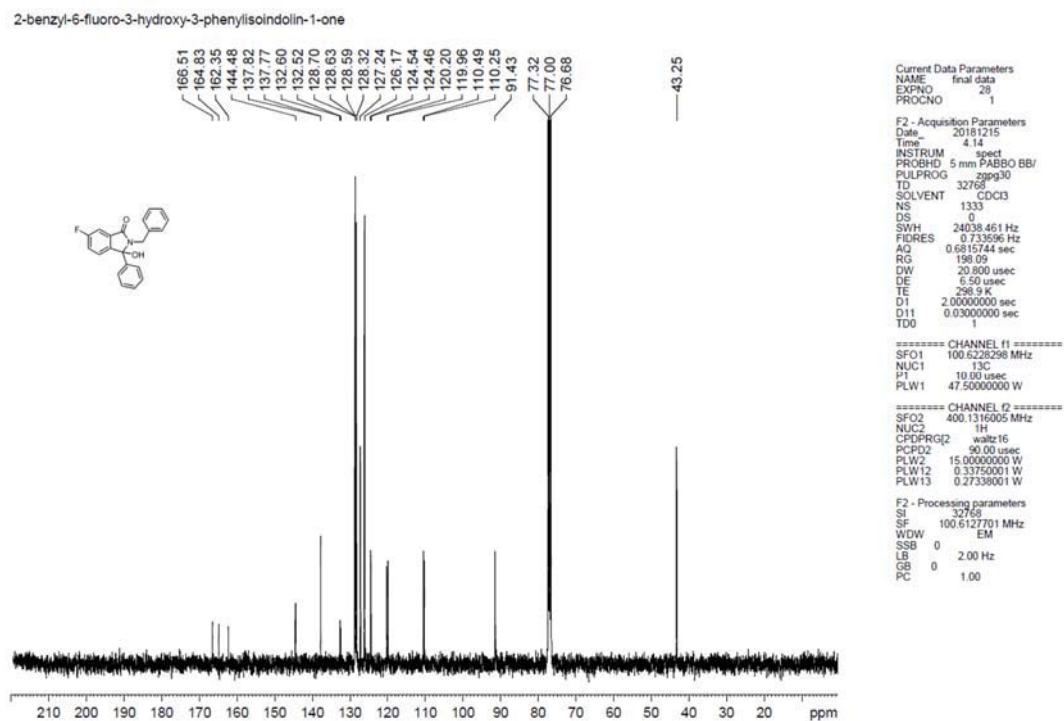

**3-Hydroxy-6-methoxy-2-methyl-3-phenylisoindolin-1-one (3ma):**

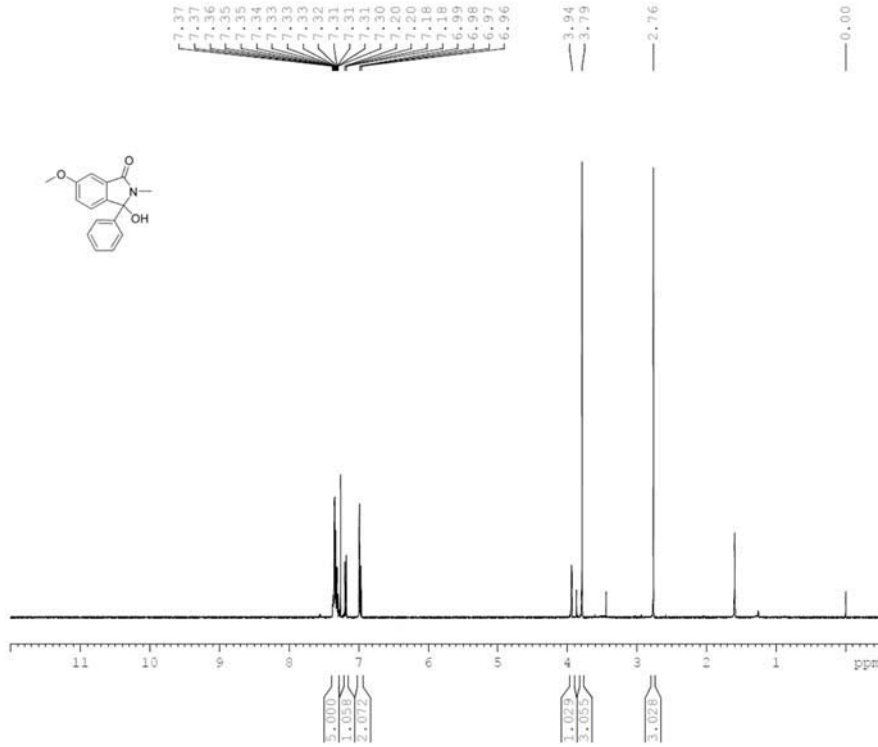

**3-Hydroxy-6-methoxy-2-methyl-3-phenylisoindolin-1-one (3ma):**

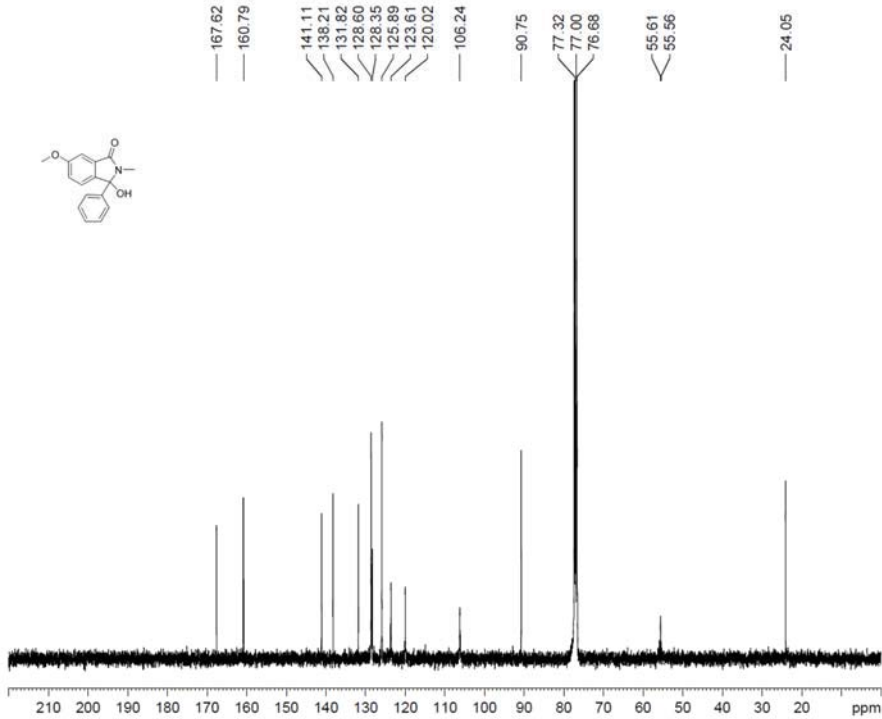

<sup>1</sup>H NMR spectra of 6-Benzyl-7-hydroxy-7-phenyl-6,7-dihydro-5H-[1,3]dioxolo[4,5-f]isoindol-5-one (**3na**)

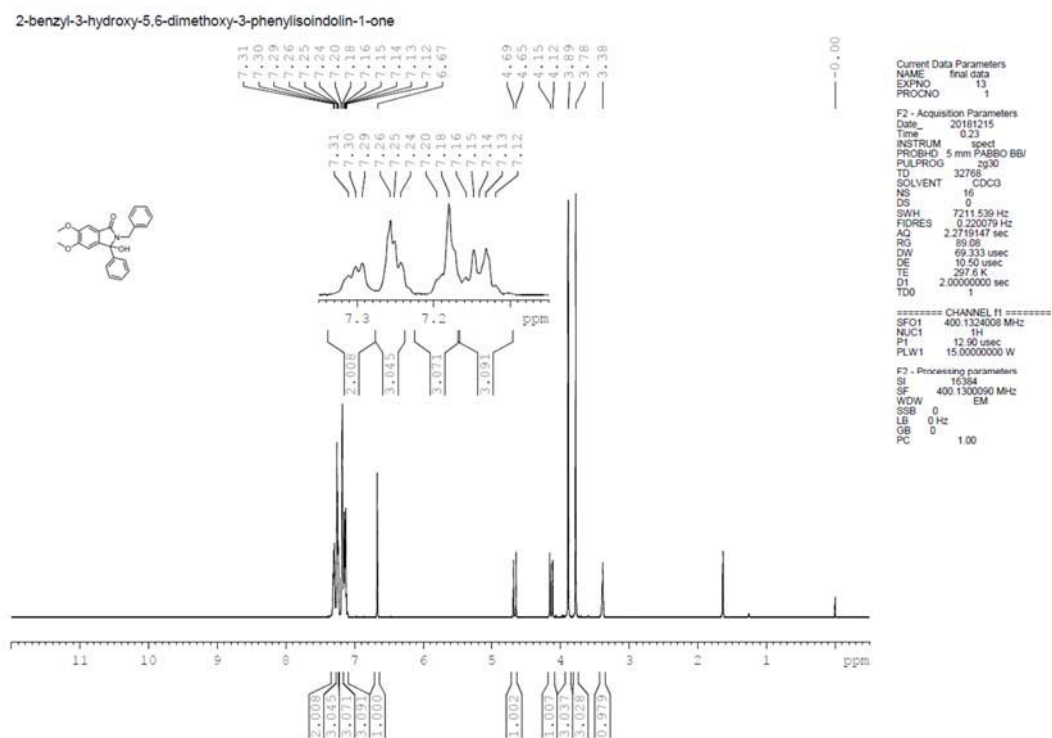

<sup>13</sup>C NMR spectra of 6-Benzyl-7-hydroxy-7-phenyl-6,7-dihydro-5H-[1,3]dioxolo[4,5-f]isoindol-5-one (**3na**)

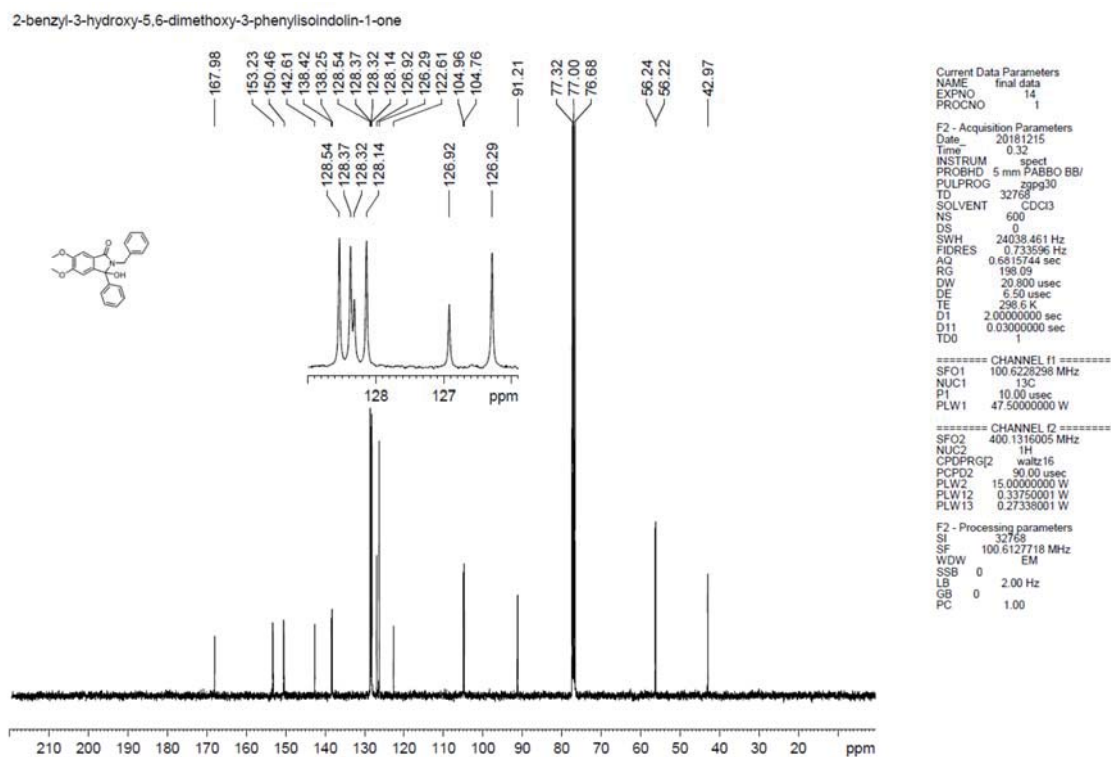

**7-Hydroxy-6-methyl-7-phenyl-6,7-dihydro-5H-[1,3]dioxolo[4,5-f]isoindol-5-one (30a):**

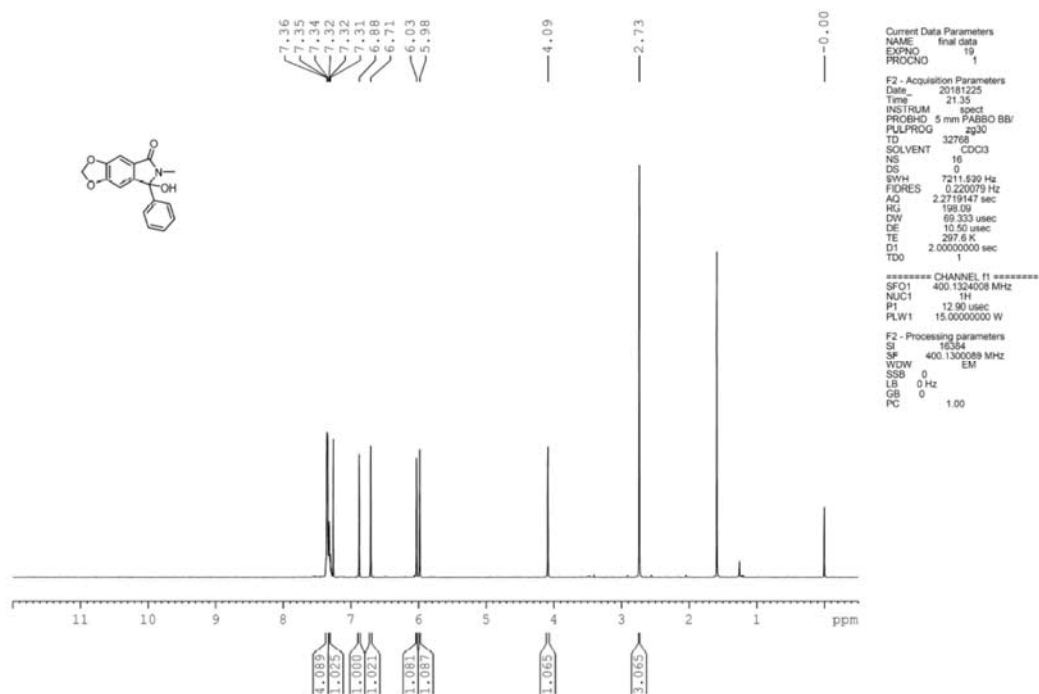

**7-Hydroxy-6-methyl-7-phenyl-6,7-dihydro-5H-[1,3]dioxolo[4,5-f]isoindol-5-one (30a):**

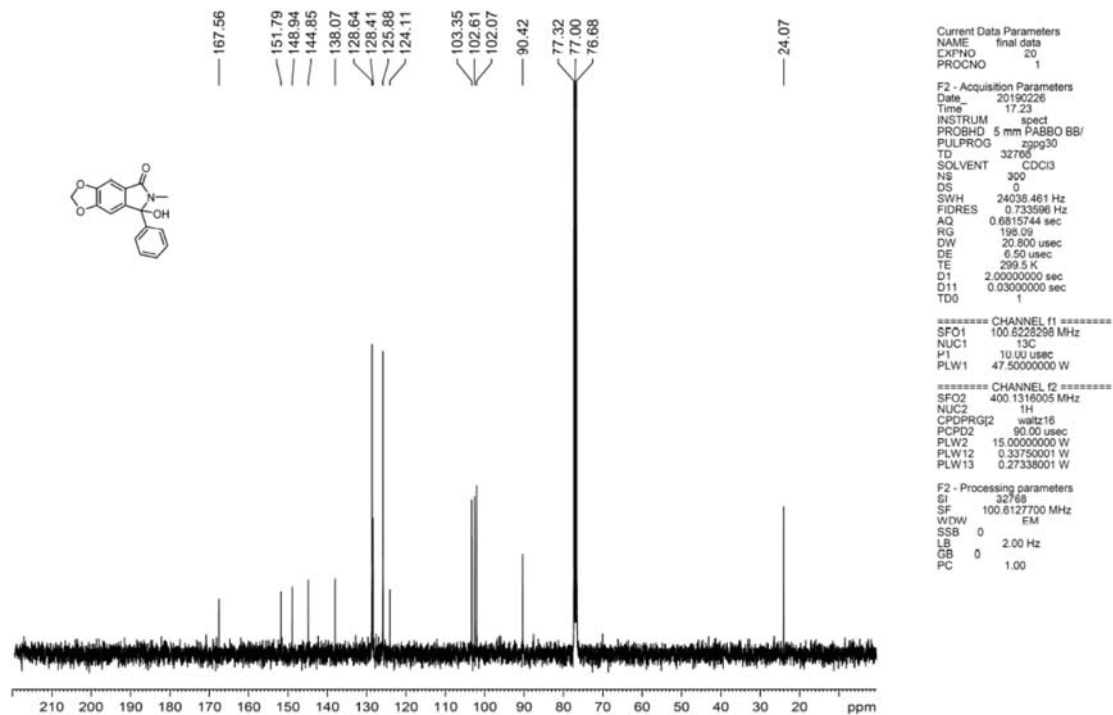



<sup>1</sup>H NMR spectra of 3-(2-bromophenyl)-3-hydroxy-2-phenylisoindolin-1-one (3an)

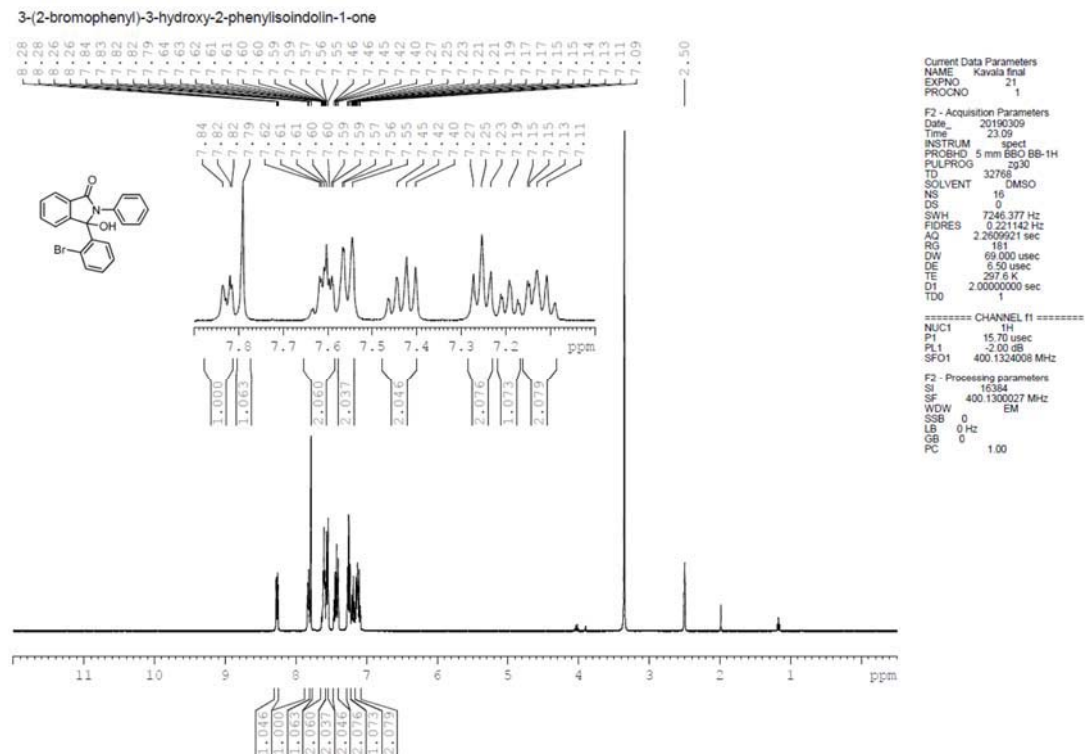

<sup>13</sup>C NMR spectra of 3-(2-bromophenyl)-3-hydroxy-2-phenylisoindolin-1-one (3an)

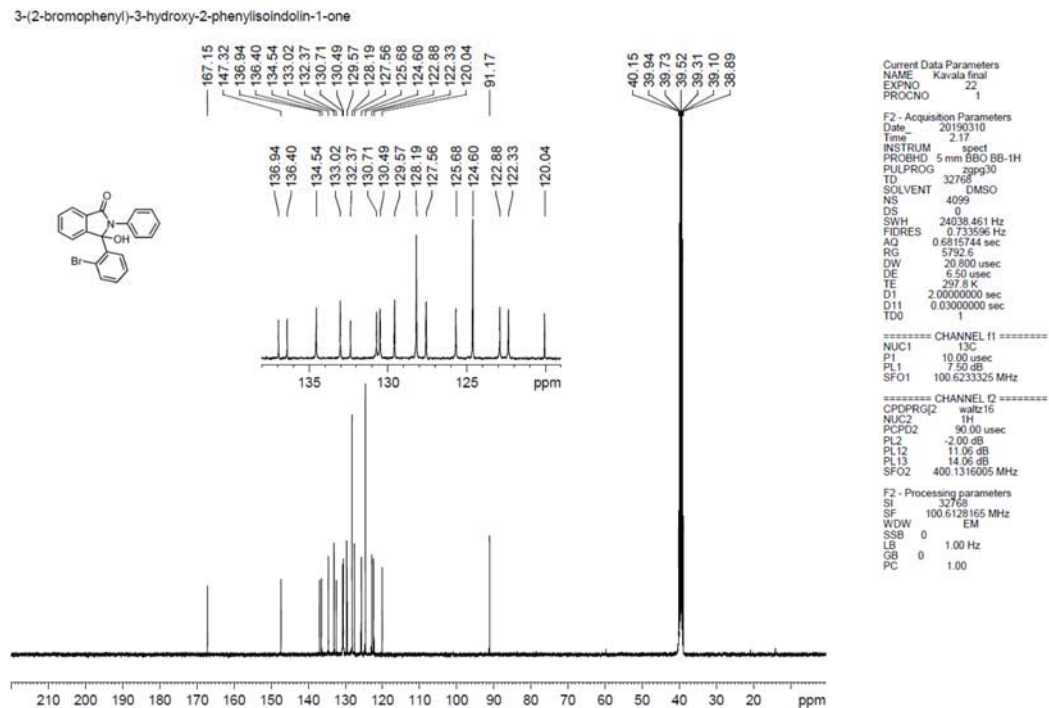

<sup>1</sup>H NMR spectra of 2-Benzyl-3-(2-bromophenyl)-3-hydroxyisoindolin-1-one (3en)

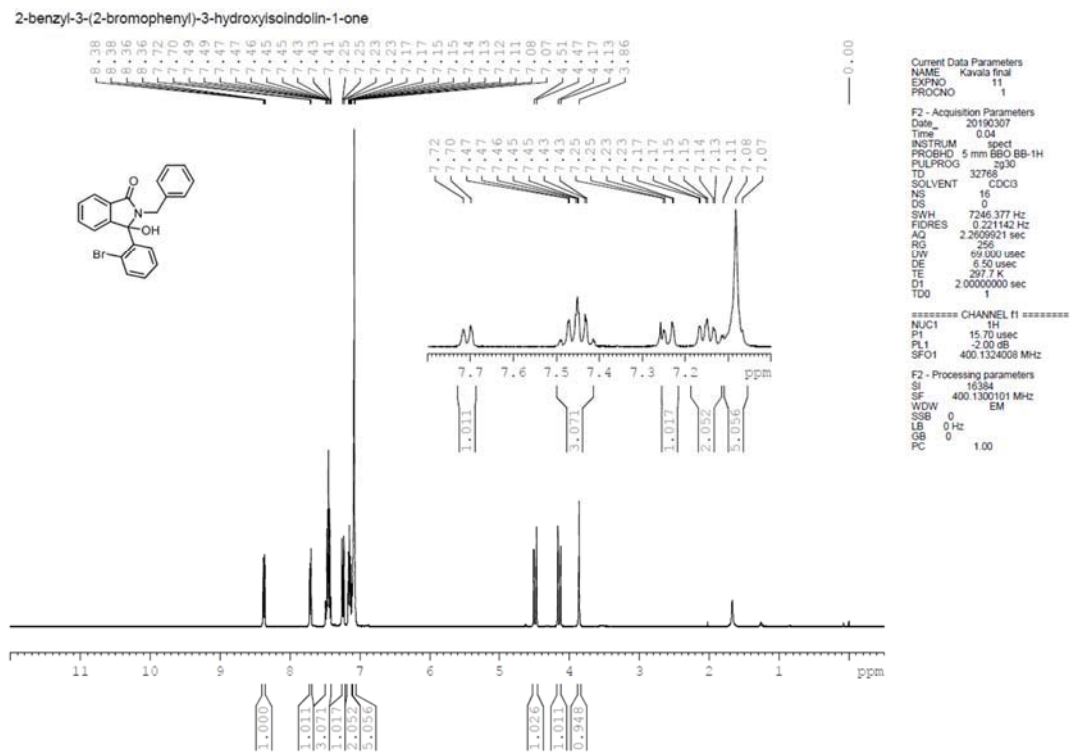

<sup>13</sup>C NMR spectra of 2-Benzyl-3-(2-bromophenyl)-3-hydroxyisoindolin-1-one (3en)

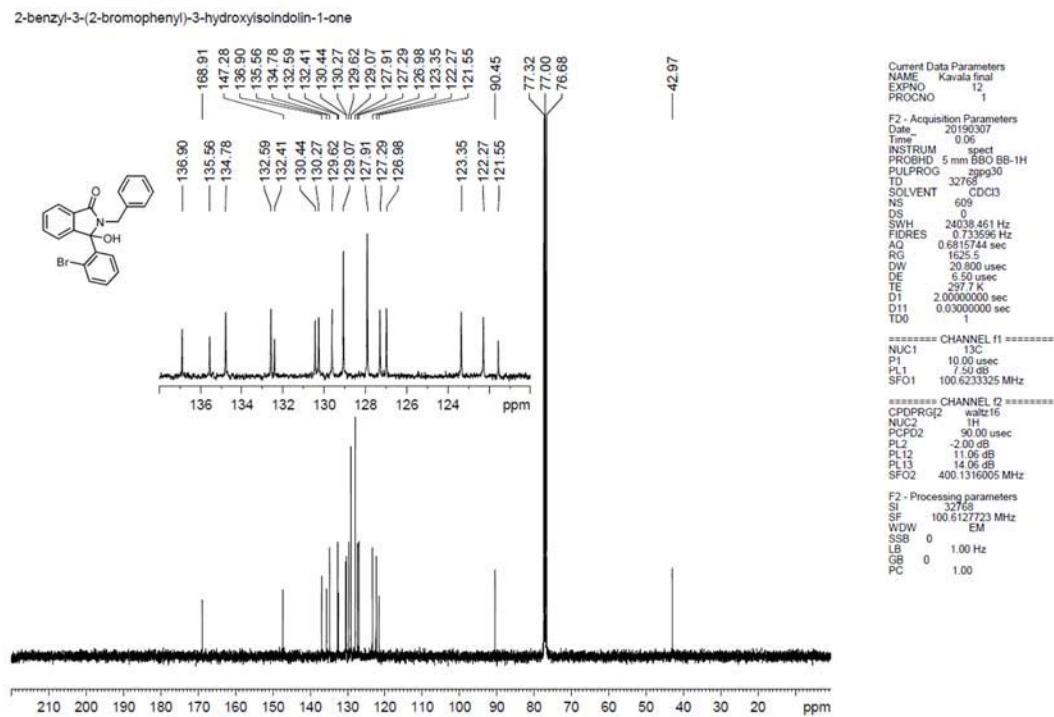

<sup>1</sup>H NMR spectra of 3-(2-bromophenyl)-3-hydroxy-2-phenethylisoindolin-1-one (**3fn**)

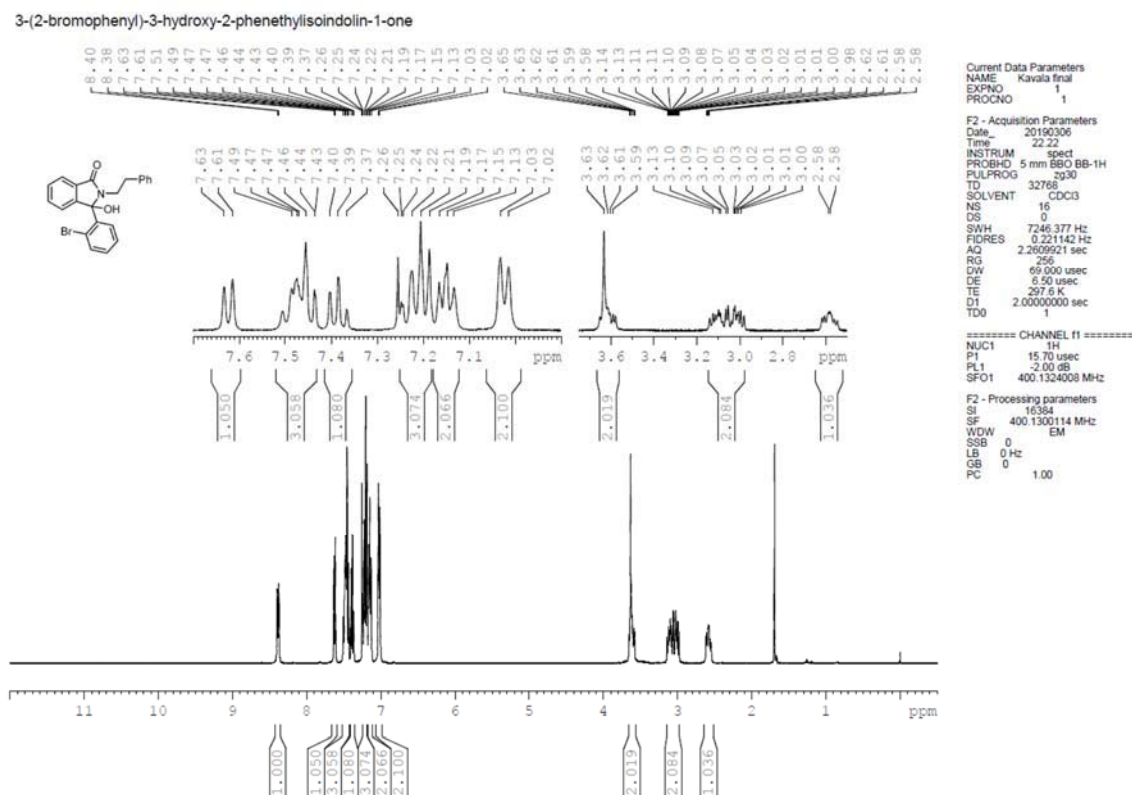

<sup>13</sup>C NMR spectra of 3-(2-bromophenyl)-3-hydroxy-2-phenethylisoindolin-1-one (**3fn**)

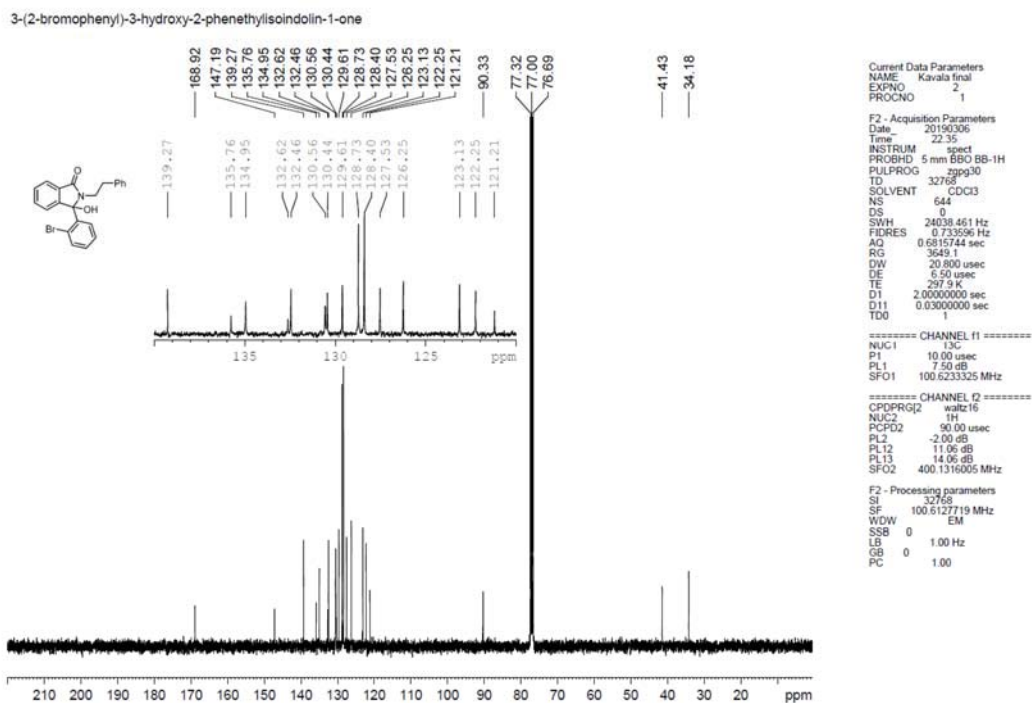

<sup>1</sup>H NMR spectra of 2-benzyl-6-bromo-3-(2-bromophenyl)-3-hydroxyisoindolin-1-one (**3kn**)

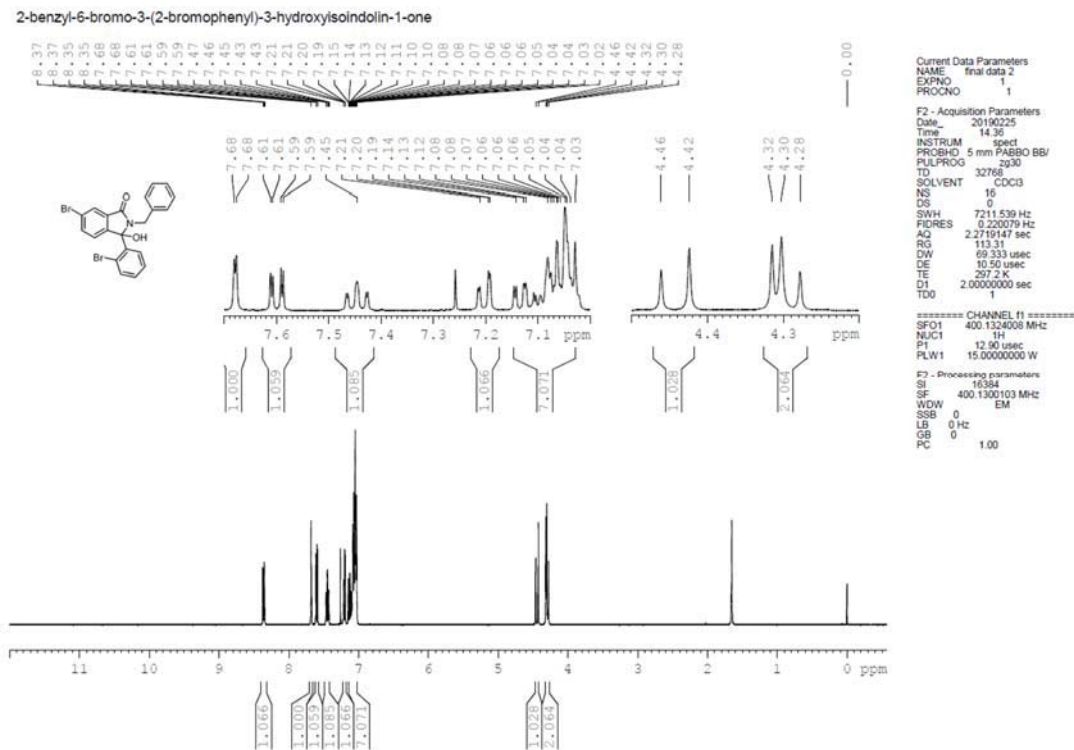

<sup>13</sup>C NMR spectra of 2-benzyl-6-bromo-3-(2-bromophenyl)-3-hydroxyisoindolin-1-one (**3kn**)

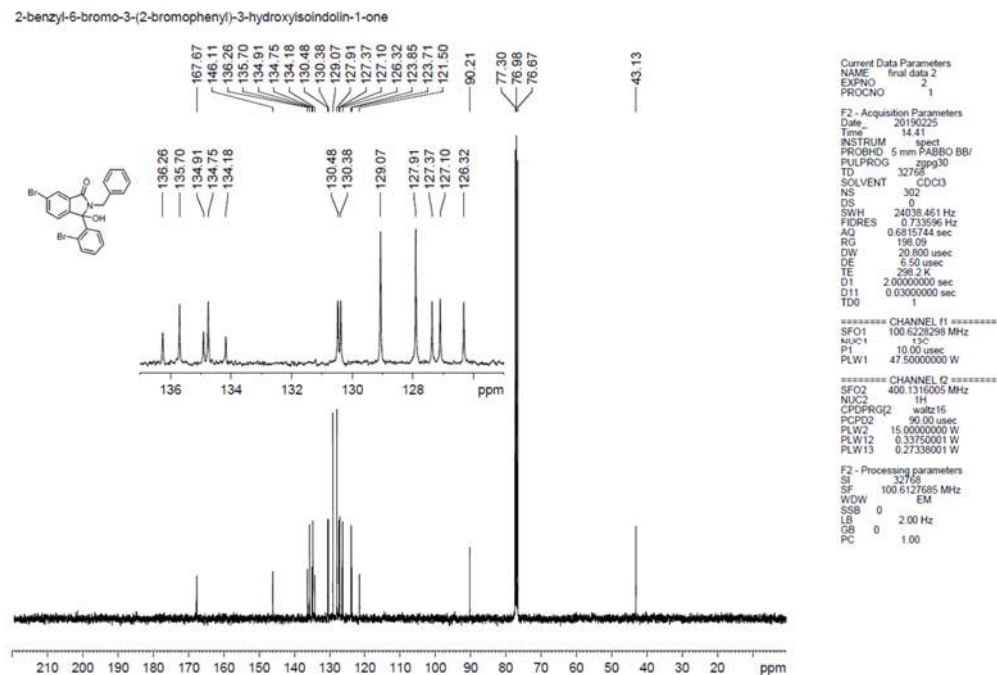



<sup>1</sup>H NMR spectra of 3-(2-bromophenyl)-5-chloro-3-hydroxy-2-phenylisoindolin-1-one (3mn)

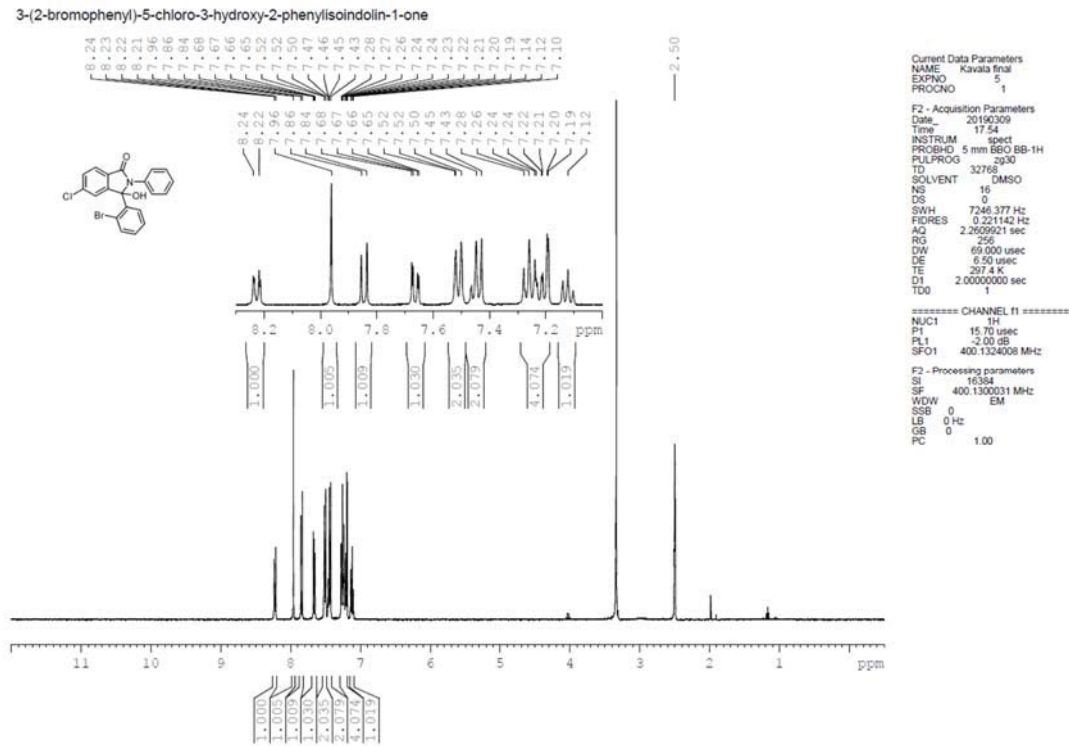

<sup>13</sup>C NMR spectra of 3-(2-bromophenyl)-5-chloro-3-hydroxy-2-phenylisoindolin-1-one (3mn)

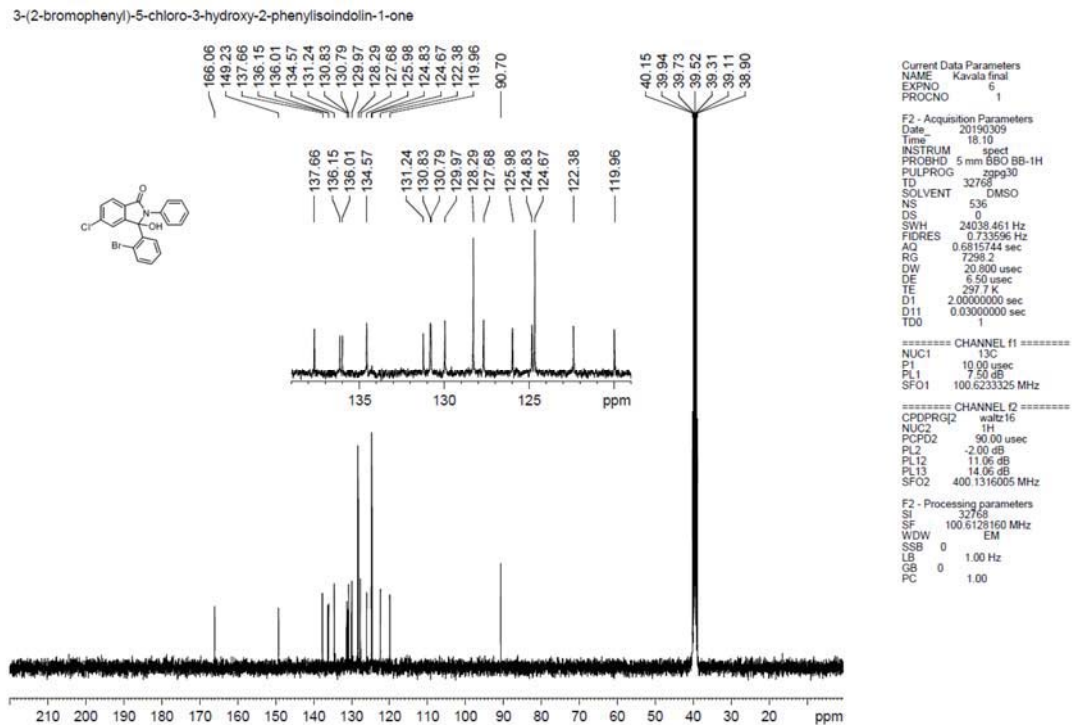

**<sup>1</sup>H NMR of 2-Benzyl-3-(2-bromophenyl)-3-hydroxy-6-methoxyisindolin-1-one (3nn)**

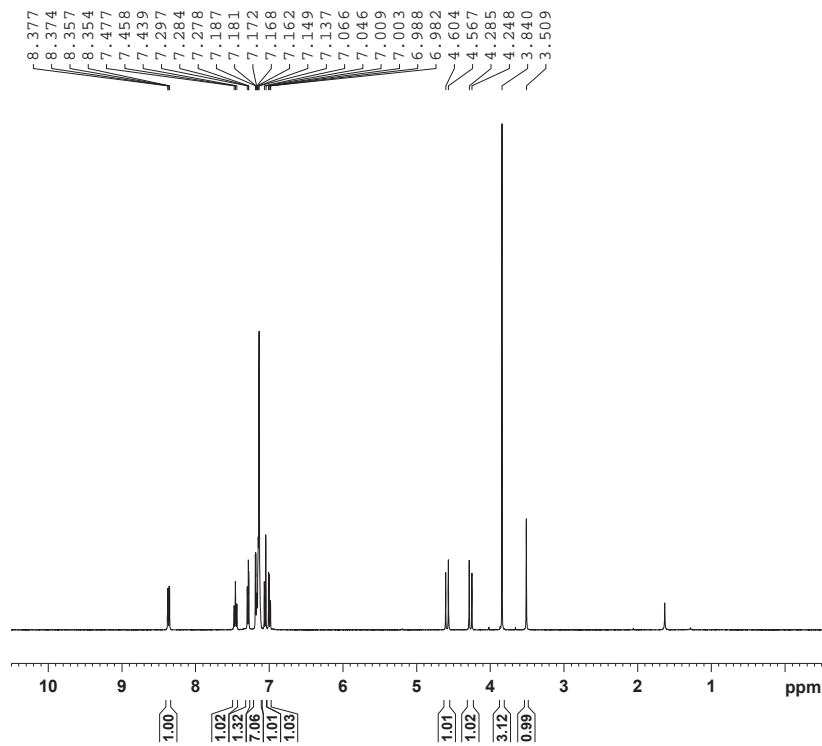

```

Current Data Parameters
NAME      PBP-Dr Kavala
EXPNO    30
PROCNO   1

F2 - Acquisition Parameters
Date_    20190716
Time     16.53
INSTRUM  spect
PROBHD   5 mm PABBO BB/
PULPROG  zg30
TD       32768
SOLVENT  CDCl3
NS       16
DS       0
SWH      7211.539 Hz
FIDRES   0.220079 Hz
AQ       2.2719646 sec
RG       177.16
DW       69.333 usec
DE       10.06 usec
TE       297.7 K
D1       2.0000000 sec
TD0      1

===== CHANNEL f1 =====
SF01    400.1324008 MHz
NUC1     1H
P1       15.00 usec
PLW1    11.39999962 W

F2 - Processing parameters
SI       16384
SF       400.1300000 MHz
WDW      EM
SSB      0
LB       0 Hz
GB       0
PC       1.00
    
```

**<sup>13</sup>C NMR of 2-Benzyl-3-(2-bromophenyl)-3-hydroxy-6-methoxyisindolin-1-one (3nn)**

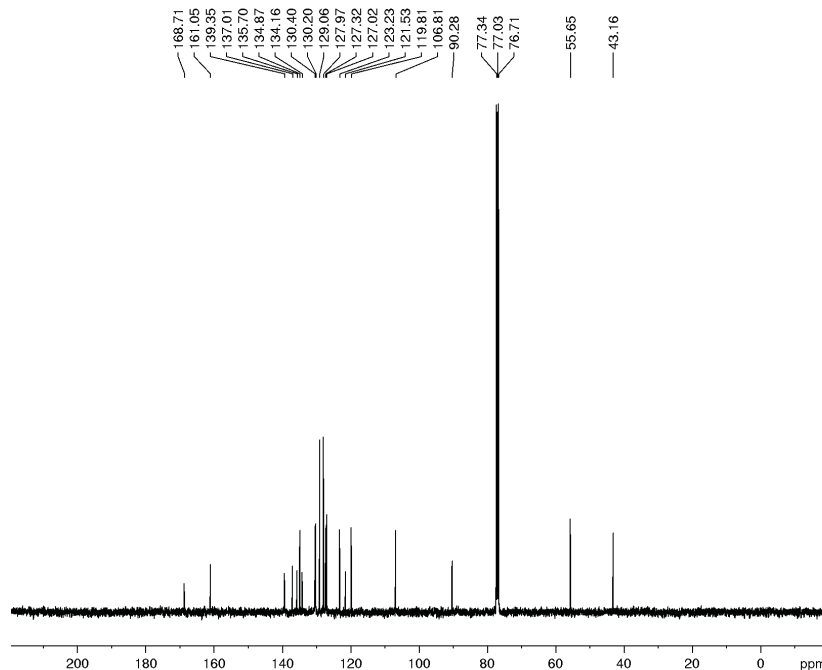

```

Current Data Parameters
NAME      PBP-Dr Kavala
EXPNO    31
PROCNO   1

F2 - Acquisition Parameters
Date_    20190716
Time     16.55
INSTRUM  spect
PROBHD   5 mm PABBO BB/
PULPROG  zgpg30
TD       32768
SOLVENT  CDCl3
NS       439
DS       0
SWH      24028.461 Hz
FIDRES   0.733596 Hz
AQ       0.6815744 sec
RG       198.09
DW       20.900 usec
DE       6.50 usec
TE       298.4 K
D1       2.0000000 sec
D11      0.03000000 sec
TD0      1

===== CHANNEL f1 =====
SF01    100.6223298 MHz
NUC1     13C
P1       10.00 usec
PLW1    49.50000000 W

===== CHANNEL f2 =====
SF02    400.1316005 MHz
NUC2     1H
CPDPRG2  waltz16
PCPD2    90.00 usec
PLW2    12.50000000 W
PLW12   0.34722000 W
PLW13   0.29125000 W

F2 - Processing parameters
SI       32768
SF       100.6127695 MHz
WDW      EM
SSB      0
LB       2.00 Hz
GB       0
PC       1.00
    
```

<sup>1</sup>H NMR spectra of 6-benzyl-7-(2-bromophenyl)-7-hydroxy-6,7-dihydro-5H-[1,3]dioxolo[4,5-f]isoindol-5-one (**3pn**)

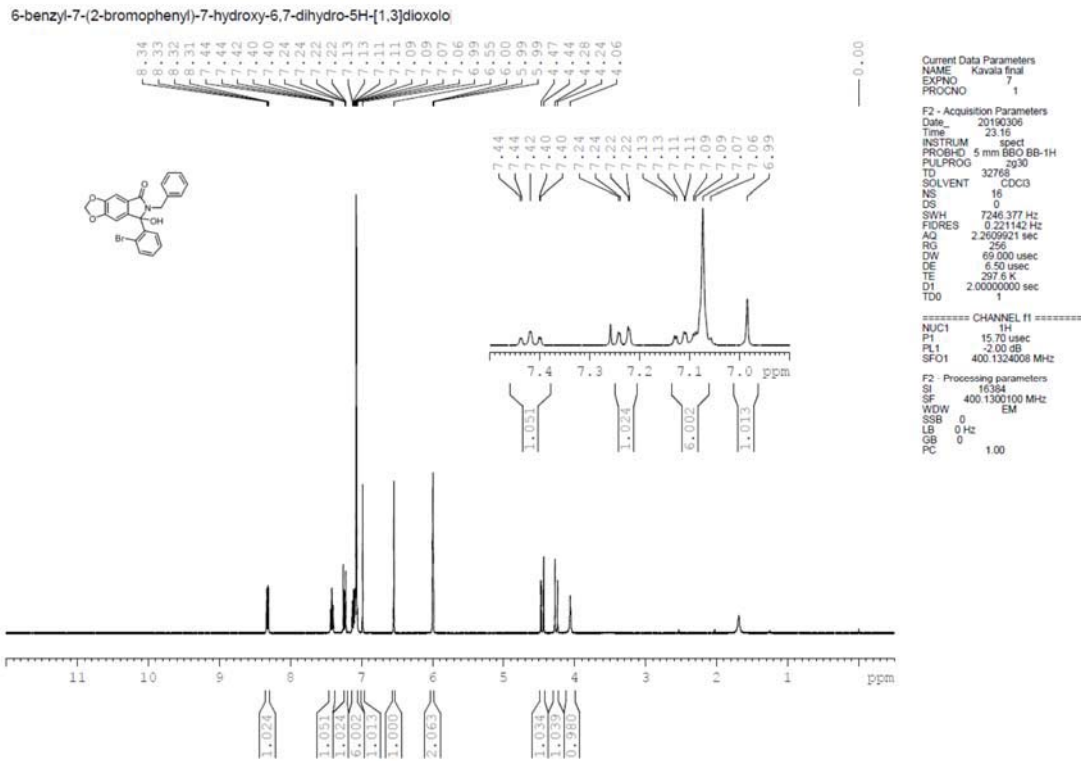

<sup>13</sup>C NMR spectra of 6-benzyl-7-(2-bromophenyl)-7-hydroxy-6,7-dihydro-5H-[1,3]dioxolo[4,5-f]isoindol-5-one (**3pn**)

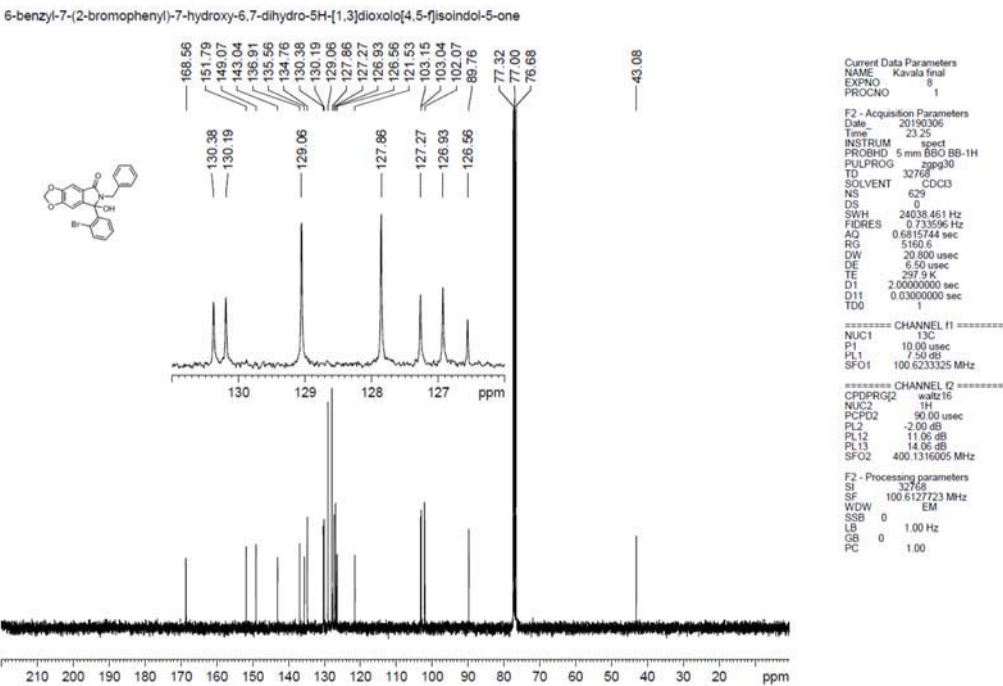



<sup>1</sup>H NMR spectra of 2-Benzyl-3-(2-bromo-5-methoxyphenyl)-3-hydroxyisoindolin-1-one (**3ao**)

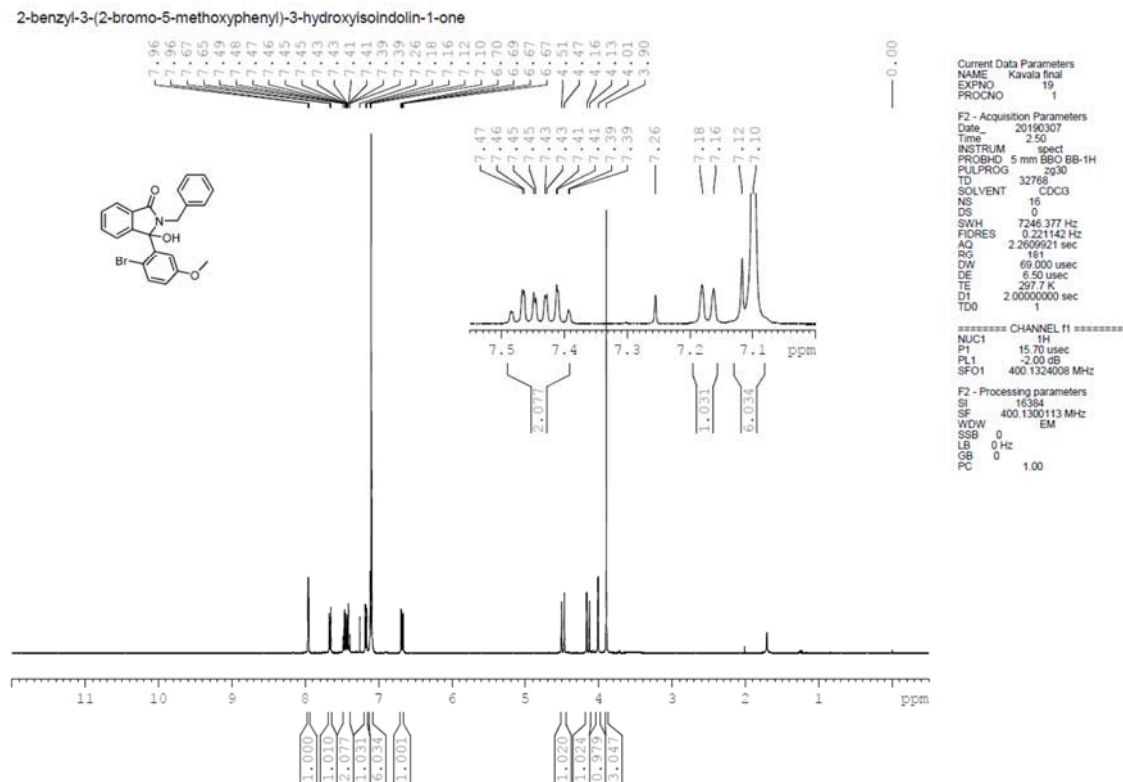

<sup>13</sup>C NMR spectra of 2-Benzyl-3-(2-bromo-5-methoxyphenyl)-3-hydroxyisoindolin-1-one (**3ao**)

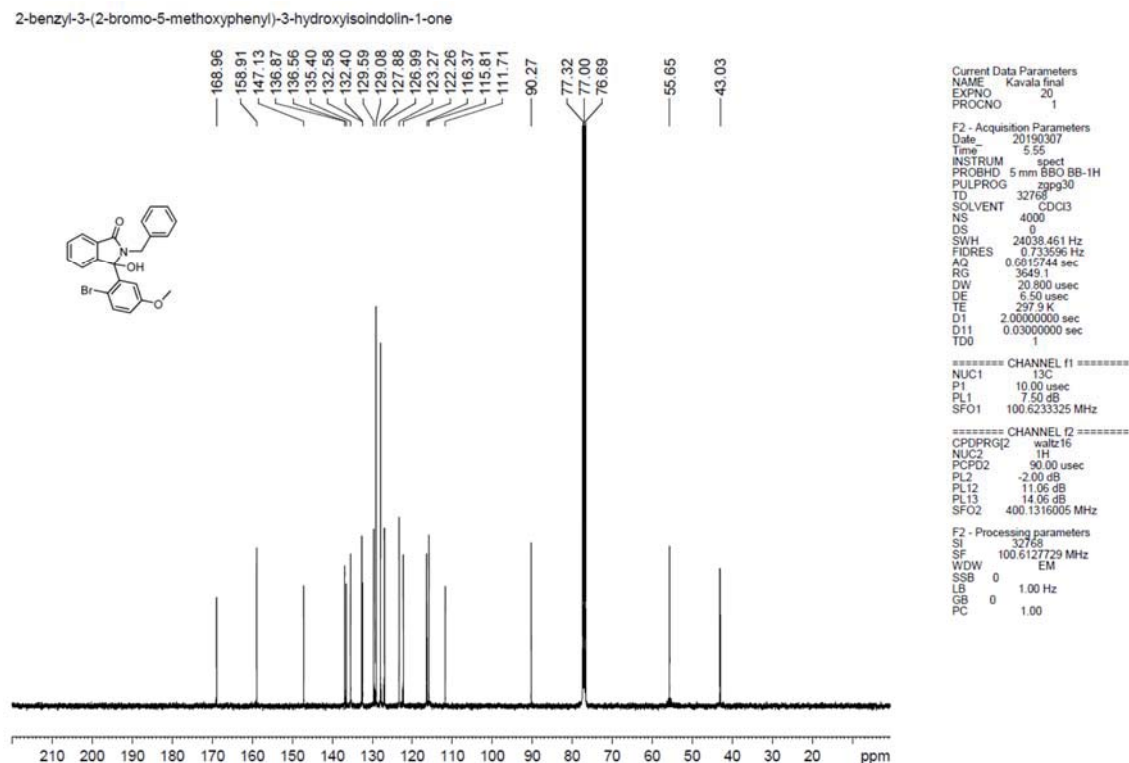

<sup>1</sup>H NMR spectra of 2-Benzyl-3-(2-bromo-4,5-dimethoxyphenyl)-3-hydroxyisoindolin-1-one (**3ap**)

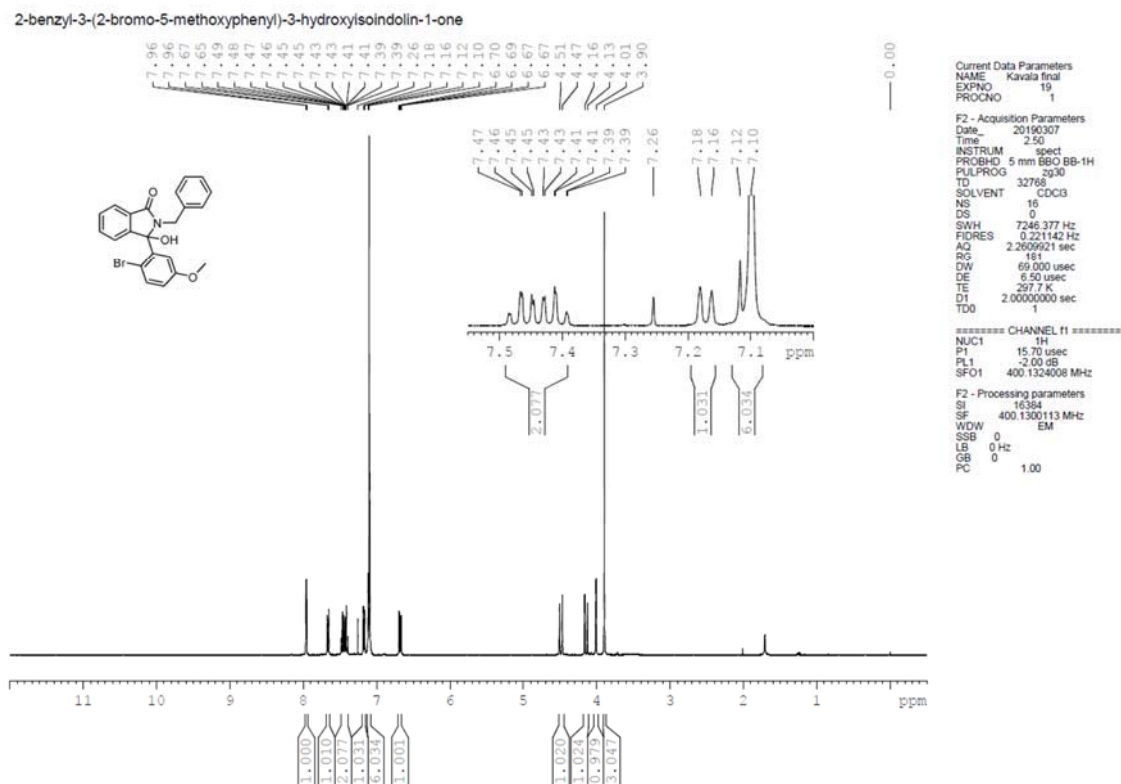

<sup>13</sup>C NMR spectra of 2-Benzyl-3-(2-bromo-4,5-dimethoxyphenyl)-3-hydroxyisoindolin-1-one (**3ap**)

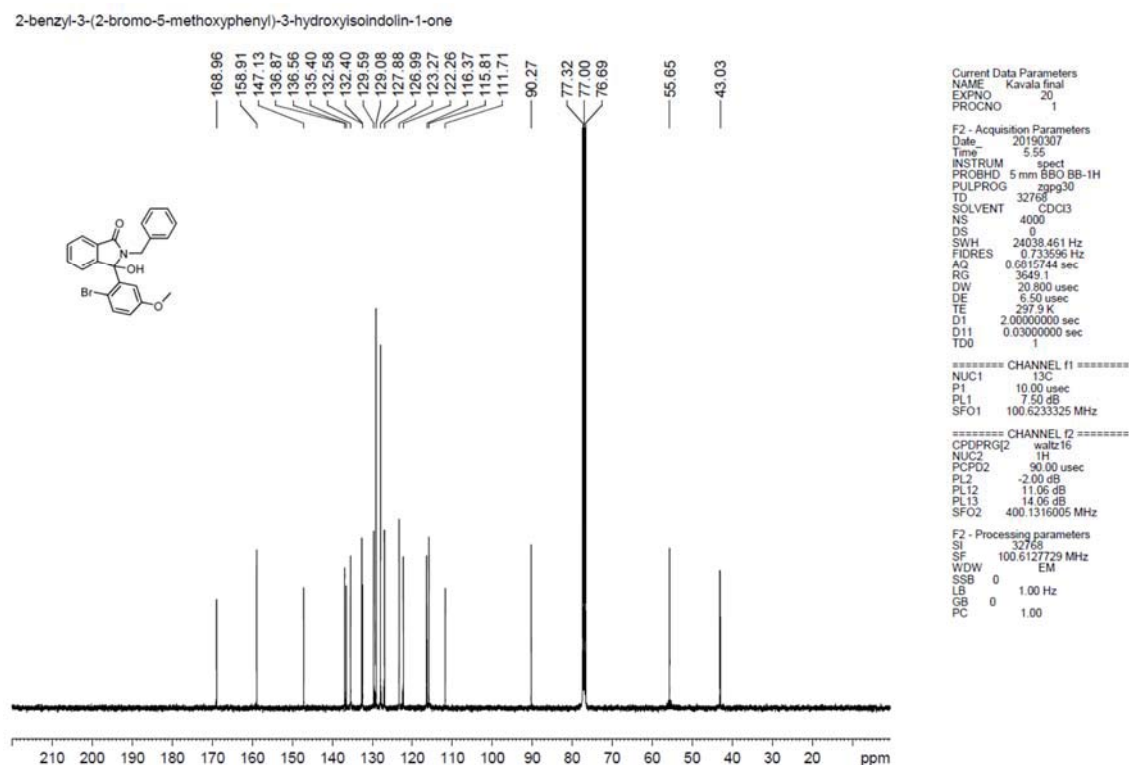

<sup>1</sup>H NMR spectra of 2-Benzyl-3-(6-bromobenzo[d][1,3]dioxol-5-yl)-3-hydroxyisoindolin-1-one (**3aq**)

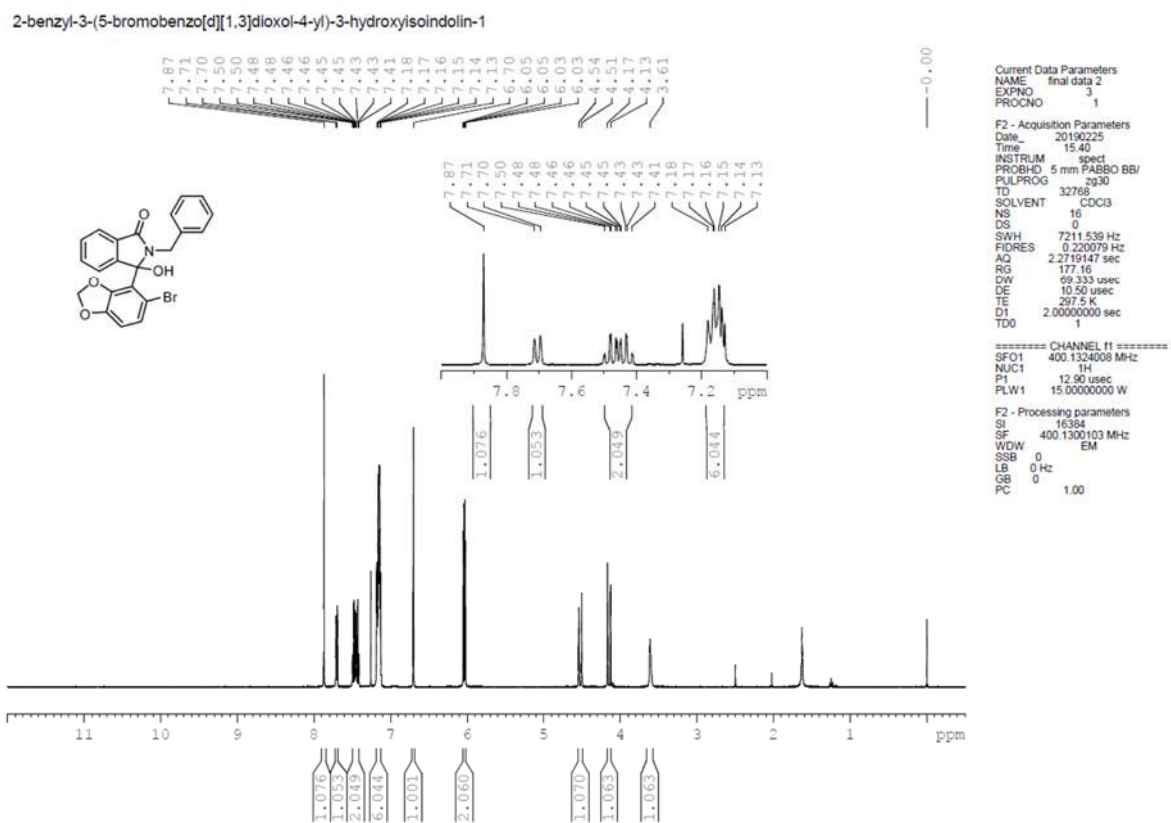

<sup>13</sup>C NMR spectra of 2-Benzyl-3-(6-bromobenzo[d][1,3]dioxol-5-yl)-3-hydroxyisoindolin-1-one (**3aq**)

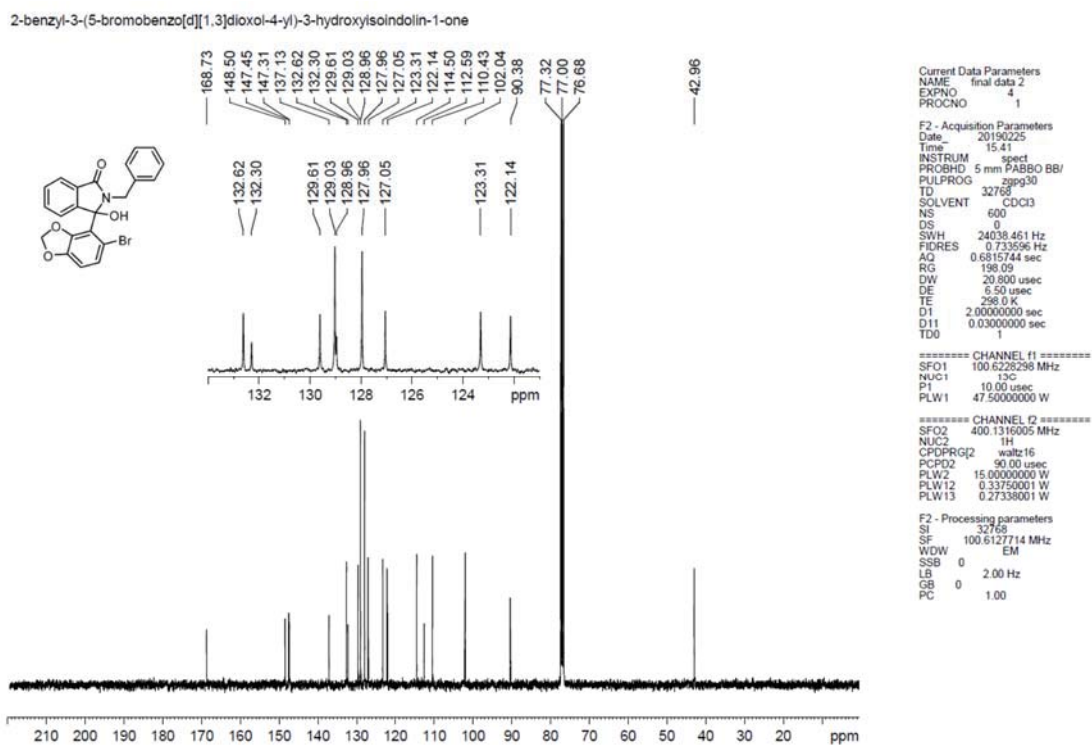

<sup>1</sup>H NMR spectra of 2-Benzyl-3-(2,5-dibromophenyl)-3-hydroxyisoindolin-1-one (**3ar**)

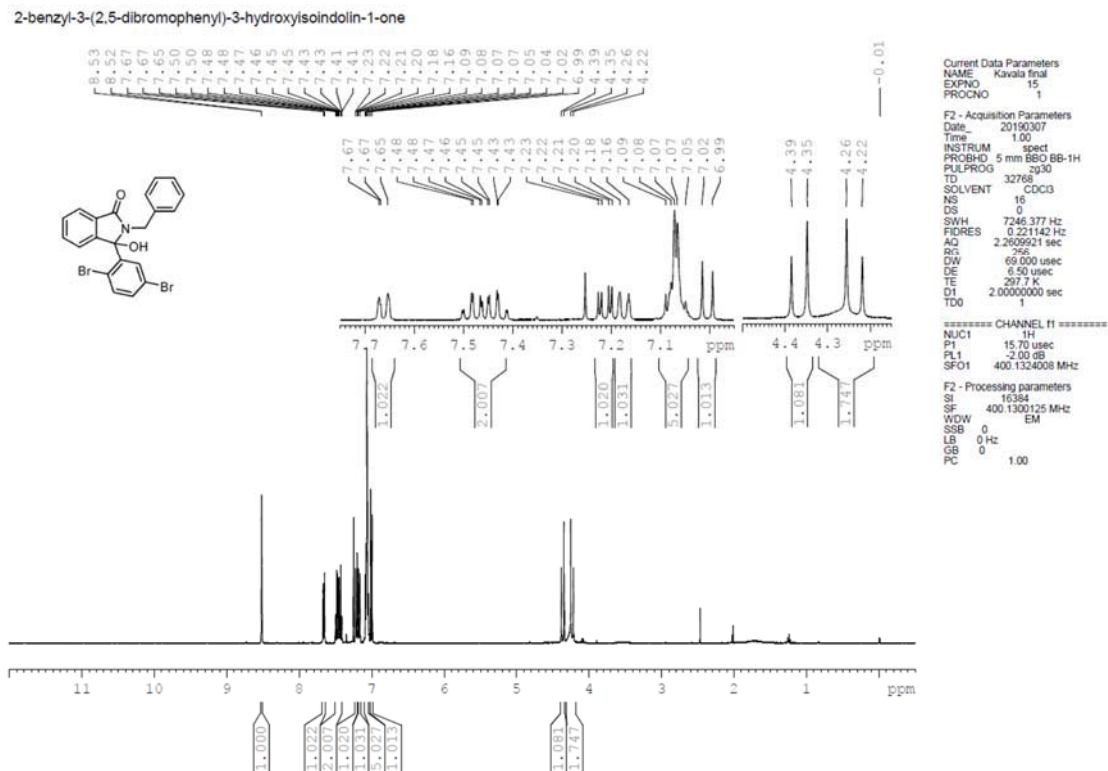

<sup>13</sup>C NMR spectra of 2-Benzyl-3-(2,5-dibromophenyl)-3-hydroxyisoindolin-1-one (**3ar**)

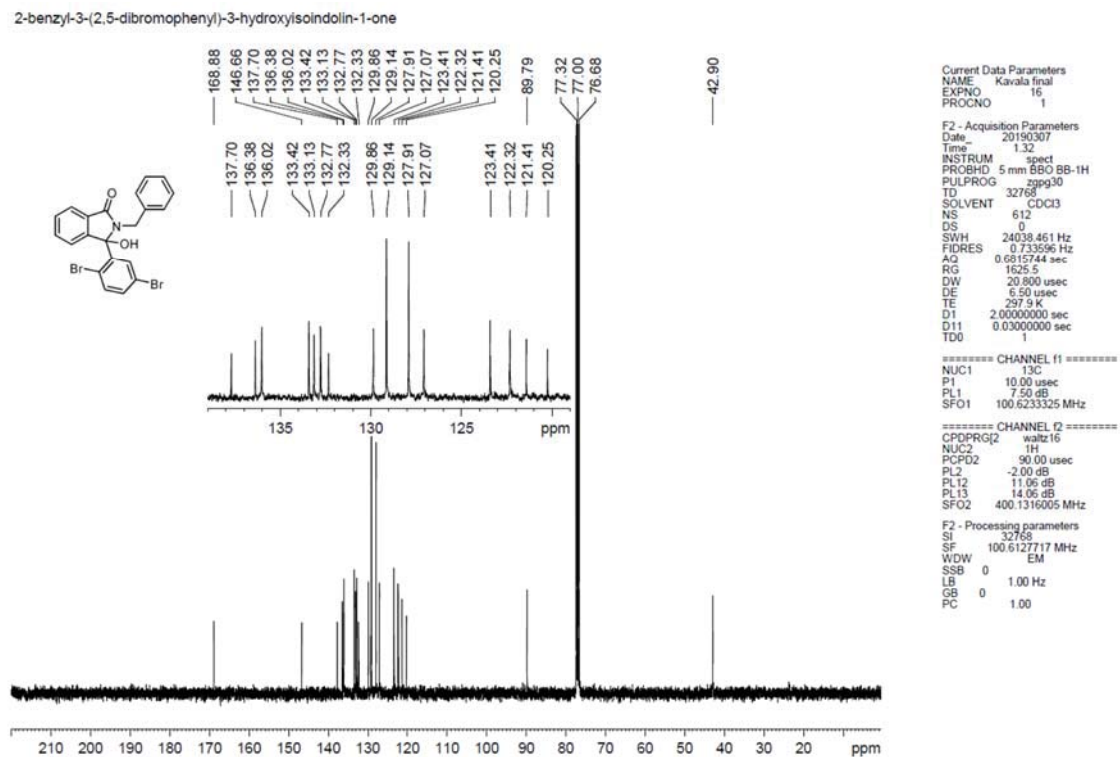

Supplement: c9ob02329a1.pdf [file c9ob02329a1.pdf]
